# Supplementary material for: Impact of white blood cell count on the development of contrast-induced acute kidney injury in patients receiving percutaneous coronary intervention
Source: PeerJ. 2024 Jun 28;12:e17493. doi: 10.7717/peerj.17493 (PMC11636986; doi:10.7717/peerj.17493)
Supplement: Data S1 [file peerj-12-17493-s001.xlsx]

## Sheet: 1013（white 11-05-19）
DN(number)	CI-AKI(1=yes 0=no)	SEX（1=M 2=F）	age(y)	BMI(body mass index,kg/m2)	ACS(1=yes 2=0)	stable angina(1=yes 0=no)	SBP(systolic blood pressure)	DBP(diastolic blood pressure)	PVD(peripheral vascular disease,1=yes 0=no)	DM(diabetes mellitus,1=yes 0=no)	heart failure(I-III)(1=yes 0=no)	hypertention(1=yes 0=no)	Previous PCI(1=yes 0=no)	Previous CABG(1=yes 0=no)	TIA/stroke(1=yes,0=no)	current smoker	previous smoke	eGFR <60mL/min (ml/min/1.73m2)	eGFR base line (ml/min/1.73m2)	eGFR after PCI (ml/min/1.73m2)	Aaspirin(1=yes 0=no)	clopidogrel(1=yes 0=no)	ticagrelor(1=yes 0=no)	angiotensin-converting enzyme inhibitor(1=yes 0=no)	angiotensin receptor blocker(1=yes 0-no)	Beta-blocker(1=yes 0=no)	Calcium antagonist(1=yes 0=no)	Statins(1=yes 0=no)	GPIIb/IIIa inhibitors(1=yes 0=no)	Nitrates(1=yes 0=no)	Proton pump inhibitor(1=yes 0=no)	contrast media dose(ml)	Iohexol(1=yes 0=no)	IABP	CAG	Multivessel PCI(1=yes 0=no)	Multivessel disease(1=yes 0=no)	left coronary artery(1=yes 0=no)	left anterior descending artery(1=yes 0=no)	white blood cell	HB	PLT	neutrophil;	lymphocytes	P/L	Triglycerides, mmol/L	Triglycerides, mmol/L	LDL cholesterol	HDL cholesterol
0001	0	2	72	23.1	1	0	114	70	0	0	0	1	0	0	0	0	0	1	41.5648	56.5281	1	1	0	0	1	1	0	1	0	1	1	75	1	0	3	1	1	0	1	13.47	123	91	10.65	2.25	40.4444	2.05	4.23	2.27	0.96
0002	0	1	54	24.2	1	0	130	80	0	1	0	0	0	0	0	1	0	0	91.3969	100.805	1	0	1	0	0	1	0	1	0	0	1	95	1	0	2	1	1	0	1	7.63	145	222	5.04	1.93	115.026	3.58	4.65	2.15	1.07
0003	0	2	67	30.8	1	0	120	80	0	1	0	1	0	0	0	0	0	1	49.0042	86.523	1	1	0	1	0	1	0	1	0	1	0	75	1	0	2	1	1	0	1	9.38	142	223	5.32	3.13	71.246	1.94	3.07	1.24	1.11
0004	0	2	62	20.5	1	0	140	90	0	0	0	1	0	0	0	0	0	0	75.0475	122.805	1	0	1	1	0	1	1	1	0	1	1	100	1	0	2	1	1	0	1	3.6	115	92	1.92	1.2	76.6667	0.86	3.94	1.93	1.5
0005	0	1	66	25.8	1	0	150	84	0	1	0	1	0	0	0	0	0	0	86.8	79.2961	1	0	1	1	0	1	0	1	1	0	1	95	1	0	3	1	1	0	1	10.68	155	169	8.34	1.78	94.9438	1.57	5.36	3.08	1.35
0006	0	1	69	24.3	1	0	158	72	0	0	0	1	0	0	0	0	0	0	61.2685	52.9609	1	0	1	0	1	1	0	1	1	1	1	85	1	0	3	1	1	0	1	6.99	142	213	5.56	0.99	215.152	1.68	4.48	2.48	1.26
0007	0	1	39	30.7	1	0	110	80	0	1	0	0	0	0	0	0	0	0	122.042	146.76	1	1	0	0	0	1	0	1	0	0	1	100	1	0	3	0	1	0	1	6.68	146	215	3.55	2.52	85.3175	2.18	6.45	4.42	1.35
0008	0	1	59	18.7	1	0	120	80	0	0	0	0	0	0	0	0	0	1	58.7224	58.0474	1	0	1	1	0	1	0	1	1	0	1	75	1	0	3	1	1	0	1	6.13	141	281	4.95	0.77	364.935	1.13	4.66	2.65	1.24
0009	0	1	45	28.7	1	0	140	100	0	1	0	1	0	0	0	0	0	0	130.654	151.483	1	0	1	1	0	1	1	1	1	1	1	100	1	0	1	0	0	0	0	11.21	160	237	4.34	6.04	39.2384	7.41	6.78	3.03	1.2
0010	1	2	67	25.6	1	0	100	62	0	1	0	0	1	0	0	0	0	0	84.9584	63.4018	1	1	0	0	0	1	0	1	0	1	1	95	1	0	3	0	1	0	1	5.94	118	139	3.51	1.94	71.6495	4.22	5.28	2.07	1.07
0011	0	1	73	24.3	1	0	120	74	0	0	0	0	0	0	0	0	0	0	64.1012	67.0149	1	1	0	0	0	0	0	1	0	0	1	90	1	0	1	0	0	0	1	4.03	136	172	2.23	1.19	144.538	1.45	4.07	1.99	1.35
0012	0	1	45	20	1	0	108	80	0	0	0	0	0	0	0	0	0	0	75.2567	86.8347	1	0	1	1	0	1	0	1	0	1	1	85	1	0	1	0	0	0	1	17.11	135	199	14.06	2.32	85.7759	1.29	3.76	1.89	0.3
0013	0	1	66	23.9	1	0	146	82	1	1	0	1	0	0	0	0	0	0	78.4026	78.4026	1	0	1	1	0	1	0	1	0	0	1	100	1	0	3	1	1	0	1	18.28	130	218	16.38	1.24	175.806	NA	NA	NA	NA
0014	0	2	43	26.7	1	0	130	60	0	1	0	1	1	0	0	0	0	0	NA	115.666	1	1	0	1	0	1	0	1	0	1	1	70	1	0	3	1	1	0	1	5.65	136	262	39.4	2.48	105.645	1.88	5.06	2.83	1.29
0017	0	2	76	19.2	1	0	106	66	0	0	0	1	0	0	0	1	0	1	53.4404	46.7604	1	0	1	1	0	1	0	1	1	0	1	75	1	0	1	0	0	0	1	6.67	127	187	2.61	3.41	54.8387	1.3	3.9	1.87	1.33
0018	0	1	48	30.4	1	0	112	80	0	1	0	1	0	0	0	0	0	0	76.6837	99.2377	1	0	1	1	0	1	1	1	1	1	1	95	1	0	3	0	1	0	1	8.4	147	196	7.64	0.5	392	3.56	4.76	2.38	0.85
0019	0	1	38	25.5	1	0	119	79	0	0	0	0	0	0	0	1	0	0	149.633	149.633	1	0	1	1	0	1	0	1	1	0	1	100	1	0	2	1	1	0	0	7.21	140	268	3.86	2.84	94.3662	1.64	8.15	NA	1.04
0020	0	2	57	30	1	0	130	73	0	0	0	1	0	0	0	1	0	0	77.934	74.3508	1	0	1	1	0	1	1	1	1	1	1	95	1	0	2	0	1	0	0	9.63	121	184	6.84	2.37	77.6371	3.37	5.45	2.82	1.09
0021	0	1	74	27.5	1	0	142	82	0	0	0	1	0	0	0	1	0	1	49.1979	46.9096	1	1	0	1	0	0	0	1	0	1	1	75	1	0	3	1	1	0	1	8	117	181	5.75	1.78	101.685	1.66	6.5	4.28	1.09
0022	1	2	63	28.9	0	1	105	70	0	0	0	0	0	0	0	0	0	0	72.7384	57.1516	1	0	1	0	0	1	0	1	0	0	0	90	1	0	1	0	0	0	1	4.94	132	216	2.77	1.79	120.67	1.13	3.13	1.37	1.25
0023	0	2	64	24.2	0	1	120	82	0	0	0	1	0	0	0	0	0	0	66.4502	77.5253	1	1	0	1	0	1	0	1	0	0	0	90	1	0	1	1	0	0	0	7.53	110	189	4.53	2.46	76.8293	1.22	4.74	2.38	1.62
0024	0	1	52	24.4	1	0	120	80	0	1	0	1	0	0	0	0	1	0	103.748	98.3584	1	1	0	1	0	1	0	1	0	0	0	95	1	0	3	1	1	0	1	5.55	141	177	3.67	1.31	135.115	2.03	4.32	2.55	0.82
0025	1	1	65	21.1	1	0	136	99	0	0	0	0	0	0	0	0	0	1	49.0208	34.6231	1	0	1	1	0	1	0	1	0	1	1	75	1	0	1	0	0	0	0	8.13	132	172	6.31	1.05	163.81	1.05	4.84	3.02	1.08
0026	0	1	63	25.3	1	0	142	82	0	1	0	1	0	0	0	1	0	1	54.7092	79.0244	1	0	1	0	0	1	1	1	0	1	1	75	1	0	3	1	1	0	1	8.41	150	225	6.12	1.76	127.841	3.16	4.95	2.67	0.94
0027	0	1	52	28.8	1	0	145	95	0	1	0	1	0	0	0	0	0	0	92.5428	86.6358	1	1	0	1	0	1	0	1	0	1	1	95	1	0	2	1	1	0	1	6.68	132	205	4.55	1.47	139.456	3.82	5.37	2.66	0.8
0028	0	1	76	20.3	1	0	145	90	1	0	0	1	0	0	0	0	0	1	58.6797	57.2485	1	1	0	1	0	1	0	1	0	1	1	75	1	0	3	1	1	0	1	8.5	146	280	5.83	2.16	129.63	1.78	7.61	4.98	1.24
0029	0	1	75	24.2	0	1	178	88	0	1	0	1	1	0	0	0	1	1	46.8623	38.3419	1	1	0	0	1	1	0	1	1	1	1	75	1	0	1	0	0	0	1	8.76	142	208	6.19	2.08	100	2.19	4.28	1.99	1.25
0030	0	1	62	25	1	0	135	90	0	0	0	1	0	0	0	1	0	0	95.3545	101.314	1	0	1	1	0	1	1	1	1	1	1	95	1	0	2	0	1	0	1	13.29	155	233	11.15	1.54	151.299	1.46	5.91	3.38	1.73
0031	1	2	44	25.3	1	0	140	85	0	0	0	1	0	0	0	0	0	0	105.741	61.3674	1	1	0	1	0	1	1	1	0	1	1	95	1	0	3	0	1	0	1	6.1	97	416	3.83	1.76	236.364	2.16	3.32	1.29	1.16
0034	0	1	61	24.6	1	0	128	72	0	0	0	1	0	0	0	1	0	0	90.7041	79.906	1	1	0	0	0	1	1	1	1	0	1	95	1	0	2	1	1	1	1	9.32	146	194	5.89	2.92	66.4384	4.97	4.5	1.98	0.91
0035	0	1	60	27.9	1	0	130	70	0	1	0	0	0	0	0	1	0	0	111.161	106.654	1	0	1	0	0	1	0	1	1	0	0	100	1	0	1	0	0	0	1	7.73	161	204	4.82	2.21	92.3077	1.26	4.49	2.61	1.37
0036	0	2	61	27.6	1	0	142	88	0	0	0	1	0	0	0	0	0	0	102.613	102.613	1	1	0	1	0	1	0	1	0	1	0	100	1	0	3	1	1	0	1	7.39	129	226	4.61	2.15	105.116	NA	NA	NA	NA
0038	0	1	45	24.8	1	0	114	82	0	1	0	1	0	0	0	0	0	0	119.553	119.553	1	1	0	1	0	1	0	1	1	1	1	100	1	0	2	1	1	0	1	14.62	156	255	12.34	1.68	151.786	3.67	7.26	4.09	1.49
0039	0	2	71	22.5	1	0	122	70	0	0	0	1	0	0	0	0	0	1	34.5693	48.397	1	1	0	0	0	1	0	1	1	0	1	75	0	0	3	1	1	0	1	8.56	110	307	5.35	2.51	122.311	2.86	4.76	2.37	1.1
0040	0	1	59	23.5	1	0	128	72	0	0	0	0	1	0	1	1	0	0	71.4223	86.073	1	1	0	0	0	1	0	1	0	0	1	90	1	0	3	0	1	0	1	8.38	151	214	5.59	1.74	122.989	1.44	3.02	1.44	0.86
0041	0	2	53	19	1	0	120	70	0	0	1	0	0	0	0	0	0	0	82.8698	80.1966	1	0	1	1	0	1	0	1	1	1	1	95	1	1	2	1	1	0	1	15.91	116	252	14.74	0.86	293.023	2.19	4.39	2	1.37
0042	0	1	48	26	1	0	117	79	0	1	0	0	0	0	0	1	0	0	112.469	105.44	1	0	1	1	0	1	0	1	1	1	1	95	1	0	3	1	1	0	1	16.07	144	251	14.28	1.04	241.346	1.63	7.8	5.27	1.47
0043	0	1	53	29.8	0	1	155	89	0	1	0	1	0	0	0	0	1	0	93.1994	102.731	1	1	0	1	0	1	1	1	1	0	1	95	1	0	2	1	1	0	1	7.61	127	255	4.85	2.2	115.909	1.79	4.07	2.15	1.07
0044	0	1	49	29.2	1	0	130	74	0	0	0	1	0	0	0	1	0	1	58.6506	68.4257	1	1	0	0	1	0	0	1	0	1	0	75	1	0	3	1	1	0	1	7.33	122	182	4.59	1.73	105.202	0.94	4.17	2.39	1.23
0045	1	2	66	22	1	0	108	56	1	1	0	1	0	0	0	0	0	0	76.8949	52.4283	1	1	0	1	0	1	0	1	0	1	1	75	1	0	3	1	1	0	1	4.3	118	191	3	0.89	214.607	0.76	2.59	1.02	1.1
0047	0	1	66	24.4	1	0	140	80	1	1	1	0	1	0	0	0	0	0	96.0316	96.0316	1	0	1	1	0	1	0	1	0	1	1	95	1	0	1	1	0	0	1	8.07	139	127	5.46	1.77	71.7514	1.66	2.89	1.22	0.8
0049	0	2	73	26.2	1	0	143	77	0	0	0	0	0	0	0	0	0	0	60.7803	70.9103	1	1	0	1	0	1	0	1	0	1	0	85	1	0	3	1	1	0	1	9.63	117	216	6.55	2.31	93.5065	NA	NA	NA	NA
0050	0	1	79	23	0	1	130	60	1	0	0	1	1	0	1	0	0	1	55.5811	63.1603	1	1	0	1	0	1	0	1	0	1	1	75	1	0	4	1	1	1	1	4.72	138	173	3.23	0.94	184.043	0.77	3.5	1.6	0.4
0051	0	1	51	24.2	1	0	106	72	0	1	0	0	0	0	0	1	0	0	88.5597	91.7607	1	1	0	0	0	1	0	1	0	1	1	95	1	0	3	1	1	0	1	7.94	156	226	6.09	1.47	153.741	1.97	5.5	3.3	1.04
0052	1	1	53	24.2	1	0	168	105	0	1	0	1	0	0	0	1	0	0	94.2019	80.4162	1	0	1	1	0	1	0	1	1	1	1	95	1	0	2	0	1	0	1	9.78	143	250	7.47	1.57	159.236	2.29	6.54	4.14	0.95
0054	0	1	51	23	1	0	135	89	0	0	0	1	1	0	0	1	0	0	65.4827	60.4455	1	0	1	1	0	1	0	1	1	1	1	90	1	0	3	1	1	0	1	8.8	143	276	6.58	1.27	217.323	2.07	6.11	3.32	1.38
0055	0	2	71	26.7	1	0	102	55	0	0	0	0	0	0	0	1	0	0	84.3521	89.6241	1	0	1	1	0	1	0	1	1	1	1	95	1	0	1	1	0	0	1	10.01	117	211	7.78	1.37	154.015	1.26	5.5	2.7	2.04
0056	1	1	68	33.1	1	0	130	83	0	1	0	1	0	0	0	0	0	0	74.0351	55.787	1	1	0	0	0	0	0	0	0	0	0	90	0	0	3	1	1	0	1	13.23	147	191	11.16	1.07	178.505	3.2	6.14	3.28	1.14
0057	0	1	31	23.1	1	0	132	88	0	1	0	0	0	0	0	0	1	0	110.459	110.459	1	1	0	0	0	1	0	1	1	1	1	100	1	0	1	0	0	0	0	10.04	157	304	8.04	1.55	196.129	2.04	3.84	1.81	1.93
0058	0	2	73	26.4	0	1	121	73	0	1	0	1	0	0	0	0	0	0	75.9094	79.7692	1	1	0	1	0	1	0	1	1	1	0	75	1	0	3	1	1	0	1	3.87	107	177	2.68	1.02	173.529	5.73	8.69	2.78	2.48
0059	1	1	71	23.8	1	0	124	62	0	1	0	1	0	0	0	0	0	0	70.486	55.3277	1	1	0	1	0	1	0	1	1	1	1	100	0	0	3	1	1	1	1	11.7	132	227	9.61	1.22	186.066	1.01	5.89	3.73	1.3
0060	0	1	79	21.5	1	0	120	70	0	1	0	0	0	0	0	1	0	0	62.1434	54.6862	1	1	0	1	0	1	0	1	0	1	1	85	1	0	3	1	1	0	1	15.88	124	169	13.06	1.64	103.049	1.07	4.26	2.21	1.17
0061	0	1	44	26.5	1	0	124	75	0	0	0	0	0	0	0	0	0	0	140.831	122.462	1	0	1	1	0	1	0	1	0	1	1	100	1	0	3	1	1	0	1	6.13	128	222	3.95	1.51	147.02	1.56	4.15	2.1	1.27
0062	0	1	42	27.5	1	0	124	79	0	1	0	1	0	0	0	0	0	0	61.7515	67.6542	1	1	0	1	0	1	0	1	1	1	1	85	1	0	1	0	0	0	1	8.68	144	190	5.26	2.84	66.9014	1.21	3.5	1.81	0.96
0063	0	2	67	22.3	1	0	160	90	1	0	0	1	0	0	1	0	0	0	75.5695	83.4413	1	1	0	0	0	1	1	1	0	0	1	95	0	0	3	1	1	0	1	5.98	134	284	3.35	2.07	137.198	1.2	5.77	3.43	1.64
0064	1	1	81	20.7	1	0	120	80	0	0	0	0	1	0	0	0	1	1	33.1395	24.8546	1	1	0	0	0	0	0	1	0	0	1	70	1	0	3	0	1	0	1	5.88	137	215	4.32	0.82	262.195	0.85	3.31	1.55	1.39
0065	0	1	81	16	0	1	120	80	0	1	0	1	0	0	0	1	0	1	46.9399	45.4956	1	0	1	1	0	1	0	1	0	1	1	75	1	0	3	1	1	0	1	4.43	107	223	3.64	0.5	446	0.61	3.87	1.41	2.12
0066	0	1	67	23.2	1	0	160	90	0	0	0	1	1	0	0	0	1	1	52.8521	47.3371	1	1	0	1	0	1	0	1	0	0	0	75	1	0	3	1	1	1	1	7.53	134	149	4.43	2.22	67.1171	0.74	3.4	1.41	1.68
0067	0	1	62	21.6	1	0	90	68	0	1	0	0	0	0	0	1	0	0	100.752	86.1267	1	1	0	0	0	1	0	1	1	1	1	90	1	0	2	1	1	0	1	8.48	158	152	5.24	2.1	72.381	2.1	5.45	3.13	1.58
0068	0	1	48	31.6	1	0	124	86	0	1	0	0	1	0	0	1	0	0	96.8796	106.357	1	1	0	1	0	1	0	1	0	0	1	95	1	0	2	0	1	0	1	8.2	145	159	5.77	1.79	88.8268	3.72	5.02	2.12	1.14
0069	0	1	54	29.4	1	0	125	76	0	1	0	0	0	0	0	0	0	0	90.4383	116.816	1	1	0	1	0	1	0	1	1	0	1	95	1	0	2	1	1	0	1	7.83	155	308	4.74	2.24	137.5	1.75	4.56	2.68	1.2
0070	0	1	62	29.1	1	0	132	78	0	0	0	1	1	0	0	0	0	0	114.425	105.392	1	1	0	0	0	1	1	1	1	1	1	100	1	0	3	0	1	0	1	5.03	143	140	2.67	1.84	76.087	1.1	3.34	1.37	1.59
0071	0	1	58	24.5	1	0	122	80	0	0	0	0	0	0	0	1	0	0	101.697	116.952	1	1	0	0	0	1	0	1	1	0	1	100	1	0	3	1	1	0	1	6.46	159	172	3.26	2.51	68.5259	2.69	3.8	2.05	0.73
0072	1	1	73	25.7	1	0	215	107	0	0	0	1	0	0	0	0	0	0	92.4757	69.9207	1	0	1	1	0	1	1	1	0	0	1	95	1	0	1	0	0	0	1	9.4	153	282	6.28	2.16	130.556	1.83	4.93	3	1.26
0073	0	1	68	22.6	1	0	150	80	0	0	0	1	0	0	0	0	0	0	91.6	81.8849	1	1	0	1	0	1	0	1	0	0	0	95	1	0	1	0	0	0	1	7.48	145	213	5.48	1.41	151.064	0.76	3.9	2.3	NA
0074	0	1	72	26.2	1	0	149	75	0	0	0	0	1	0	0	0	0	1	57.6818	57.6818	1	1	0	0	1	0	0	1	0	0	0	75	1	0	1	0	0	0	1	5.39	145	190	3.4	1.47	129.252	1.71	5.91	3.7	1.1
0075	0	2	66	23.8	1	0	125	70	1	1	0	1	0	0	0	0	0	0	61.9431	60.2689	1	1	0	1	0	1	0	1	0	0	1	85	1	0	3	1	1	0	1	9.41	117	165	5.99	2.45	67.3469	0.85	4.18	2.29	1.64
0076	0	1	68	29.8	1	0	125	78	0	0	0	0	0	0	0	1	0	0	88.0196	89.0674	1	0	1	0	0	1	0	1	0	1	1	95	1	0	3	1	1	0	1	10.19	122	184	8.06	1.26	146.032	1.15	4.08	2.53	0.9
0077	0	1	62	28.3	1	0	158	69	1	0	0	1	0	0	0	0	1	0	96.5615	107.442	1	0	1	1	0	1	1	1	0	1	1	95	1	0	3	1	1	0	1	10.73	144	278	9.18	1.15	241.739	1.66	4.71	2.59	1.36
0079	0	1	67	26	0	1	170	90	1	1	0	1	0	0	1	0	1	0	70.988	66.4568	1	1	0	1	0	1	0	1	0	1	1	90	1	0	3	1	1	0	1	5.12	128	139	3.79	0.97	143.299	1.07	2.68	1.18	1.08
0080	0	1	51	28.5	1	0	165	98	0	0	0	1	0	0	0	1	0	0	112.381	105.444	1	0	1	1	0	1	0	1	1	1	1	100	1	0	3	0	1	0	1	11.39	139	255	8.56	2.15	118.605	6.17	6.01	2.28	1
0082	0	1	75	20.3	1	0	120	60	0	1	0	1	1	0	0	0	0	1	51.1086	47.8463	1	0	1	1	0	1	0	1	0	1	0	75	1	0	1	1	0	0	1	5.14	123	138	4.46	0.29	475.862	1.16	3.46	1.64	0.98
0083	0	1	65	24.2	1	0	180	108	1	1	0	1	0	0	0	0	1	1	57.0882	50.0111	1	1	0	1	0	1	1	1	0	1	1	75	1	0	4	1	1	1	1	10.23	153	184	7.05	2.18	84.4037	1.44	4.42	2.5	1.12
0084	0	1	66	24.8	1	0	135	85	0	0	0	0	0	0	0	0	0	0	67.8484	91.8563	1	0	1	1	0	1	0	1	0	1	1	90	0	0	3	0	1	0	1	5.95	126	172	4.56	0.9	191.111	1.91	5.25	3.49	0.96
0085	0	1	70	26	1	0	97	58	0	0	0	0	0	0	0	0	0	0	82.2832	69.0118	1	1	0	0	0	1	0	1	0	0	1	95	1	0	3	1	1	0	1	8.47	102	160	7.13	0.87	183.908	1.12	4.46	2.69	1.24
0086	0	1	52	27.1	1	0	121	64	0	1	0	0	1	0	0	1	0	0	126.022	126.022	1	1	0	0	0	0	0	1	1	1	1	90	1	0	3	1	1	0	1	18.47	175	227	16.71	1.07	212.15	4.08	5.32	2.65	0.92
0087	0	1	71	21	1	0	135	72	0	0	0	0	0	0	0	0	1	1	55.6365	55.6365	1	1	0	1	0	1	0	1	1	0	1	75	0	0	2	1	1	0	1	9.57	160	210	7.08	1.76	119.318	3.39	4.57	2.24	0.83
0088	0	2	58	21.1	0	1	110	80	0	1	0	1	0	0	0	0	0	1	41.4994	48.1928	1	1	0	1	0	1	0	1	0	1	1	75	1	0	3	1	1	0	1	9.26	185	193	5.12	3.14	61.465	1.26	4.6	2.69	1.27
0089	0	2	66	22.4	0	1	120	70	0	1	0	1	1	0	0	0	0	1	42.331	104.769	1	0	1	1	0	1	0	1	0	1	1	75	0	0	2	1	1	0	1	7.54	129	219	5.2	1.79	122.346	1.63	1.95	0.76	0.62
0090	0	1	55	29.2	1	0	135	84	0	1	0	1	1	0	0	1	0	0	96.0582	104.57	1	1	0	0	0	1	1	1	0	0	1	95	1	0	3	0	1	0	1	7.85	139	259	5.57	1.2	215.833	1.81	3.35	1.6	0.73
0091	0	2	66	29.6	1	0	145	83	1	1	0	1	0	0	0	0	0	1	58.0635	49.0536	1	1	0	1	0	1	0	1	1	1	1	75	1	0	2	0	1	0	1	7.6	95	245	5.74	1.22	200.82	1.75	5.29	3.31	1.03
0093	0	1	59	21.8	1	0	127	81	0	0	0	0	0	0	0	1	0	0	102.437	90.02	1	0	1	1	0	1	0	1	1	1	1	90	1	1	2	1	1	0	1	13.08	125	283	12.15	0.5	566	1.1	4.55	2.4	1.77
0094	0	1	75	28.3	1	0	130	70	0	0	0	1	0	0	0	0	0	1	50.7044	59.8198	1	1	0	1	0	1	0	1	1	1	0	75	1	0	2	1	1	0	1	8.52	146	145	6.06	1.53	94.7712	2.61	5.46	2.6	1.13
0095	1	2	74	22.2	1	0	150	110	0	0	0	1	0	0	0	0	0	1	51.1805	42.8637	1	0	1	1	0	1	0	1	1	1	1	75	1	0	4	0	1	1	1	11.12	109	246	9.19	1.56	157.692	1.67	5.75	3.59	1.36
0096	0	2	71	19.5	1	0	110	70	1	0	0	1	0	0	0	0	0	1	38.1379	59.7494	1	1	0	0	1	1	1	1	0	0	1	75	1	0	2	1	1	0	1	5.72	113	128	3.88	1.33	96.2406	0.94	3.47	1.45	1.16
0097	0	1	75	21.5	1	0	164	90	1	0	0	1	0	0	0	1	0	1	56.0909	72.2383	1	1	0	0	0	1	1	1	0	1	1	75	1	0	1	0	0	0	1	7.09	123	220	4.14	2.34	94.0171	NA	NA	NA	NA
0098	0	2	66	24	1	0	115	66	0	0	0	0	0	0	0	0	0	0	73.2332	65.9099	1	0	1	0	0	1	0	1	0	1	1	90	0	0	2	0	1	0	1	8.45	134	246	6.37	1.46	168.493	2.09	7.22	4.53	1.42
0099	0	2	59	26.3	1	0	140	80	1	1	0	0	0	0	1	0	0	0	66.5037	96.1928	1	1	0	0	0	0	0	1	0	1	1	90	1	0	2	1	1	0	1	8.96	123	202	5.28	3.15	64.127	2.53	6.02	3.15	1.44
0100	0	1	50	26.1	1	0	160	98	0	0	0	1	0	0	0	1	0	0	116.513	128	1	1	0	1	0	1	1	1	0	1	0	100	1	0	3	1	1	0	1	6.81	163	207	4.57	1.78	116.292	1.52	5.29	3.16	0.82
0101	0	2	58	23	1	0	140	86	0	1	0	1	0	0	0	0	0	0	89.4682	151.825	1	1	0	0	0	1	0	1	0	0	1	95	1	0	1	0	0	0	1	5.24	144	129	2.43	2.38	54.2017	1.35	4.39	2.2	1.39
0102	0	2	70	23.5	1	0	129	65	0	1	0	1	0	0	0	0	0	0	69.9408	108.242	1	1	0	1	0	1	1	1	1	1	1	90	1	0	1	0	0	0	1	6.32	133	211	3.84	1.9	111.053	1.49	5.31	3.01	1.54
0103	0	2	62	25.1	1	0	86	60	0	0	0	1	0	0	0	0	0	0	123.603	176.576	1	0	1	1	0	1	0	1	0	1	1	90	1	0	3	1	1	0	1	9.32	139	231	8.28	0.83	278.313	1.5	6.53	4.08	1.73
0104	0	1	79	23.2	1	0	120	80	0	0	0	1	1	0	0	1	0	1	49.0651	52.0208	1	1	0	1	0	1	1	1	1	0	0	75	1	0	3	1	1	0	1	6.76	109	160	5.11	1.02	156.863	1.08	3.75	1.81	1.29
0105	0	1	77	25.2	1	0	164	84	1	0	0	1	0	0	0	1	0	0	66.7482	74.1646	1	1	0	1	0	1	0	1	0	1	1	90	1	0	3	1	1	0	1	5.86	150	228	2.9	2.3	99.1304	1.52	4.38	2.66	0.92
0106	0	2	68	22.5	1	0	160	90	0	0	0	0	0	0	0	0	0	0	64.4388	67.7154	1	1	0	1	0	1	0	1	0	1	1	90	1	0	3	1	1	0	1	4.42	129	208	2.97	1.02	203.922	2.73	5.34	2.94	1.28
0107	0	1	64	19.8	1	0	97	61	1	0	0	0	0	0	0	1	0	0	66.0147	73.7811	1	1	0	1	0	0	0	1	0	0	1	90	1	0	3	1	1	0	1	11.02	129	226	9.39	0.95	237.895	0.89	3.8	2.4	1.1
0108	0	1	52	22.4	0	1	140	90	1	0	0	0	0	0	1	0	0	0	137.621	162.086	1	1	0	1	0	1	0	1	0	0	0	100	1	0	1	1	0	0	1	3.86	145	163	2.62	0.77	211.688	0.65	3.32	1.46	1.6
0109	0	1	52	29.8	1	0	124	80	0	1	0	0	1	0	0	1	0	0	101.536	114.388	1	1	0	0	0	1	0	1	1	1	1	100	1	0	3	1	1	0	1	9.92	153	288	6.49	2.77	103.971	4.03	5.49	2.45	0.6
0110	0	1	56	16.9	1	0	109	48	0	0	0	1	0	0	0	1	0	0	84.3521	72.6726	1	0	1	0	0	0	0	1	1	0	1	95	1	0	3	1	1	0	1	7.58	107	241	5.41	1.29	186.822	1.04	3.37	1.52	1.34
0111	0	1	38	26.1	1	0	140	92	1	0	0	0	0	0	0	1	0	0	151.088	127.68	1	1	0	1	0	1	0	1	1	0	1	100	1	0	1	0	0	0	0	7.33	169	237	5.72	1.32	179.545	1.89	5.46	2.85	1.01
0112	0	2	59	20.4	1	0	130	80	0	1	0	0	0	0	0	0	0	0	67.7489	79.4747	1	1	0	0	0	0	0	1	0	0	1	90	1	0	1	0	0	0	1	7.25	122	269	5.33	1.53	175.817	0.86	3.82	1.92	1.44
0114	1	2	77	25.5	1	0	110	56	0	0	0	1	1	0	0	0	0	0	69.9793	51.3772	1	1	0	0	1	0	0	1	1	0	1	90	1	0	3	1	1	0	1	12.81	98	198	9.4	2.19	90.411	3.02	3.89	1.67	1.17
0115	0	1	48	26.8	1	0	136	96	0	1	0	1	0	0	0	1	0	0	83.4825	74.9796	1	1	0	1	0	0	1	1	1	0	1	95	1	0	3	1	1	0	1	6.86	158	188	3.82	2.36	79.661	1.48	3.62	2.1	1.03
0116	0	1	71	27.3	1	0	167	77	0	0	0	1	1	0	1	1	0	1	56.1057	62.4033	1	1	0	1	0	1	0	1	1	1	1	75	1	0	3	1	1	0	1	7.41	138	174	6.81	0.39	446.154	1.03	3.14	1.57	1.19
0117	0	1	59	23.9	1	0	158	92	0	1	0	1	0	0	0	1	0	0	68.2272	80.6322	1	0	1	1	0	1	0	1	0	0	1	90	1	0	2	0	1	0	1	6.27	146	224	4.71	1.11	201.802	2.09	5.5	2.82	1.69
0120	0	2	75	25.4	1	0	129	66	1	0	0	1	0	0	1	1	0	0	60.1408	69.687	1	1	0	1	0	1	0	1	0	1	1	85	1	0	1	1	0	0	1	7.37	100	287	4.82	1.94	147.938	1.44	4.12	2.22	1.41
0121	0	1	63	27.5	0	1	146	86	1	1	0	1	1	0	0	0	0	0	61.3905	77.5813	1	1	0	0	1	1	0	1	1	0	1	85	1	0	3	1	1	0	1	7	147	238	4.48	1.89	125.926	1.11	4.08	2.26	1.07
0122	0	1	80	24.7	0	1	148	80	1	1	0	1	1	0	1	1	0	1	43.4664	56.4228	1	1	0	0	1	1	1	1	1	0	1	75	1	0	3	1	1	0	1	6.51	149	136	4.33	1.4	97.1429	1.68	3.95	2.09	0.94
0123	0	1	63	28.3	1	0	111	57	1	0	0	1	0	0	1	0	0	0	77.4628	94.132	1	1	0	1	0	1	1	1	1	1	1	95	1	0	3	0	1	0	1	12.03	128	158	9.2	1.49	106.04	0.76	3	1.52	1.05
0124	0	1	58	21.5	1	0	150	98	0	0	0	1	0	0	0	1	0	0	61.207	71.5228	1	0	1	0	0	0	1	1	0	0	1	85	1	0	1	0	0	0	1	6.55	135	220	4.38	1.57	140.127	0.67	4.64	2.89	1.33
0125	0	2	59	23.1	1	0	130	80	1	0	0	1	0	0	0	0	0	0	79.9603	102.077	1	1	0	0	0	1	1	1	0	0	1	95	1	0	2	1	1	0	1	6.15	136	138	3.11	2.5	55.2	2	0.05	2.45	1.21
0126	0	2	67	27.7	1	0	126	78	0	0	0	1	0	0	0	0	0	0	67.4273	97.0954	1	1	0	0	0	1	1	1	0	0	1	90	1	0	2	0	1	0	1	7.45	134	231	5.23	1.6	144.375	1.63	4.68	2.78	1.05
0127	0	2	69	30	0	1	170	90	1	1	0	1	1	0	1	0	0	1	56.9952	55.1762	1	1	0	0	1	1	1	1	0	1	1	75	1	0	3	0	1	0	1	6.04	101	205	1.3	4.26	48.1221	2.92	3.49	1.37	1.13
0128	0	1	66	25.4	1	0	140	90	0	1	0	0	0	0	0	1	0	0	107.696	114.997	1	1	0	0	0	1	0	1	0	0	1	100	1	0	3	1	1	0	1	9.74	161	238	5.63	3.05	78.0328	3.01	3.32	1.54	0.79
0129	0	2	66	20.3	1	0	110	75	0	1	0	1	0	0	0	0	0	1	37.722	39.9853	1	1	0	1	0	1	0	1	1	0	1	75	1	0	3	1	1	0	1	13.35	97	323	12.44	0.72	448.611	1.06	5.35	3.1	1.54
0130	0	1	60	29	1	0	153	102	0	1	0	1	0	0	0	0	0	0	124.19	144.888	1	0	1	1	0	1	1	1	1	1	1	100	1	0	1	0	0	0	1	14.39	155	189	11.87	1.83	103.279	1.89	8.11	5.62	1.87
0131	0	2	58	24.9	1	0	120	70	0	1	0	0	0	0	0	0	0	0	86.7571	86.7571	1	1	0	1	0	1	0	1	0	1	1	95	1	0	3	0	1	0	1	5.88	118	191	3.76	1.83	104.372	9.65	5.29	0.87	0.64
0132	0	2	77	25.2	1	0	158	90	1	0	0	1	0	0	1	0	0	1	41.2115	60.1001	1	1	0	1	0	1	0	1	0	0	1	75	1	0	1	1	0	0	1	4.17	113	188	2.43	1.28	146.875	0.87	3.96	2.22	1.13
0133	0	2	73	21.6	1	0	148	88	0	1	0	0	0	0	0	0	0	1	45.8033	58.0175	1	1	0	1	0	1	0	1	0	1	0	75	1	0	1	0	0	0	1	5.13	110	188	3.25	1.23	152.846	1.71	3.27	1.23	1.21
0134	0	1	48	25.8	1	0	110	78	0	0	0	1	0	0	0	0	0	0	93.5272	100.967	1	1	0	0	1	1	1	1	0	0	1	95	1	0	3	1	1	0	1	6.92	130	132	5.1	1.27	103.937	1.55	5	2.93	1.01
0135	0	2	56	25.2	1	0	153	88	0	1	0	1	0	0	0	0	0	0	99.204	92.118	1	1	0	1	0	1	1	1	0	1	0	95	1	0	3	1	1	0	1	8.22	135	272	4.48	3.08	88.3117	2.12	5.88	3.53	1.19
0136	0	2	72	18.7	1	0	160	90	0	0	0	1	0	0	0	0	0	1	41.2949	50.4715	1	1	0	1	0	1	1	1	0	1	1	75	1	0	3	1	1	0	1	4.06	116	194	2.47	1.22	159.016	0.85	5.27	2.82	2.06
0137	0	2	59	18.7	1	0	140	54	0	1	0	0	0	0	0	0	1	0	77.2978	70.1406	1	1	0	1	0	0	0	1	1	0	1	95	1	0	2	1	1	0	1	9.9	123	265	8.84	0.83	319.277	0.79	2.95	1.33	1.34
0138	0	1	76	21.4	1	0	122	76	0	0	0	1	1	1	1	0	1	1	57.5556	75.8687	1	1	0	0	1	1	0	1	0	1	1	75	1	0	3	1	1	0	1	5.31	131	172	4.01	0.89	193.258	1.18	4.37	2.67	1.09
0139	0	1	65	27.5	1	0	106	70	0	1	0	1	0	0	0	1	0	0	69.8689	88.7746	1	1	0	0	0	1	0	1	0	1	0	90	1	0	3	1	1	0	1	7.07	130	201	5.21	1.28	157.031	0.75	2.73	1.35	0.85
0140	0	1	66	28.1	1	0	160	110	0	1	0	1	0	0	0	0	0	0	97.2156	144.743	1	0	1	1	0	1	1	1	1	1	0	95	1	0	3	1	1	0	1	8.46	144	295	7.67	0.7	421.429	1	6.25	3.94	1.67
0141	0	1	65	22.9	1	0	125	70	1	0	0	1	0	0	0	1	0	1	50.2286	57.1909	1	0	1	0	0	1	0	1	1	0	1	75	1	0	3	1	1	0	1	10.84	126	256	7.81	1.79	143.017	1.69	6.23	4.05	0.8
0143	0	1	62	22.4	1	0	121	71	0	1	0	1	0	0	1	0	1	0	93.6627	84.1607	1	1	0	1	0	1	0	1	0	0	1	95	1	0	3	1	1	0	1	6.49	123	315	3.83	2.04	154.412	0.8	3.11	1.62	0.92
0144	0	1	64	25.6	0	1	140	70	1	1	0	1	0	1	0	0	1	1	50.3039	61.2395	1	1	0	0	1	1	0	1	1	1	1	100	1	0	4	1	1	1	1	7.79	129	189	4.67	2.67	70.7865	1.04	2.74	1.21	0.88
0145	0	2	80	28.7	1	0	150	90	0	1	0	1	0	0	0	0	0	0	75.8754	134.046	1	1	0	1	0	1	1	1	0	0	1	95	1	0	3	1	1	0	1	7.03	155	198	4.95	1.53	129.412	1.32	3.52	1.68	1.09
0146	1	1	50	35.1	1	0	146	110	0	1	0	1	0	0	0	0	1	0	97.355	76.4932	1	1	0	0	1	1	1	1	0	1	1	95	1	0	2	0	1	0	1	5.34	140	212	3.33	1.56	135.897	0.7	3.43	1.95	1.18
0147	0	2	68	25.4	1	0	120	70	0	1	0	1	0	0	0	0	0	1	50.1349	58.5913	1	1	0	1	0	1	0	1	0	1	1	75	0	0	1	0	0	0	1	8.96	115	297	5.38	2.77	107.22	2.47	4.84	2.54	1.06
0148	0	1	66	25.4	1	0	140	90	0	1	0	0	0	0	0	1	0	0	107.696	114.997	1	1	0	0	0	1	0	1	0	0	1	100	1	0	3	1	1	0	1	9.74	161	238	5.93	3.05	78.0328	3.01	3.32	1.54	0.97
0149	0	1	59	20.5	0	1	124	80	1	1	0	0	0	0	0	0	1	0	74.588	72.6997	1	1	0	1	0	1	0	1	1	0	1	90	1	0	2	1	1	0	1	6.04	133	101	4.38	1.15	87.8261	1.31	5.08	2.42	2.1
0150	0	2	57	22.2	1	0	129	79	0	0	0	0	0	0	0	0	0	0	81.7076	84.6788	1	0	1	0	0	1	0	1	1	0	1	95	1	0	1	0	0	0	1	8.05	129	201	6.09	1.26	159.524	NA	NA	NA	NA
0152	0	2	73	25	1	0	135	80	1	1	0	1	1	0	1	0	0	0	75.9502	78.8163	1	0	1	1	0	1	0	1	0	0	1	100	1	0	3	0	1	0	1	8.39	116	164	5.87	1.81	90.6077	2.02	5.86	3.05	1.32
0153	0	2	46	21.2	1	0	158	86	1	0	0	1	0	0	0	0	0	0	69.958	129.422	1	1	0	1	0	1	1	1	0	1	1	90	1	0	1	1	0	0	1	4.98	138	179	3.59	1.07	167.29	1.43	5.9	3.71	1.12
0154	0	2	75	24.2	1	0	186	80	1	1	0	1	0	0	0	0	0	0	67.5428	77.0225	1	0	1	0	1	1	1	1	0	0	1	100	1	0	3	1	1	0	1	7.44	145	223	5.18	1.66	134.337	2.85	5.29	2.73	1.21
0155	0	1	50	20.5	1	0	102	78	1	1	0	0	0	0	0	0	0	0	126.004	220.507	1	1	0	1	0	1	0	1	0	0	1	100	1	0	2	0	1	0	1	8.41	125	317	5.21	2.57	123.346	0.71	3.45	1.86	1.28
0156	1	1	66	27.4	1	0	178	82	0	1	0	1	0	0	0	0	0	0	108.703	85.3115	1	1	0	0	1	1	1	1	1	0	1	100	1	0	4	1	1	0	0	7.11	135	196	4.98	1.43	137.063	5.36	5.62	1.47	1.13
0158	0	1	65	26	1	0	146	82	0	1	0	1	0	0	0	1	0	0	85.9566	96.8525	1	1	0	1	0	1	1	1	0	0	1	95	1	0	2	1	1	0	1	6.64	147	233	44.9	1.61	144.72	1.05	3.51	1.8	1.18
0159	0	1	42	22.6	0	1	120	70	0	1	0	0	0	0	0	1	0	0	121.835	114.099	1	1	0	1	0	1	0	1	0	0	0	100	1	0	1	0	0	0	1	8.29	150	232	4.31	3.12	74.359	0.72	3.08	1.26	1.49
0160	0	1	66	24.4	1	0	143	85	1	1	0	0	1	0	0	1	0	0	82.4095	87.1868	1	1	0	1	0	1	0	1	0	1	1	95	0	0	3	0	1	0	1	6.66	133	221	4.76	1	221	6.57	4.76	1.2	0.91
0161	0	1	76	22.2	0	1	140	80	1	1	0	0	0	0	0	0	0	0	73.062	90.3312	1	1	0	1	0	1	0	1	0	0	0	90	1	0	1	0	0	0	1	9.45	161	238	6.98	1.92	123.958	3.3	4.88	1.72	0.83
0162	0	1	57	26.7	0	1	120	80	0	1	0	0	0	0	0	0	0	0	112.741	109.272	1	1	0	1	0	1	0	1	1	1	1	100	1	0	2	1	1	0	1	6.47	127	147	3.72	2.17	67.7419	5.64	5.13	2.18	0.93
0163	0	1	72	24.2	1	0	120	80	1	0	0	1	0	0	1	1	0	0	74.9275	122.164	1	1	0	1	0	1	1	1	0	1	1	90	0	0	3	1	1	0	1	6.63	125	108	5.07	0.95	113.684	0.83	3.19	1.7	1.01
0164	1	2	70	26.7	1	0	150	90	1	0	0	1	0	0	0	0	0	0	63.2508	50.1644	1	1	0	1	0	1	0	1	0	1	1	85	1	0	2	1	1	0	1	7.58	131	192	5.83	1.01	190.099	1.51	7.14	4.47	1.7
0165	0	1	67	25.2	0	1	160	98	1	1	0	1	0	0	1	0	1	0	69.5682	109.322	1	1	0	1	0	1	1	1	1	0	1	100	1	0	3	1	1	1	1	5.48	109	151	3.43	1.57	96.1783	2.14	3.24	1.24	0.86
0166	0	1	51	30.1	1	0	134	83	0	1	0	1	0	0	0	1	0	0	150.649	137.918	1	0	1	1	0	1	0	1	1	0	1	100	1	0	3	1	1	0	1	12.86	144	237	9.58	2.09	113.397	1.6	5.08	3.08	0.87
0167	1	1	42	22.5	1	0	142	90	0	0	0	0	0	0	0	1	0	0	185.412	102.464	1	0	1	0	0	1	0	1	1	0	1	100	1	0	2	0	1	0	1	16.08	148	306	13.46	1.31	233.588	1.06	9.02	6.26	1.23
0168	0	1	55	20.6	1	0	140	68	0	0	0	1	0	0	0	0	1	0	88.3252	77.2845	1	1	0	1	0	1	0	1	0	1	1	95	1	0	2	1	1	0	1	7.03	128	188	4.84	1.55	121.29	1.11	2.67	0.88	1.03
0170	0	2	72	23.8	1	0	178	100	0	1	0	1	0	0	0	0	0	1	49.8245	74.7367	1	1	0	1	0	0	1	1	0	0	1	75	1	0	1	0	0	0	1	7.1	144	186	4.72	1.56	119.231	1.25	5.31	2.58	1.67
0171	0	1	72	25.4	1	0	180	80	0	1	0	1	1	0	0	1	0	0	74.7072	77.7774	1	1	0	1	0	1	0	1	1	1	1	90	1	0	2	1	1	0	1	5.82	130	219	2.94	2.23	98.2063	1.08	4.17	2.62	0.79
0172	0	1	68	26.6	1	0	154	94	0	1	0	1	1	1	0	1	0	0	104.325	124.781	1	1	0	1	0	1	0	1	0	0	1	95	1	0	2	1	1	0	1	10.08	146	237	7.34	2.01	117.91	NA	NA	NA	NA
0173	0	1	74	23.7	1	0	104	69	0	0	0	0	0	0	0	0	1	1	55.92	79.5482	1	1	0	1	0	1	0	1	0	1	1	75	1	0	3	1	1	0	1	12.88	141	197	11.98	0.54	364.815	1.1	4.81	2.81	1.31
0174	0	1	56	31.2	1	0	135	76	0	0	0	0	0	0	0	0	0	0	124.548	130.124	1	1	0	1	0	1	0	1	0	0	1	100	1	0	3	1	1	0	1	6.32	151	198	3.32	2.2	90	4.82	1.01	3.07	1.01
0175	0	2	71	20	1	0	158	80	1	0	0	0	1	0	0	0	0	0	98.3304	88.2453	1	0	1	1	0	1	0	1	0	0	1	95	1	0	2	1	1	0	1	2.91	116	148	1.81	0.7	211.429	0.67	4.04	2.06	1.23
0176	0	1	32	26.8	1	0	130	90	0	1	0	0	0	0	0	1	0	0	107.09	107.09	1	1	0	0	0	1	0	1	1	0	1	100	0	0	3	0	1	0	1	12.47	164	286	8.72	2.82	101.418	2.95	7.19	4.43	1.03
0177	0	2	55	30.8	1	0	130	80	1	1	0	1	0	0	0	0	0	0	80.6921	105.42	1	1	0	0	1	1	0	1	0	1	0	95	1	1	3	1	1	0	1	10.77	123	285	8.12	2.14	133.178	1.04	5.4	2.99	1.12
0178	0	2	66	21.2	1	0	148	90	0	0	0	1	0	0	0	0	0	0	80.0334	75.4161	1	0	1	0	1	1	1	1	0	1	1	95	1	0	3	1	1	0	1	8.54	105	265	6.55	1.31	202.29	0.7	5.51	3.04	1.57
0179	0	2	52	26.7	1	0	105	78	0	0	0	1	0	0	0	1	0	0	104.934	92.7678	1	0	1	0	0	0	0	1	1	0	1	95	1	0	2	0	1	0	1	7.28	137	193	5.17	1.55	124.516	2.15	4.48	1.87	1.04
0180	1	2	79	21.1	1	0	127	78	0	0	0	1	0	0	0	1	0	0	69.8543	51.8615	1	1	0	0	1	1	0	1	1	1	1	90	1	1	2	0	1	0	1	11.08	107	222	8.26	1.87	118.717	1.33	5.21	2.82	1.31
0181	0	2	70	NA	1	0	105	62	1	1	0	1	0	0	0	0	0	0	NA	NA	1	1	0	1	0	1	0	1	1	0	1	95	1	0	2	0	1	0	1	8.3	92	398	6	1.34	297.015	1.21	4.98	2.82	0.98
0182	0	1	69	26.7	1	0	124	82	0	0	0	1	0	0	0	1	0	0	79.8134	85.7255	1	1	0	1	0	1	1	1	0	0	1	95	0	0	3	1	1	0	1	10.47	129	179	7.13	1.79	100	1.46	6.09	3.4	1.16
0183	0	1	66	25.6	1	0	122	86	1	0	0	1	0	0	0	0	1	0	93.0128	83.5938	1	1	0	1	0	1	0	0	0	0	1	75	1	0	3	1	1	0	1	5.57	135	194	4.26	0.98	197.959	5.34	5.32	1.56	0.87
0184	0	1	67	20.1	1	0	116	62	0	0	0	0	0	0	0	1	0	1	39.9649	43.3582	1	1	0	0	0	0	0	1	0	0	0	90	1	0	3	1	1	0	1	6.39	133	203	1.85	16	12.6875	0.78	4.29	2.6	0.82
0185	0	1	74	25.9	1	0	144	76	0	1	0	1	0	0	0	0	0	0	71.0793	76.5469	1	0	1	0	0	1	1	1	0	0	0	75	1	0	3	1	1	0	1	4.94	142	185	3.31	1.24	149.194	0.73	4.07	2.14	1.21
0186	0	1	71	23.1	1	0	131	62	1	0	0	0	0	0	0	1	0	1	49.1513	54.3802	1	1	0	1	0	1	0	1	0	0	1	75	1	0	3	1	1	0	1	6.48	95	463	4.82	1.04	445.192	1.33	3.48	1.68	0.69
0187	0	1	66	20.3	1	0	90	64	0	0	1	1	0	0	1	1	0	1	41.0511	67.8484	1	1	0	1	0	0	0	1	0	0	1	100	1	0	3	1	1	0	1	7.82	135	180	5.55	1.69	106.509	3.4	4.55	1.38	1.01
0188	0	1	55	21.1	1	0	116	74	0	1	0	0	0	0	0	1	0	0	127.892	125.479	1	0	1	1	0	1	0	1	1	0	1	100	1	0	1	1	0	0	1	7.83	166	125	6.48	0.87	143.678	0.43	2.8	0.97	1.17
0189	0	2	55	24.4	1	0	198	113	0	0	0	1	0	0	0	1	0	0	112.974	107.953	1	1	0	1	0	1	0	1	1	1	1	95	1	0	3	1	1	0	1	12.54	125	231	10.89	1.25	184.8	0.67	6.77	4.32	1.44
0190	0	1	58	33.1	1	0	140	90	0	1	0	1	0	0	0	1	0	0	106.141	136.697	1	1	0	0	1	1	1	1	1	1	1	100	0	0	3	1	1	0	1	10.11	145	357	6.29	3.18	112.264	2.73	6.48	3.55	0.13
0191	0	2	58	37.5	1	0	112	80	1	0	0	1	1	0	0	0	0	0	114.458	103.631	1	1	0	1	0	1	0	1	0	1	1	100	1	0	2	0	1	0	1	8.42	126	389	5.58	2.15	180.93	1.41	3.44	1.29	1.14
0192	0	1	47	26.7	1	0	127	71	0	0	0	0	0	0	0	0	0	0	115.131	159.568	1	1	0	0	0	1	0	1	1	0	1	95	1	0	1	0	0	0	1	14.64	155	530	10.27	3.11	170.418	2.39	5.28	2.74	0.9
0193	0	1	68	21.6	1	0	169	85	1	0	0	1	0	0	0	0	0	0	82.1078	66.2798	1	1	0	1	0	1	1	1	0	0	1	95	1	0	1	1	0	0	1	5.47	144	208	2.96	1.89	110.053	1.46	3.89	1.98	0.71
0194	0	1	65	24.6	1	0	132	60	1	1	0	1	0	0	0	1	0	0	103.33	90.4136	1	0	1	1	0	1	0	1	1	0	1	90	1	0	3	1	1	0	1	13.71	154	174	12.08	0.94	185.106	1.46	5.44	3.49	1.02
0195	1	2	61	25.8	1	0	150	100	1	1	0	1	0	0	0	0	0	0	70.0183	54.727	1	1	0	1	0	1	0	1	1	1	1	100	1	0	4	0	1	1	1	10.03	101	297	6.83	2.59	114.672	2.15	4.96	2.49	1.01
0196	1	1	46	26.8	1	0	150	102	0	1	0	1	0	0	0	1	0	0	375.682	131.996	1	1	0	1	0	1	1	0	1	0	1	75	1	0	3	1	1	0	1	13.67	141	281	9	3.23	86.9969	2.52	5.33	2.47	1.02
0197	0	1	68	18.1	1	0	145	75	0	0	0	1	0	0	0	0	1	1	46.8778	66.2242	1	1	0	1	0	0	1	1	1	1	1	90	1	0	3	0	1	0	1	5.21	132	142	3.59	1.09	130.275	1.07	4.93	2.26	1.6
0198	0	1	81	25.7	1	0	140	80	1	1	0	1	0	0	0	0	0	0	71.1113	74.2485	1	0	1	1	0	0	0	1	1	0	1	95	1	1	4	1	1	1	1	11.28	129	172	9.77	1.06	162.264	0.6	3.3	1.4	1.16
0199	0	1	54	25.6	1	0	160	84	1	0	0	1	0	0	0	1	0	0	79.4817	93.5078	1	1	0	1	0	1	1	1	0	0	1	95	1	0	3	1	1	0	1	8.37	142	203	6.12	1.47	138.095	1.67	4.76	2.39	1.19
0200	0	2	46	23.9	0	1	140	85	0	0	0	0	0	0	0	0	0	0	75.2689	96.5715	1	1	0	1	0	1	0	1	0	1	1	95	1	0	1	1	0	0	1	6.2	105	262	4.37	1.48	177.027	0.62	4.03	2.13	1.26
0201	0	1	65	24.6	0	1	136	70	0	0	0	1	1	0	0	0	1	0	104.119	99.0812	1	1	0	0	1	0	1	1	0	0	1	75	1	0	3	1	1	0	1	5.44	129	191	4.13	0.96	198.958	1.06	3.8	1.39	1.35
0202	0	1	66	23.7	1	0	100	80	0	1	0	0	0	0	0	1	0	1	54.1241	67.3672	1	0	1	0	0	0	0	1	1	0	1	95	0	0	3	1	1	0	1	11.39	150	179	8.77	1.88	95.2128	1.22	5.3	3.11	1.03
0203	0	1	45	22.8	1	0	140	90	1	0	0	0	0	0	0	1	0	0	88.8949	98.6368	1	1	0	1	0	1	0	1	1	1	1	100	1	0	2	1	1	0	1	8.49	162	252	5.98	2.06	122.33	1.48	5.4	3.01	1.35
0204	0	1	55	26.6	1	0	170	110	1	1	0	0	0	0	0	1	0	0	117.665	135.614	1	1	0	1	0	1	0	1	1	1	1	70	1	0	3	1	1	0	1	12.25	164	229	10.83	0.87	263.218	1.9	5.78	3.4	1.24
0205	0	1	87	19.5	1	0	120	80	1	0	0	1	0	0	1	1	0	1	31.7609	36.4001	1	0	1	1	0	1	1	1	0	1	1	95	1	0	2	1	1	0	1	10.08	121	331	7.25	1.59	208.176	0.99	3.98	2.01	1.16
0206	0	2	60	23.1	1	0	125	62	1	0	0	0	0	0	0	1	0	0	78.5952	81.5611	1	1	0	0	0	1	0	1	0	1	0	85	0	0	2	1	1	0	1	9.59	116	301	6.12	2.62	114.885	2.29	6.51	3.72	1.23
0207	0	2	68	23.1	1	0	140	70	1	1	0	1	0	0	1	0	0	0	63.0273	67.0936	1	1	0	0	1	1	0	1	0	0	0	75	1	0	3	1	1	0	1	7.51	131	169	5.31	1.82	92.8571	1.75	3.86	1.42	1.05
0208	0	1	69	25.8	1	0	123	68	1	0	0	0	0	0	0	1	0	1	57.8647	71.7522	1	1	0	1	0	1	0	1	0	1	1	85	1	0	2	0	1	0	0	13.17	127	206	10.51	1.6	128.75	NA	NA	NA	NA
0209	0	1	64	24.6	1	0	140	84	0	0	0	1	0	0	0	0	1	0	62.2319	64.6723	1	1	0	1	0	1	0	1	0	1	1	95	1	0	3	1	1	0	1	7.5	136	334	4.81	1.71	195.322	1.37	4.56	2.37	1.11
0210	0	1	61	23.7	1	0	144	82	1	1	0	1	0	0	0	1	0	0	96.577	139.294	1	1	0	1	0	1	1	1	0	1	0	75	1	0	3	1	1	0	1	7.65	104	268	4.44	2.39	112.134	2.22	3.09	0.83	0.93
0211	0	2	71	25	1	0	126	78	1	1	0	1	0	0	0	0	0	1	40.2052	58.9309	1	1	0	1	0	1	1	1	0	0	1	100	1	0	1	1	0	0	1	7.41	108	213	5.13	1.73	123.121	1.14	4.24	2.12	1.22
0212	0	1	49	23.9	1	0	105	75	0	0	0	0	0	0	0	1	0	0	138.513	153.569	1	1	0	1	0	1	0	1	1	1	1	95	1	0	2	0	1	0	1	13.91	151	205	12.74	0.74	277.027	1.72	4.41	2.27	1.04
0213	0	1	61	25.7	0	1	150	80	1	0	0	1	0	0	1	1	0	0	80.4808	80.4808	1	1	0	0	1	1	1	1	0	0	0	100	1	0	3	1	1	0	1	9.18	146	212	6.54	1.84	115.217	1.01	3.13	1.45	0.91
0214	1	1	61	25.3	1	0	151	80	1	0	0	1	0	0	0	1	0	0	153.264	92.7648	1	1	0	0	0	1	1	1	0	1	0	95	1	0	3	1	1	0	1	8.42	138	272	5.48	2.06	132.039	1.23	4.26	2.31	0.96
0215	0	1	77	23.7	0	1	138	82	0	1	0	0	1	0	0	0	1	0	82.6497	76.9101	1	1	0	1	0	1	0	1	0	1	0	95	1	0	2	1	1	0	1	5.35	118	248	3.64	1.27	195.276	2.02	4.14	1.73	1.1
0216	1	1	63	23.6	0	1	123	82	0	1	0	0	0	0	0	0	1	0	103.705	78.4434	1	1	0	1	0	1	0	1	0	1	0	75	1	0	3	1	1	0	1	5.77	125	110	3.94	1.17	94.0171	2.21	4.71	2.23	1.12
0217	0	1	67	26.6	0	1	142	74	1	1	0	1	0	0	0	1	0	1	56.7216	52.702	1	1	0	1	0	1	1	1	1	0	1	70	1	0	2	1	1	0	1	9.48	137	240	6.42	1.84	130.435	2.63	4.55	2.21	0.95
0219	0	2	73	23.1	1	0	180	100	1	0	0	1	0	0	0	1	0	0	70.9861	73.8835	1	1	0	1	0	1	0	1	1	1	1	90	0	0	2	1	1	0	1	8.27	134	193	7.19	0.68	283.824	1.01	5.2	2.84	1.59
0220	0	1	66	25.9	1	0	124	76	1	0	0	1	0	0	1	0	1	0	65.3068	82.617	1	1	0	1	0	1	0	1	0	1	1	90	1	0	3	1	1	0	1	6.86	138	131	4.54	1.65	79.3939	1.38	4.28	2.29	0.99
0221	0	2	71	24.7	1	0	140	80	0	0	0	0	0	0	0	0	0	0	69.3864	75.4729	1	1	0	1	0	1	0	1	0	0	1	100	1	0	1	1	0	0	1	3.87	121	197	2.62	0.92	214.13	1.15	4.93	2.79	1.44
0222	0	1	72	37.3	1	0	165	88	0	0	0	1	0	0	0	0	1	1	46.8201	54.3113	1	1	0	1	0	1	1	1	0	1	1	75	1	0	2	1	1	0	1	13.06	131	148	10.47	1.22	121.311	0.91	3.68	1.6	1.22
0223	0	1	43	22.9	1	0	107	74	0	0	0	0	0	0	0	1	0	0	100.009	95.4107	1	1	0	1	0	1	0	1	1	0	1	95	1	0	1	0	0	0	1	10.58	163	202	7.54	1.9	106.316	0.86	4.65	2.63	1.3
0224	0	1	61	23.6	1	0	120	80	0	0	0	0	1	0	0	1	0	0	69.6253	73.0216	1	1	0	1	0	1	0	1	1	0	0	90	1	0	3	0	1	0	1	6.72	158	203	4.83	1.22	166.393	1	3.67	2.04	0.96
0225	0	1	73	NA	1	0	134	74	0	0	0	0	0	0	0	0	1	0	NA	NA	1	0	1	1	0	1	0	1	1	0	1	90	0	0	4	0	1	1	1	7.56	122	226	5.22	1.4	161.429	1.37	5.91	3.33	1.29
0226	0	1	82	NA	1	0	104	56	0	1	0	1	0	0	0	1	0	0	NA	NA	1	1	0	0	0	0	0	1	1	1	1	90	1	0	3	0	1	0	1	13.27	136	77	12.3	0.53	145.283	1.32	3.8	2.06	1.08
0227	0	1	63	22.5	0	1	124	68	0	1	0	1	0	0	0	0	1	0	80.0122	83.491	1	1	0	1	0	1	0	1	1	0	1	100	1	0	3	1	1	0	1	6.36	135	235	4.1	1.3	180.769	0.75	2.19	1.1	0.56
0228	0	1	65	26.8	1	0	110	70	0	0	0	1	0	0	0	1	0	1	55.1451	86.4776	1	1	0	1	0	1	0	1	1	1	1	75	1	0	3	1	1	0	1	9.94	149	246	6.51	2.46	100	1.37	3.96	2.15	0.96
0229	0	1	67	22.8	1	0	121	82	1	0	0	1	0	0	1	1	0	1	58.3166	56.6344	1	0	1	1	0	1	0	1	1	1	1	75	1	0	1	0	0	0	1	9.98	146	208	7.91	0.93	223.656	NA	NA	NA	NA
0230	0	2	59	25	1	0	120	80	0	1	0	0	0	0	0	0	0	0	67.335	66.449	1	1	0	1	0	1	0	1	1	0	1	100	1	0	1	0	0	0	1	6.71	151	159	4.14	1.98	80.303	2.29	4	1.75	1.2
0231	1	2	69	19.3	0	1	170	100	1	0	0	1	0	0	0	0	1	1	39.3156	30.1817	1	1	0	1	0	1	1	1	0	1	1	75	1	0	2	1	1	0	1	7.74	121	218	6.4	0.63	346.032	1.3	5.62	2.95	1.35
0232	0	2	77	25	1	0	120	80	1	0	0	1	0	0	1	0	0	1	59.0103	74.8166	1	1	0	1	0	1	0	1	0	0	1	75	1	0	1	1	0	0	1	6.52	128	184	4.87	1.43	128.671	1.1	3.93	2.07	1.23
0233	0	2	77	19.7	1	0	118	76	0	0	0	0	0	0	1	1	0	0	64.1285	54.1776	1	1	0	0	0	1	0	1	0	0	1	85	1	0	3	1	1	0	1	15.97	126	293	14.6	0.74	395.946	1.11	3.72	1.86	1.18
0234	0	2	61	19.2	1	0	112	70	0	0	0	0	0	0	0	0	0	0	61.5678	92.3518	1	1	0	0	0	1	0	1	1	0	1	85	1	0	2	0	1	0	0	14.08	118	307	11.3	1.75	175.429	1.62	3.16	1.46	0.72
0235	0	1	50	26.6	1	0	60	40	1	1	0	1	0	0	0	0	0	1	40.0574	60.6752	1	1	0	0	0	1	0	1	1	0	1	75	1	0	2	1	1	0	1	26.13	127	201	24.03	1.03	195.146	4.15	4.01	1.28	0.82
0236	0	1	58	25.7	0	1	110	84	1	0	0	0	0	0	0	0	1	0	62.0984	66.1992	1	1	0	1	0	1	0	1	1	1	1	85	0	0	3	1	1	0	1	6.84	133	321	5.07	1.32	243.182	1.72	4.73	2.75	0.84
0237	0	1	53	26	1	0	119	62	1	0	0	0	0	0	0	0	0	0	120.86	124.637	1	1	0	1	0	1	0	1	1	1	1	100	1	0	3	1	1	0	1	9.9	148	225	7.91	1.43	157.343	1.48	5.16	3.66	1.01
0240	0	1	54	23.4	1	0	118	70	0	0	0	0	0	0	0	1	0	0	106.916	98.5636	1	1	0	0	0	1	0	1	1	0	1	100	1	0	4	0	1	1	1	13.37	138	304	12.64	0.51	596.078	1.64	6.39	3.66	1.25
0241	1	2	63	20.4	1	0	117	73	0	1	0	0	0	0	0	0	0	1	40.8951	32.5713	1	1	0	0	0	1	0	1	0	0	1	75	1	0	3	1	1	0	1	14.65	101	386	11.28	1.74	221.839	3.36	3.25	1.51	1
0242	0	1	53	20	0	1	135	90	0	0	0	0	0	0	0	0	0	0	104.613	104.613	1	0	1	1	0	1	0	1	1	1	0	95	1	0	4	1	1	1	1	6.07	150	211	4.18	1.5	140.667	2.45	5.87	3.79	1.84
0244	0	1	57	24.3	0	1	120	80	1	0	0	0	1	0	0	0	0	0	73.0999	80.932	1	0	1	1	0	1	0	1	1	0	1	90	1	0	1	1	0	0	1	8.84	73	309	6.56	1.67	185.03	1.47	3.72	2	1
0245	0	1	72	22.6	1	0	123	78	1	0	0	0	0	0	0	1	0	1	57.875	57.875	1	1	0	1	0	1	0	1	1	1	1	75	0	0	3	0	1	0	1	9.99	136	253	7.54	1.87	135.294	2.36	6.54	3.8	0.83
0246	0	1	65	25	1	0	142	84	0	1	0	0	0	0	0	1	0	0	78.1038	74.4283	1	1	0	1	0	0	0	1	0	1	1	95	1	0	3	1	1	0	1	8.02	129	180	5.35	1.97	91.3706	1.96	4.25	2.17	0.98
0247	0	2	68	26.3	1	0	160	100	1	0	0	1	0	0	0	0	0	0	62.1852	64.7063	1	1	0	1	0	1	1	1	0	1	1	85	0	0	3	1	1	0	1	4.21	68	291	2.47	1.37	212.409	1.89	4.02	1.95	1.05
0248	0	2	63	NA	1	0	208	106	1	1	0	1	1	0	1	0	0	0	NA	NA	1	0	1	1	0	1	1	1	1	1	1	90	1	0	3	1	1	0	1	5.74	95	183	4.02	1.33	137.594	7.91	9.86	1.14	0.41
0249	0	1	52	25.7	1	0	120	80	1	1	0	0	0	0	0	1	0	0	70.3791	80.1124	1	1	0	0	0	1	0	1	1	0	1	90	1	0	1	0	0	0	0	10.66	116	260	7.41	2.2	118.182	1.15	5.22	2.68	1.45
0250	0	1	58	27.9	1	0	142	90	1	1	0	1	0	0	0	0	0	0	92.9979	91.8908	1	1	0	1	0	1	0	0	1	1	1	95	1	0	3	1	1	0	1	12.05	149	201	9.84	1.46	137.671	1.53	4.49	2.37	1.03
0251	0	1	49	27.3	0	1	130	90	0	0	0	1	0	0	0	1	0	0	78.2849	91.8996	1	1	0	0	0	0	0	1	0	0	1	95	1	0	1	0	0	0	1	6.01	141	175	3.64	1.25	140	1.27	4.38	2.41	0.22
0252	0	2	67	22.2	1	0	128	60	1	0	0	0	0	0	0	0	0	0	62.1768	72.9382	1	1	0	0	1	0	0	1	0	1	0	85	1	0	2	1	1	0	1	11.62	114	140	9.61	1.32	106.061	1.98	4.68	2.02	1.25
0253	0	2	66	24.4	1	0	140	71	1	1	0	1	0	0	0	1	0	1	54.2207	52.8652	1	0	1	1	0	1	1	1	0	1	1	75	1	0	3	1	1	0	1	10.29	126	145	6.16	3.34	43.4132	2.4	5.69	4.05	1.3
0254	0	1	73	23.9	1	0	119	99	0	0	0	0	1	0	1	0	1	1	43.639	38.861	1	1	0	0	0	0	0	1	1	1	1	75	1	0	3	1	1	0	1	8.92	146	199	7.47	0.82	242.683	1.91	4.15	2.24	0.78
0255	0	2	48	27.8	0	1	100	85	1	1	0	1	0	0	0	0	0	0	125.361	120.802	1	1	0	1	0	1	0	1	0	0	1	100	1	0	2	1	1	0	0	5.91	123	285	3.52	2.07	137.681	2.79	6.27	3.2	1.17
0256	0	1	73	25.5	1	0	164	102	1	1	0	1	0	0	0	0	0	0	64.6983	60.4258	1	1	0	1	0	1	1	1	0	1	1	90	1	0	1	1	0	0	1	8.54	140	169	6.92	1.02	165.686	1.33	5.7	3.29	1.23
0257	0	1	74	18.6	1	0	99	51	1	0	0	0	0	0	1	1	0	1	46.7121	49.3073	1	1	0	0	0	0	0	1	1	0	1	75	1	0	2	1	1	0	1	26.02	146	234	22.38	3.26	71.7791	0.58	3.03	0.82	1.58
0258	0	2	60	20.8	0	1	120	80	1	1	0	1	1	0	0	0	0	1	59.3783	61.1247	1	1	0	0	1	0	0	1	1	1	1	75	1	0	3	1	1	1	1	5.89	115	161	5.07	0.51	315.686	3.08	5.31	2.94	1.21
0259	0	1	36	24	1	0	130	74	0	1	0	0	0	0	0	0	0	0	131.523	125.055	1	0	1	0	0	1	0	1	1	0	1	100	1	0	3	1	1	0	1	12.12	152	256	10.27	1.25	204.8	1.01	9.86	5.62	1.57
0260	0	1	65	17.9	1	0	110	60	0	1	0	0	0	0	0	1	0	0	67.8484	77.8588	1	1	0	0	0	1	0	1	0	0	1	90	1	0	1	0	0	0	1	4.99	132	259	3.5	0.99	261.616	0.99	4.28	2.29	1.13
0261	0	1	75	24.8	1	0	140	70	1	0	0	1	0	0	1	0	0	0	65.3802	67.0784	1	1	0	0	1	1	0	1	0	0	1	90	1	0	1	0	0	0	1	5.4	133	156	3.47	1.34	116.418	1.36	2.61	1.14	0.83
0262	0	1	68	20	1	0	135	75	0	0	0	0	0	0	0	0	1	0	70.9835	75.8789	1	1	0	1	0	1	0	1	0	0	1	90	1	0	3	0	1	0	1	9.69	115	242	8.54	0.66	366.667	0.44	4.73	2.49	1.32
0263	0	1	50	24.8	1	0	120	86	0	0	0	0	0	0	0	1	0	0	92.7917	105.503	1	1	0	1	0	0	0	1	1	1	1	95	1	0	2	0	1	0	1	9.29	155	234	4.4	3.74	62.5668	5.17	4.26	1.07	0.75
0264	0	2	63	20.1	0	1	144	84	1	0	0	1	0	0	0	0	0	1	40.4185	50.2641	1	0	1	1	0	0	1	1	0	1	0	75	1	0	3	1	1	0	1	5.36	134	172	3.54	1.37	125.547	1.38	5.14	2.78	1.22
0265	0	2	68	25.3	0	1	132	80	1	1	0	1	0	0	0	0	0	0	74.8166	59.8533	1	1	0	1	0	1	0	1	0	0	0	90	1	0	3	1	1	0	1	8.16	119	172	4.64	2.82	60.9929	1.66	5.02	2.41	1.33
0266	0	1	67	23.4	1	0	82	54	1	0	0	0	0	0	0	1	0	1	47.3852	52.4953	1	1	0	0	0	0	0	1	1	0	1	75	1	0	3	0	1	0	1	11.82	118	208	9.78	1.31	158.779	0.78	3.69	2.03	0.93
0267	0	1	67	24.2	0	1	100	65	1	1	0	0	0	0	0	0	1	0	80.1885	85.1232	1	1	0	0	0	0	0	1	0	0	0	95	1	0	4	1	1	1	1	4.64	139	240	2.45	1.64	146.341	1.11	4.86	2.82	1.1
0268	0	1	64	21.9	1	0	100	60	0	1	0	0	1	0	0	0	1	0	65.0367	60.7485	1	1	0	0	0	1	0	1	0	0	1	90	1	0	1	1	0	0	1	6.86	130	230	4.45	1.71	134.503	0.54	2.94	1.07	1.31
0269	0	2	64	24.3	0	1	166	78	1	1	0	1	0	0	0	0	0	0	96.2485	115.498	1	1	0	1	0	1	1	1	0	0	1	95	1	0	3	1	1	0	1	6.57	130	247	3.74	2.11	117.062	1.16	5.08	3.02	1.04
0272	0	2	77	21.8	1	0	140	70	1	1	0	1	1	0	0	0	0	1	45.8252	53.4627	1	1	0	1	0	0	0	1	0	1	1	75	1	0	2	0	1	0	1	6.28	117	296	3.88	1.81	163.536	1.07	3.66	1.58	1.22
0273	0	1	58	26	1	0	155	86	0	1	0	1	0	0	0	1	0	0	97.6407	100.244	1	0	1	0	1	1	1	1	1	0	1	100	1	0	3	1	1	0	1	18.59	146	290	16.27	1.34	216.418	1.92	5.81	2.8	1.26
0274	0	1	47	25	0	1	108	72	0	0	0	0	1	0	0	0	0	0	84.6079	71.3361	1	1	0	1	0	1	0	1	0	0	1	95	1	0	3	1	1	0	1	6.65	146	221	3.92	2.24	98.6607	0.91	2.75	1.25	0.91
0275	0	1	50	25.7	1	0	126	70	1	0	0	1	0	0	1	0	1	0	67.5589	70.6579	1	1	0	1	0	1	0	1	0	0	1	90	1	0	2	1	1	0	1	5.52	141	152	3.98	0.95	160	1.04	3.19	1.38	1.12
0276	0	2	49	20.9	1	0	90	60	1	1	0	1	0	0	0	0	0	0	105.265	109.393	1	0	1	0	0	1	0	1	0	0	1	95	1	0	2	0	1	0	1	10.1	125	221	8.94	0.82	269.512	1.83	7.24	3.97	1.55
0277	0	1	59	28.9	0	1	132	70	1	0	0	1	0	0	0	0	0	0	115.768	121.112	1	1	0	0	1	1	1	1	0	0	1	100	1	0	3	1	1	0	1	7.89	137	323	3.81	3.55	90.9859	2.92	5.32	2.48	1
0278	0	1	33	28.8	1	0	100	52	1	0	0	0	0	0	0	1	0	0	128.964	115.905	1	1	0	1	0	1	0	1	0	0	0	100	1	0	2	1	1	0	0	8.73	148	323	4.61	3.68	87.7717	4.05	6.7	2.43	1.5
0279	0	1	62	25.3	1	0	126	72	0	1	0	0	0	0	0	1	0	0	83.1296	83.1296	1	1	0	1	0	1	0	1	0	1	1	95	1	0	3	1	1	0	1	6.96	153	113	5.78	0.71	159.155	3.22	3.87	1.65	0.74
0280	0	1	48	25.5	1	0	118	70	0	1	0	1	1	0	0	0	1	0	88.1615	107.882	1	0	1	1	0	1	0	1	0	0	0	95	1	0	2	0	1	0	1	7.33	145	247	4.28	2.23	110.762	1.78	3.15	1.48	0.85
0281	0	1	73	22.6	1	0	100	60	1	1	1	1	0	0	0	0	0	1	41.2892	39.0487	1	0	1	0	1	1	0	1	1	0	1	100	1	0	2	1	1	1	1	3.75	130	179	2.64	0.79	226.582	1.04	3.43	1.65	1.18
0282	0	1	72	22.8	1	0	155	92	0	1	0	1	0	0	0	0	1	0	67.6912	72.8983	1	1	0	0	1	1	0	1	0	0	1	90	1	0	1	0	0	0	1	9.44	148	201	7.38	1.15	174.783	1.57	3.32	1.53	0.94
0283	0	2	68	23.8	0	1	143	73	1	1	0	1	0	0	0	0	0	0	66.6076	92.2259	1	1	0	0	1	0	1	1	1	0	0	100	1	0	2	1	1	0	1	6.09	145	205	3.74	1.94	105.67	0.75	2.53	0.9	0.96
0285	0	1	49	21.8	1	0	174	123	0	0	0	1	0	0	0	1	0	0	NA	96.7365	1	1	0	1	0	1	1	1	1	0	1	70	1	0	3	0	1	0	1	8.77	124	211	7.38	0.99	213.131	1.45	5.16	2.86	1.12
0287	0	1	46	27	1	0	136	90	0	0	0	0	0	0	0	1	0	0	136.339	121.879	1	0	1	1	0	1	0	1	1	1	1	100	1	0	3	0	1	0	1	8.7	140	229	6.51	1.29	177.519	1.88	5.17	2.85	1.04
0288	0	1	57	19.8	1	0	154	80	1	0	0	1	0	0	0	1	0	0	77.8377	72.8481	1	1	0	1	0	1	1	1	1	1	1	75	1	0	2	1	1	0	1	6.58	136	237	5.23	1.04	227.885	0.64	4.25	1.91	1.64
0289	0	1	65	25.6	1	0	160	90	1	1	0	1	0	0	0	1	0	1	56.5403	69.2331	1	1	0	1	0	1	1	1	0	1	0	75	1	0	3	1	1	0	1	13.03	149	183	9.02	2.84	64.4366	2.38	4.75	NA	0.98
0290	0	1	76	22.6	1	0	135	72	1	1	0	0	0	0	0	0	0	0	91.2795	86.9329	1	0	1	1	0	1	0	1	1	1	1	95	1	0	3	0	1	0	1	10.44	136	176	9.76	0.52	338.462	0.85	4.05	2.53	0.87
0292	1	1	66	23.1	1	0	100	60	1	0	0	0	0	0	0	1	0	1	38.4956	43.7732	1	0	1	0	0	1	0	1	0	1	1	75	1	0	3	1	1	0	1	11.16	134	197	6.78	3.6	54.7222	2.97	6	2.9	1.12
0293	0	1	57	26.4	1	0	148	90	0	0	0	1	0	0	0	1	0	0	88.9402	88.9402	1	0	1	1	0	1	0	1	1	0	1	95	1	0	2	1	1	0	1	11.69	145	157	9.38	1.66	94.5783	0.64	4.87	2.71	1.27
0294	0	1	50	23.9	0	1	140	94	0	0	0	1	1	0	0	0	1	0	66.8373	70.1136	1	1	0	1	0	1	0	1	0	0	1	90	1	0	3	0	1	0	1	7.34	177	286	4.3	2.54	112.598	2.34	4.92	2.72	0.91
0295	0	1	64	31	0	1	142	90	0	1	0	1	1	0	0	1	0	0	116.137	133.733	1	0	1	0	0	1	1	1	1	0	0	100	1	0	3	1	1	0	1	5.76	145	141	3.5	1.49	94.6309	2.04	4.92	2.73	1.07
0296	1	2	73	NA	1	0	90	63	0	0	0	1	0	0	0	0	0	0	NA	NA	1	0	1	1	0	1	0	1	1	0	1	90	1	1	3	1	1	0	1	9.46	91	165	7.97	0.63	261.905	0.68	3.55	1.53	1.38
0297	0	2	65	22.1	1	0	150	80	0	1	1	1	0	0	0	0	0	0	62.5834	66.621	1	0	1	0	1	1	1	1	0	1	1	85	1	0	2	0	1	0	1	5.72	128	188	3.37	1.89	99.4709	1.61	3.2	1.4	1.13
0298	0	1	59	24.6	1	0	150	112	1	0	0	1	0	0	0	1	0	0	74.2665	84.3025	1	1	0	1	0	0	1	1	0	1	0	90	1	0	2	1	1	0	1	5.22	145	190	2.82	1.73	109.827	1.37	3.69	1.93	1.07
0299	0	1	76	27.5	1	0	160	100	1	1	0	1	0	0	0	0	1	1	30.8841	33.1524	1	1	0	0	1	1	1	1	1	1	1	70	1	0	4	1	1	1	1	3.76	121	110	2.43	0.87	126.437	0.97	3.39	1.55	1.22
0300	0	1	53	23.4	1	0	121	74	1	0	0	0	0	0	0	1	0	0	78.7829	80.7774	1	0	1	1	0	1	0	1	1	0	1	95	1	0	2	1	1	0	1	15.21	143	257	11.13	2.77	92.7798	3.16	4.8	1.98	0.98
0301	0	2	78	20.8	1	0	120	70	1	1	0	1	0	0	0	0	0	1	42.9503	47.3716	1	1	0	0	0	1	1	1	0	1	1	75	1	0	2	1	1	0	1	7.53	122	117	5.31	1.49	78.5235	0.97	4.42	2.48	1.13
0302	0	1	56	21.3	1	0	134	81	0	0	0	0	0	0	0	1	0	0	94.5395	93.0623	1	0	1	1	0	1	0	1	1	0	1	95	1	0	1	0	0	0	0	5.87	139	199	4.55	0.6	331.667	0.73	4.9	2.62	1.46
0303	1	1	39	28.3	1	0	145	84	1	0	0	1	0	0	0	1	0	0	329.258	121.948	1	0	1	1	0	1	1	1	0	1	1	100	1	0	3	1	1	0	1	17.67	162	255	14.63	1.73	147.399	2.04	6.01	3.19	1.15
0304	0	1	50	29.8	1	0	138	88	1	0	0	0	0	0	0	0	0	0	90.9386	125.521	1	1	0	1	0	1	0	1	1	0	0	95	1	0	1	1	0	0	1	7.22	161	248	58.1	0.96	258.333	1.84	3.57	1.61	1.03
0305	0	1	47	25.6	1	0	110	70	1	1	0	0	0	0	0	0	1	0	93.48	84.9818	1	1	0	1	0	1	0	1	0	1	1	95	1	0	3	0	1	0	1	10.11	149	213	6.91	2.38	89.4958	1.43	5.3	3.26	0.9
0306	0	1	75	26.7	1	0	160	110	0	0	0	1	0	0	0	0	0	0	81.5728	94.9211	1	1	0	1	0	0	0	1	0	1	1	95	1	0	2	1	1	0	1	13.05	131	446	9.53	1.97	226.396	0.9	4.92	2.61	1.08
0307	0	1	59	24.7	1	0	160	100	1	0	0	1	1	0	0	0	1	1	44.2505	49.511	1	1	0	1	0	1	0	1	0	1	0	75	1	0	2	1	1	0	1	9.91	161	145	7.64	1.43	101.399	7.48	4.31	0.64	0.65
0309	0	1	63	26.2	0	1	146	85	1	0	0	1	0	0	0	1	0	0	68.9572	63.0885	1	1	0	1	0	0	0	1	0	0	1	90	1	0	3	1	1	0	1	8.06	138	266	6.07	1.37	194.161	0.82	5.73	3.21	1.51
0310	0	2	68	22.7	0	1	142	72	0	1	0	1	0	0	0	0	0	0	80.3586	71.1371	1	1	0	1	0	1	1	1	1	1	1	95	1	0	4	0	1	1	1	5.86	131	261	3.81	1.53	170.588	2.15	4.99	2.55	0.94
0312	0	2	69	23.1	1	0	120	70	1	1	0	1	0	0	0	0	0	1	48.5624	78.2945	1	1	0	1	0	1	0	1	0	1	1	75	1	0	3	1	1	0	1	6.91	105	231	4.01	2.17	106.452	1.79	5.89	3.42	0.95
0313	0	1	52	23.3	1	0	128	80	0	0	0	0	0	0	0	1	0	0	78.9679	85.3216	1	1	0	0	0	0	0	1	0	0	0	95	1	0	1	0	0	0	1	8.69	155	195	5.39	2.55	76.4706	3.24	4.87	2.14	0.9
0314	0	2	52	20	1	0	100	70	0	0	0	0	0	0	0	0	0	0	69.6705	68.5819	1	1	0	1	0	1	0	1	0	1	0	90	1	0	3	1	1	0	1	5.88	117	331	3.88	1.37	241.606	1.09	3.95	1.88	1.15
0315	0	1	75	24.2	1	0	196	100	0	0	1	1	1	0	0	1	0	1	59.8102	61.8039	1	1	0	1	0	0	1	1	0	1	1	75	1	0	3	1	1	0	1	6.9	144	246	4.55	1.7	144.706	0.79	2.92	1.35	1
0316	0	1	63	24.6	1	0	118	70	0	1	0	1	0	0	0	0	1	0	69.7875	84.3266	1	1	0	1	0	1	1	1	1	1	1	90	1	0	4	1	1	1	1	7.04	144	168	4.92	1.5	112	0.91	3.46	1.72	0.99
0318	0	1	49	30.8	1	0	174	108	0	0	0	1	0	0	0	0	0	0	128.584	123.762	1	1	0	1	0	1	1	1	0	1	0	100	1	0	3	1	1	0	1	7.89	153	267	3.98	1.97	135.533	1.41	4.5	2.75	0.89
0319	0	1	59	21.3	1	0	102	62	0	0	0	1	0	0	0	1	0	0	86.1061	91.4049	1	1	0	0	0	1	0	1	0	1	1	95	1	0	3	1	1	0	1	3.66	111	124	2.69	0.65	190.769	1.19	4.48	2.3	0.99
0323	0	1	47	23.5	1	0	120	70	0	0	0	0	0	0	0	0	1	0	86.7971	81.5366	1	1	0	0	0	1	0	1	0	0	1	95	1	0	2	1	1	0	1	5.25	150	238	3.28	1.57	151.592	2.36	4.61	1.99	1.24
0324	0	1	64	19.6	1	0	160	96	1	1	0	1	0	0	1	1	0	0	83.8767	86.2731	1	0	1	1	0	1	0	1	0	1	0	95	1	0	2	1	1	0	0	6.21	154	161	3.99	1.69	95.2663	1.04	4.31	2.48	0.9
0326	0	2	67	25	1	0	149	81	0	0	0	1	0	0	0	0	0	0	70.0207	85.8744	1	0	1	1	0	1	0	1	0	1	1	90	1	0	2	0	1	0	1	10.99	113	215	9.69	0.88	244.318	1.13	4.13	2.18	1.04
0327	0	1	52	28.5	1	0	144	88	0	0	0	1	0	0	0	0	0	0	77.9197	109.703	1	0	1	0	1	1	1	1	1	1	1	95	1	0	2	1	1	0	1	8.45	134	202	7.42	0.68	297.059	2.73	4.73	2.17	0.81
0328	0	1	54	24.9	1	0	124	90	0	0	0	0	1	0	0	1	0	0	85.0526	94.621	1	1	0	1	0	1	0	1	0	0	1	95	1	0	2	0	1	0	1	10.54	152	298	7.7	1.93	154.404	1.54	3.09	1.37	0.87
0330	0	1	69	23	1	0	134	78	1	1	0	1	0	0	1	0	1	0	80.016	75.3092	1	1	0	1	0	1	0	1	0	0	1	95	1	0	4	1	1	1	1	5.66	133	201	2.97	1.81	111.05	1.05	3.28	1.66	1.04
0331	0	2	57	21.1	1	0	90	61	0	0	1	0	0	0	0	0	0	0	60.4849	69.5125	1	0	1	0	0	1	0	1	1	0	1	85	1	0	3	1	1	1	1	6.87	117	177	6.11	0.63	280.952	1.89	7.63	3.93	1.71
0333	0	2	73	18	1	0	148	69	1	1	0	1	0	0	1	0	0	1	29.9963	44.7564	1	1	0	1	0	1	0	1	1	1	1	70	1	0	3	1	1	0	1	6.13	120	227	3.96	1.33	170.677	1.12	4	1.59	1.69
0334	0	2	61	25.7	1	0	150	80	0	1	0	1	0	0	0	0	0	0	78.7169	82.0905	1	1	0	1	0	0	1	1	0	1	0	95	1	0	2	1	1	0	0	4.9	131	171	3.08	1.43	119.58	2.31	3.99	1.95	0.92
0335	0	1	50	27	1	0	160	100	1	1	0	1	0	0	0	1	0	0	176.039	146.699	1	1	0	1	0	1	0	1	0	1	0	100	1	0	3	1	1	0	1	6.86	148	167	4.08	2.21	75.5656	6.66	6.22	1.11	0.98
0336	0	1	48	25.8	1	0	120	80	0	1	0	0	0	0	0	1	0	0	99.7497	111.72	1	1	0	0	0	0	0	1	0	0	0	95	1	0	3	1	1	0	1	6.09	155	223	2.78	2.59	86.1004	1.41	7.03	4.63	1.05
0337	0	1	43	22.2	1	0	130	80	0	0	0	0	0	0	0	1	0	0	86.495	106.552	1	1	0	1	0	1	0	1	1	1	1	95	1	0	1	0	0	0	1	7.2	145	454	4.39	1.82	249.451	1.17	5.33	3.24	1.22
0338	0	1	50	24.7	1	0	130	88	0	0	0	1	1	0	0	0	1	0	90.2448	93.3928	1	0	1	0	1	1	1	1	0	1	0	95	1	0	3	0	1	0	1	5.82	134	187	3.95	1.47	127.211	0.87	3.01	1.4	1.1
0339	0	2	73	21.3	0	1	138	62	1	0	0	1	1	0	0	0	0	1	46.414	46.414	1	1	0	1	0	1	0	1	0	0	0	75	1	0	2	0	1	0	1	5.52	134	173	3.47	1.59	108.805	0.98	3.56	1.48	1.52
0340	0	1	44	27.5	1	0	113	71	0	1	0	1	0	0	0	1	0	0	105.134	144.184	1	0	1	1	0	1	1	1	1	1	1	95	1	0	3	0	1	0	1	12.77	157	205	9.45	2.62	78.2443	1.19	7.55	5.43	1.05
0341	0	1	65	26.1	1	0	100	46	0	0	0	0	0	0	0	1	0	0	72.5436	70.2284	1	1	0	0	0	0	0	1	1	1	1	90	1	0	1	0	0	0	0	9.2	125	198	6.37	2.01	98.5075	0.86	3.87	2.6	0.78
0342	0	1	72	27	1	0	148	78	0	0	0	1	0	0	0	1	0	1	56.8407	67.1754	1	1	0	1	0	1	0	1	1	1	1	75	1	1	3	1	1	0	1	11.88	108	211	10.46	5.2	40.5769	0.66	4.06	2.36	0.98
0343	0	2	74	22	1	0	154	68	0	0	0	1	0	0	0	0	0	1	57.1516	65.0346	1	1	0	0	1	1	0	1	0	1	1	100	1	0	2	1	1	0	1	5.52	122	255	3.85	1.15	221.739	1.38	5.4	2.69	1.52
0344	0	1	33	23	1	0	100	70	0	0	0	0	0	0	0	0	0	0	89.4994	102.439	1	1	0	1	0	1	0	1	0	0	1	95	1	0	2	1	1	0	1	6.67	148	257	5.21	1.1	233.636	2.07	3.34	1.67	0.71
0347	0	1	63	29.2	1	0	182	94	0	1	0	1	0	0	0	0	1	0	72.9523	94.7433	1	1	0	1	0	1	1	1	0	0	1	90	1	0	3	1	1	0	1	6.51	131	139	4.69	1.07	129.907	1.34	4.29	2.53	0.85
0348	0	1	61	25.2	1	0	125	70	0	0	0	0	0	0	0	1	0	0	93.7777	92.438	1	1	0	1	0	1	0	1	0	1	1	95	1	0	1	1	0	0	1	4.61	155	168	2.78	1.21	138.843	1.49	3.24	1.68	0.87
0349	0	2	65	24.8	1	0	158	88	1	0	0	1	0	0	0	0	0	0	70.0276	84.7703	1	1	0	1	0	1	0	1	0	1	1	90	1	0	3	1	1	0	1	7.93	139	354	6.05	1.36	260.294	2.12	5.08	2.85	1.01
0350	0	1	60	27.4	1	0	120	70	1	1	0	0	0	0	0	1	0	0	100.307	108.666	1	1	0	1	0	1	0	1	0	0	1	100	1	0	2	1	1	0	1	9.03	139	167	5.09	3.19	52.3511	1.2	3.35	1.72	0.82
0351	0	1	51	38.1	1	0	120	88	0	1	0	1	0	0	0	1	0	0	137.566	170.975	1	0	1	1	0	0	0	1	0	1	1	100	1	0	3	1	1	0	1	8.41	152	264	4.84	2.74	96.3504	1.54	3.52	1.82	0.93
0352	0	1	53	27.1	1	0	110	70	0	0	0	1	1	0	0	1	0	0	87.7703	103.912	1	1	0	0	1	1	1	1	1	0	1	95	1	0	3	0	1	0	1	4.81	128	186	2.77	1.38	134.783	0.77	2.99	1.32	1.1
0353	0	1	73	23.7	1	0	150	80	0	1	0	1	0	0	0	0	1	1	58.3806	77.2926	1	1	0	0	1	1	1	1	0	0	1	75	0	0	1	1	0	0	1	6.59	148	190	3.25	2.9	65.5172	0.92	4.61	2.66	1.05
0354	0	1	63	22.4	1	0	142	95	0	0	0	1	0	0	0	1	0	0	62.931	70.0107	1	1	0	1	0	1	0	1	0	1	1	85	1	0	3	0	1	0	1	6.17	164	174	3.36	2.35	74.0426	2.93	5.67	2.86	1
0355	0	1	49	23.6	1	0	125	85	0	1	0	0	0	0	0	0	0	1	43.4673	41.0223	1	1	0	1	0	1	0	1	0	1	0	75	1	0	2	1	1	0	0	7.96	154	291	4.48	2.57	113.23	1.89	5.41	3.02	1.2
0356	0	2	58	25.9	0	1	120	70	1	1	0	0	0	0	0	0	0	0	114.215	124.839	1	1	0	0	0	1	0	1	0	1	0	100	1	0	1	0	0	0	1	5.84	132	137	3.49	1.91	71.7277	2.32	4.97	2.37	1.33
0357	0	1	73	22.8	1	0	136	78	1	1	0	0	0	0	0	1	0	0	67.5733	67.5733	1	1	0	0	0	0	0	1	0	0	1	90	1	0	1	0	0	0	1	5.65	152	159	3.73	1.31	121.374	0.9	4.53	2.68	1.17
0358	0	1	48	26.2	1	0	134	72	0	1	0	1	0	0	0	1	0	0	119.61	125.591	1	0	1	1	0	1	0	1	1	0	1	100	1	0	2	1	1	0	1	23.95	150	279	20.52	1.81	154.144	1.53	6.19	3.57	1.53
0359	0	1	57	23.5	1	0	130	90	1	0	0	1	0	1	1	0	0	0	71.5609	242.796	1	1	0	1	0	1	0	1	0	1	1	90	1	0	3	1	1	0	1	5.96	144	142	3.36	2	71	1.13	3.81	2.01	1.18
0360	0	2	50	21.5	1	0	142	90	0	1	0	1	0	0	0	0	0	0	100.856	122.468	1	1	0	0	0	1	1	1	0	0	1	100	1	0	2	1	1	0	1	10.99	148	229	8.21	1.8	127.222	2.29	6.79	3.47	1.36
0361	0	2	65	18.9	1	0	118	66	0	0	0	0	0	0	0	0	0	1	39.9291	56.7414	1	1	0	0	0	1	0	1	0	0	1	75	1	0	4	1	1	1	1	6.99	120	191	4.34	2.13	89.6714	0.92	4.91	2.23	1.65
0362	0	2	65	21.4	1	0	127	78	0	0	0	0	0	0	0	0	0	0	69.8465	64.945	1	1	0	1	0	1	0	1	0	1	1	90	0	0	1	0	0	0	0	5.81	128	297	4.01	1.5	198	0.93	3.36	1.67	1.1
0363	0	1	69	24.8	1	0	102	68	0	1	0	0	0	0	0	0	0	0	66.0412	71.4799	1	1	0	0	0	1	0	1	1	1	1	90	1	0	3	1	1	0	1	6.45	141	116	4.78	0.95	122.105	1.44	4.6	2.8	0.99
0364	0	1	53	25.5	1	0	132	78	1	1	0	0	0	0	1	1	0	0	78.3068	89.074	1	1	0	1	0	0	0	1	1	1	1	95	1	0	1	0	0	0	1	4.91	146	174	2.77	1.55	112.258	1.43	4.11	1.95	1.25
0365	0	2	71	26.6	1	0	120	80	0	0	0	1	0	0	0	0	0	1	47.7995	65.8223	1	1	0	1	0	1	0	1	0	1	1	75	1	0	2	1	1	0	1	6.02	126	269	3.72	1.8	149.444	1.32	4.88	2.53	1.67
0366	0	1	72	24	1	0	94	63	1	0	0	0	0	0	0	1	0	1	45.2431	52.1681	1	0	1	1	0	1	0	1	0	0	1	75	1	0	3	1	1	0	1	6.71	129	187	4	1.8	103.889	1.24	3.91	2.51	0.89
0367	0	1	69	26.1	1	0	137	70	0	0	0	1	0	0	0	1	0	1	50.7998	57.9927	1	0	1	1	0	1	0	1	0	0	1	75	0	0	3	1	1	0	1	7.1	152	288	4.53	1.57	183.439	0.66	2.52	1.34	0.74
0368	0	1	53	21	1	0	94	54	0	0	0	0	0	0	0	1	0	0	76.0765	72.6573	1	0	1	0	0	1	0	1	1	0	1	95	1	0	1	0	0	0	1	19.4	126	273	16.7	1.73	157.803	2.32	5.3	2.86	1.11
0369	0	1	64	22.2	1	0	100	50	0	0	0	1	0	0	0	1	0	0	76.4446	79.4621	1	1	0	0	0	0	0	1	1	1	1	95	1	0	3	1	1	0	1	9.5	118	244	7.92	1.12	217.857	1.79	5.46	3.54	0.85
0370	0	2	69	25.4	1	0	144	84	0	0	0	1	0	0	0	0	0	1	51.0164	78.6154	1	1	0	0	1	0	1	1	0	0	1	75	1	0	2	1	1	0	1	9.53	127	209	7.05	1.98	105.556	1.78	4.27	2.47	0.98
0371	0	1	49	26.8	1	0	120	80	0	1	0	0	0	0	0	1	0	0	116.952	118.471	1	1	0	1	0	1	0	1	1	0	1	100	1	0	1	1	0	0	0	6.07	133	116	2.88	2.68	43.2836	1.01	2.44	1.06	0.96
0372	0	2	53	25.2	0	1	160	90	1	1	0	1	0	0	1	0	0	0	83.359	110.666	1	1	0	1	0	1	1	1	1	1	1	100	1	0	4	1	1	1	1	7.09	126	247	4.51	2.09	118.182	1.51	4.31	2.51	0.96
0373	0	2	52	24.7	1	0	144	86	0	0	0	1	0	0	0	0	0	0	117.046	124.518	1	1	0	0	1	1	0	1	0	1	1	100	1	0	3	1	1	0	1	7.09	130	344	5.17	1.41	243.972	1.98	3.57	1.89	0.81
0374	0	1	63	21.2	0	1	138	82	1	0	0	1	1	0	0	0	1	1	54.4489	66.1165	1	1	0	1	0	1	0	1	0	0	0	75	1	0	3	1	1	0	1	7.73	149	211	5.66	1.48	142.568	0.84	4.42	2.35	1.38
0375	0	1	61	27.7	1	0	130	72	0	1	0	1	0	0	0	0	1	1	51.349	59.281	1	1	0	1	0	1	0	1	0	0	0	75	1	0	3	1	1	0	1	6.07	126	231	4.3	1.24	186.29	1.23	3.32	1.75	1.15
0377	0	1	61	21.4	1	0	96	57	0	0	0	0	0	0	0	1	0	1	57.4819	73.8039	1	0	1	0	0	1	0	1	1	0	1	75	1	0	4	1	1	1	1	10.08	135	273	7.19	1.91	142.932	1.58	4.42	2.77	0.92
0378	0	1	76	29.8	1	0	140	75	0	1	0	1	1	0	0	1	0	0	64.5477	82.621	1	1	0	1	0	0	1	1	0	0	1	90	1	0	2	0	1	0	1	6.35	142	248	3.37	2.42	102.479	1.06	3.23	3.11	1.17
0379	0	1	52	30	1	0	116	70	0	0	0	0	0	0	0	0	1	0	97.757	81.0238	1	1	0	1	0	1	0	1	0	0	1	95	1	0	1	0	0	0	1	5.94	147	202	3.61	1.83	110.383	2.72	5.42	1.01	0.19
0380	0	1	35	26.2	1	0	125	80	0	0	0	1	0	0	0	1	0	0	147.443	181.846	1	1	0	1	0	1	0	1	1	1	1	100	1	0	2	1	1	0	1	9.02	156	258	6.31	2.11	122.275	2.72	6.41	3.86	1.15
0381	0	1	65	21.6	1	0	110	60	0	0	0	0	0	0	0	1	0	1	38.0659	45.9963	1	1	0	0	0	0	0	1	1	1	0	75	1	0	2	0	1	0	1	4.81	118	140	2.25	1.97	71.066	0.7	3.96	2.18	1.14
0382	0	1	55	26.2	0	1	120	80	0	1	0	1	0	0	0	1	0	0	72.2617	88.5003	1	1	0	1	0	1	1	1	0	0	0	100	1	0	3	1	1	0	1	5.6	122	227	3.15	1.85	122.703	0.83	3.48	1.68	1.19
0383	0	2	77	19.6	1	0	162	78	1	0	0	1	0	0	0	0	0	1	37.5224	46.6187	1	1	0	0	1	1	0	1	0	1	0	75	1	0	2	1	1	0	1	9.04	130	230	7.39	1.29	178.295	1.81	6.07	3.19	1.71
0384	0	1	59	31.8	1	0	135	89	1	1	0	1	0	0	0	0	0	0	96.9152	95.895	1	1	0	0	1	1	1	1	0	0	0	95	1	0	1	0	0	0	1	9.52	140	249	6.21	2.36	105.508	1.46	6.07	3.87	1.36
0385	0	2	78	18	1	0	140	70	1	0	0	1	1	0	0	0	0	1	45.2991	61.6839	1	1	0	0	1	0	1	1	0	0	0	75	1	0	2	1	1	0	1	5.78	115	151	3.83	1.43	105.594	1.26	5.93	3.54	1.41
0386	1	2	55	24.1	0	1	200	102	0	1	0	1	0	0	0	0	0	0	79.7644	56.9746	1	1	0	1	0	1	1	1	0	0	0	95	1	0	3	1	1	0	1	7.45	119	253	4.87	1.45	174.483	0.86	5.17	3.04	1.25
0387	0	1	56	25.9	1	0	130	80	1	1	0	0	0	0	0	0	1	0	78.4594	69.8289	1	0	1	1	0	1	0	1	0	0	1	95	1	0	3	1	1	0	1	11.77	147	297	9.94	1.11	267.568	NA	NA	NA	NA
0388	0	1	68	23.1	1	0	140	86	0	0	0	1	1	0	0	0	1	0	70.0727	58.6478	1	1	0	1	0	1	0	1	1	1	1	90	1	0	3	0	1	0	1	5.15	127	169	3.51	1.29	131.008	0.49	3.46	1.84	1.29
0389	0	2	54	26.3	1	0	173	82	0	0	0	1	0	0	0	0	0	0	129.984	112.143	1	1	0	1	0	1	1	1	1	0	1	100	1	0	3	1	1	0	1	7.42	96	284	5.34	1.69	168.047	1.58	4.11	2.05	1.32
0390	0	1	42	25.7	1	0	140	90	0	1	0	1	0	0	0	0	0	0	87.7355	91.4297	1	1	0	1	0	1	0	1	0	0	1	95	1	0	2	1	1	0	1	7.11	144	236	4.68	1.8	131.111	2.12	4.46	2.33	0.95
0391	0	2	68	23.8	1	0	120	80	0	0	0	0	0	0	0	0	0	0	66.1422	81.4967	1	1	0	1	0	0	0	1	1	0	1	90	1	0	1	0	0	0	1	4.16	128	127	2.58	1.18	107.627	1	4.51	2.14	1.73
0392	0	1	66	20.8	0	1	134	78	1	0	0	1	1	0	1	1	0	1	48.8011	55.9928	1	1	0	1	0	1	0	1	0	1	1	75	1	0	2	1	1	0	1	5.05	130	132	2.87	1.77	74.5763	0.94	3.45	1.83	1.15
0393	0	1	68	19.7	1	0	110	66	1	1	0	1	0	0	0	0	1	1	51.2641	51.8337	1	1	0	0	0	1	0	1	1	1	1	75	1	0	3	1	1	0	1	6.91	113	400	4.56	1.83	218.579	1.28	3.78	2.19	0.8
0394	0	1	49	23.7	1	0	116	73	1	0	0	0	1	0	0	1	0	0	112.564	133.67	1	1	0	1	0	0	0	1	0	1	1	100	1	0	3	1	1	0	1	8.39	154	230	5.36	2.65	86.7925	1.29	4.31	2.67	0.87
0395	0	1	68	20.1	1	0	130	74	1	1	0	1	0	0	0	0	1	0	67.8428	76.0307	1	1	0	1	0	0	1	1	1	1	1	100	1	0	2	1	1	0	1	4.32	118	176	2.95	0.9	195.556	0.68	2.81	1.33	1.2
0396	1	1	60	19.6	1	0	83	54	0	0	1	0	0	0	0	1	0	1	50.9806	40.6117	1	1	0	1	0	0	0	1	1	0	1	75	1	0	2	0	1	0	1	5.43	112	184	3.26	1.64	112.195	0.67	4.84	2.51	1.57
0397	0	1	82	20.2	1	0	141	75	0	1	0	1	0	0	0	0	1	1	30.2307	32.2294	1	0	1	0	1	1	1	1	0	0	1	70	1	0	2	0	1	0	1	5.78	132	197	4.14	1	197	1.31	4.01	2.28	1.1
0398	0	1	68	21.9	1	0	100	60	0	0	0	0	0	0	0	0	1	0	68.331	83.7605	1	1	0	1	0	1	0	1	1	1	1	90	1	0	2	0	1	0	0	3.21	134	124	1.79	1.04	119.231	1.49	2.59	1.22	0.85
0399	0	1	62	22.6	1	0	120	78	0	0	0	1	0	0	0	1	0	0	68.9918	70.6543	1	1	0	1	0	1	0	1	0	0	0	90	1	0	1	1	0	0	1	9.99	129	211	7.26	2.02	104.455	0.62	4.02	1.96	1.47
0400	0	2	79	27.2	1	0	131	64	0	1	0	1	0	0	0	1	0	0	73.0554	67.348	1	0	1	1	0	1	0	1	1	1	1	95	1	0	3	1	1	0	1	10.71	122	148	7.86	1.89	78.3069	1.38	3.97	NA	1.3
0401	0	2	66	20.1	1	0	169	78	0	0	0	1	0	0	0	0	0	1	39.2484	50.238	1	1	0	1	0	1	1	1	1	1	1	75	1	0	2	1	1	0	1	7.11	85	204	4.84	1.89	107.937	2.4	4.58	2.24	1.28
0402	0	1	73	23.7	1	0	143	86	1	1	0	1	0	0	0	1	0	0	75.4407	74.461	1	1	0	1	0	1	0	1	1	1	1	95	1	0	2	1	1	0	1	10.37	133	408	8.35	1.03	396.117	1.23	4.63	2.33	1.31
0403	0	1	55	30.9	1	0	170	120	1	0	0	1	0	0	0	0	0	0	73.9712	103.912	1	0	1	0	1	1	1	1	0	0	1	90	1	0	2	0	1	0	1	4.54	149	162	2.99	1.07	151.402	3.8	4.15	1.8	0.75
0404	0	1	74	30.7	1	0	120	93	1	1	0	1	0	0	0	0	1	0	69.5812	86.1858	1	1	0	1	0	1	1	1	0	1	1	90	1	0	1	0	0	0	1	6.83	143	151	5.18	0.73	206.849	1.38	3.9	2.1	1.04
0405	0	1	46	24	1	0	90	59	0	0	0	0	0	0	0	1	0	0	74.1383	97.1108	1	1	0	1	0	0	0	1	0	0	1	90	1	0	2	0	1	0	0	22.01	133	200	17.12	2.9	68.9655	1.87	4.84	2.8	1.21
0406	0	1	65	19.8	1	0	90	56	0	1	0	0	0	0	0	1	0	1	51.2659	56.7586	1	0	1	0	0	1	0	1	1	0	1	75	1	0	3	1	1	0	1	10.31	114	210	9.14	0.67	313.433	0.63	3.01	1.61	1.2
0407	0	1	62	24.9	1	0	136	79	0	0	0	1	0	0	0	0	0	0	62.4321	85.9573	1	0	1	0	1	1	1	1	0	1	1	85	0	1	3	0	1	0	1	10.94	145	198	8.1	2.12	93.3962	0.79	5.16	3.25	1.3
0408	0	1	64	22	1	0	100	70	1	0	0	0	0	0	0	0	0	0	61.0012	86.2731	1	1	0	0	0	1	0	1	0	0	1	85	1	0	1	0	0	0	1	4.79	126	210	3.21	1.28	164.062	0.62	5.28	3.95	1.29
0409	0	1	70	22.7	1	0	110	70	0	0	0	0	0	0	0	1	0	1	34.4675	35.9661	1	1	0	1	0	1	0	1	1	1	1	75	0	0	3	1	1	0	1	8.32	118	418	5.32	1.6	261.25	0.69	3.16	1.78	0.87
0410	0	1	51	30.9	1	0	110	70	0	0	0	1	0	0	0	0	0	0	116.153	122.791	1	1	0	1	0	0	0	1	0	0	1	100	1	0	3	1	1	0	1	12.1	125	277	9.67	1.86	148.925	1.59	5.18	3.22	1.19
0411	0	2	75	19.9	1	0	99	64	0	1	0	0	0	0	0	0	0	1	50.1454	45.3369	1	0	1	0	0	1	0	1	0	0	1	75	1	0	3	1	1	0	1	6.68	96	230	4.9	1.28	179.688	1.04	3.44	1.65	0.97
0412	0	1	65	23.2	1	0	152	80	1	1	0	1	0	0	0	0	1	0	83.5629	81.4996	1	1	0	1	0	1	1	1	1	1	1	95	1	0	2	1	1	0	1	10.13	140	173	7.72	1.87	92.5134	1.55	3.5	2.17	0.76
0413	0	1	61	17.6	1	0	148	74	1	0	0	0	0	0	0	0	1	0	72.4328	80.2332	1	1	0	1	0	1	0	1	1	1	1	90	1	0	2	1	1	0	1	6.99	118	298	4.76	1.67	178.443	0.76	3.79	1.54	1.52
0414	0	1	51	26.2	1	0	140	91	0	0	0	1	0	0	0	1	0	1	39.0842	38.3397	1	0	1	1	0	1	1	1	0	1	1	100	0	0	2	0	1	0	1	11.7	151	182	10.11	0.97	187.629	1.31	4.51	2.86	1.05
0415	0	2	63	23	1	0	102	76	0	1	0	1	0	0	0	1	0	1	53.3415	57.4447	1	1	0	1	0	1	0	1	0	1	1	75	1	0	3	1	1	0	1	12.5	117	304	11.56	0.5	608	0.69	4.35	2.7	0.98
0416	0	1	47	26.8	1	0	112	74	0	0	0	1	0	0	0	1	0	0	113.101	128.071	1	1	0	1	0	1	0	1	1	0	0	100	1	0	3	1	1	0	1	7.83	133	385	5	2.27	169.604	1.11	3.64	1.87	1
0417	0	1	76	23.1	1	0	128	71	0	1	0	0	1	0	0	0	0	1	56.7017	74.2126	1	1	0	1	0	1	0	1	0	1	0	75	1	0	3	0	1	0	1	6.96	134	143	5.09	1.27	112.598	0.72	2.72	1.22	1.11
0418	0	2	81	19.4	1	0	108	72	0	1	0	0	0	0	0	0	0	1	46.2323	56.4034	1	0	1	0	0	1	0	1	1	0	1	75	1	0	1	0	0	0	1	7.82	105	239	6.27	1.25	191.2	0.73	3.72	2	1.3
0419	0	1	61	25.6	1	0	160	102	1	0	0	1	0	0	0	1	0	0	66.4521	92.8625	1	1	0	1	0	1	1	1	0	0	0	90	1	0	2	1	1	0	0	8.04	138	210	5.01	2.12	99.0566	1.89	3.76	2.19	1.13
0420	0	1	75	25.6	1	0	160	100	1	1	0	1	0	0	0	1	0	1	49.4431	61.1858	1	1	0	1	0	1	1	1	0	0	1	75	0	0	2	1	1	0	1	6.32	146	254	4.47	1.21	209.917	1.22	4.97	3.04	1.03
0421	0	1	62	27	0	1	126	78	0	0	0	1	1	0	0	1	0	0	85.4702	104.605	1	1	0	1	0	1	0	1	1	1	0	95	1	0	3	1	1	0	1	5.3	128	140	3.55	1.05	133.333	0.59	4.7	2.99	0.99
0422	0	1	75	26.6	1	0	120	70	0	0	0	1	0	0	0	0	0	0	61.4398	73.576	1	1	0	1	0	1	0	1	0	1	1	75	1	0	3	1	1	0	1	3.79	129	146	2.37	1.09	133.945	0.78	3.4	1.77	1.05
0423	0	1	73	22.3	1	0	139	73	0	0	0	1	1	0	0	0	1	1	51.7308	70.2061	1	1	0	1	0	1	0	1	1	0	1	75	1	0	3	1	1	0	1	12.01	117	304	10.57	0.77	394.805	0.55	3.47	1.51	1.48
0424	0	1	73	28.7	1	0	122	82	0	0	0	1	0	0	0	0	0	0	81.9071	84.0625	1	0	1	0	0	1	0	1	1	0	1	95	1	1	3	1	1	0	1	11.22	144	164	10.12	0.76	215.789	3.21	4.86	2.68	0.86
0426	0	1	41	22.5	1	0	90	60	1	0	0	0	0	0	0	1	0	0	96.2009	94.9831	1	1	0	0	0	1	0	1	1	0	1	95	1	0	3	0	1	0	1	7.28	123	301	5.09	1.86	161.828	1.48	6.82	4.07	1.44
0428	0	1	82	25.6	1	0	130	78	0	1	0	0	0	0	0	1	0	1	41.5457	54.8232	1	1	0	1	0	1	0	1	1	1	1	75	1	0	2	0	1	0	1	15.89	162	322	13.36	1.45	222.069	1.39	4	2.46	0.86
0429	0	1	51	28	1	0	152	82	0	0	0	1	0	0	0	1	0	0	151.216	143.899	1	1	0	1	0	1	0	1	1	0	1	100	1	0	4	1	1	1	1	9.85	138	207	7.4	1.59	130.189	1.78	4.27	2.35	0.96
0431	0	2	67	24.1	1	0	130	80	1	1	0	1	0	0	0	0	0	0	62.8519	77.1865	1	1	0	1	0	1	1	1	0	0	0	85	1	0	3	0	1	0	1	5.7	132	139	3.04	2.28	60.9649	0.78	4.5	2.6	1.51
0432	0	2	78	22.2	1	0	120	80	1	0	0	1	0	0	0	0	0	1	54.5978	63.1622	1	1	0	1	0	1	0	1	0	0	0	75	1	0	3	1	1	0	1	9.02	118	185	7.15	1.29	143.411	0.86	2.67	0.84	1.31
0433	0	1	35	32.7	1	0	120	80	0	0	0	1	0	0	0	1	0	0	131.036	1.33356	1	1	0	1	0	1	0	1	0	0	1	100	1	0	3	0	1	0	1	9.28	126	217	5.63	2.72	79.7794	2.55	9.96	6.55	1.06
0434	0	1	66	22.3	1	0	90	42	0	0	0	0	0	0	0	0	1	1	57.8021	78.4457	1	0	1	0	0	1	0	1	1	1	1	75	1	0	3	1	1	0	1	16.91	161	214	13.57	1.49	143.624	0.88	7.07	5.68	1.03
0435	0	1	74	21.1	1	0	134	74	0	1	1	0	0	0	0	0	0	0	60.5134	76.438	1	1	0	1	0	1	0	1	0	1	1	90	1	0	4	1	1	1	1	7.92	140	195	6.54	0.99	196.97	0.95	3.38	1.62	1.47
0436	0	1	62	25.7	0	1	145	85	0	0	0	1	0	0	0	0	1	0	80.4195	84.4913	1	1	0	1	0	1	0	1	0	1	1	95	1	0	3	1	1	0	1	6.94	135	169	4.57	1.64	103.049	1.43	3.26	1.75	0.78
0437	0	1	53	20.2	1	0	130	75	0	0	0	0	0	0	0	1	0	0	74.046	76.9689	1	1	0	1	0	1	0	1	0	0	0	90	1	0	2	0	1	0	1	9.35	132	154	7.11	1.75	88	1.09	4.04	1.89	1.13
0438	0	1	75	29.7	1	0	150	94	1	1	0	1	0	0	0	1	0	0	66.6456	68.1104	1	1	0	0	0	1	1	1	0	1	1	100	1	0	3	1	1	0	1	6.59	126	143	3.83	2.18	65.5963	2.02	4.57	2.86	0.79
0439	0	1	55	19.5	1	0	122	66	0	0	0	0	0	0	0	1	0	0	75.1995	82.8284	1	1	0	0	0	1	0	1	0	0	0	95	1	0	2	1	1	0	1	8.83	110	332	6.56	1.67	198.802	0.77	3.13	1.51	1.25
0440	0	2	61	21.9	1	0	90	60	0	1	0	1	0	0	0	0	0	1	53.1483	71.4753	1	0	1	1	0	1	0	1	0	1	1	75	1	0	3	1	1	0	1	5.25	112	215	2.74	1.43	150.35	2.1	3.21	1.63	0.95
0441	0	1	71	23.4	0	1	132	58	1	1	0	1	1	0	0	0	0	1	41.8186	41.4672	1	0	1	0	1	1	1	1	1	1	0	75	0	0	4	1	1	1	1	5.75	134	192	3.67	1.25	153.6	2.09	3.33	1.87	1
0442	0	1	61	24	0	1	110	76	1	1	0	1	0	0	1	0	0	0	70.8231	82.7803	1	0	1	1	0	1	0	1	0	0	1	90	1	0	2	0	1	0	1	7.97	145	158	6.62	0.9	175.556	1.69	3.19	1.53	1.15
0443	0	1	78	21.1	1	0	120	80	0	1	0	0	0	0	0	0	0	1	55.7045	77.0579	1	1	0	0	0	1	0	1	1	1	1	75	1	0	4	1	1	1	1	4.99	132	119	3.49	0.98	121.429	1.05	3.48	1.44	1.54
0444	0	2	58	28.7	0	1	120	80	0	1	0	0	0	0	0	0	0	0	75.3762	89.0809	1	1	0	1	0	1	0	1	1	0	1	95	1	0	2	0	1	0	1	4.53	133	196	2.66	1.67	117.365	1.46	5.4	3.45	1.19
0445	0	2	71	24.4	1	0	119	68	0	1	0	1	0	0	0	0	0	0	66.8836	66.8836	1	1	0	1	0	1	0	1	1	0	1	90	0	0	3	1	1	0	1	11.47	131	232	9.06	1.48	156.757	3.08	5.41	2.5	1.35
0446	0	1	70	24.4	1	0	140	85	1	1	0	1	0	0	0	0	0	1	57.6502	58.89	1	1	0	1	0	1	0	1	1	1	1	75	1	0	1	0	0	0	1	8.15	142	195	5.36	1.71	114.035	1.45	3.79	2.24	1.12
0447	0	1	62	23.8	1	0	140	80	0	1	0	1	0	0	1	1	0	0	63.919	64.6292	1	0	1	1	0	0	0	1	1	1	1	85	1	0	3	1	1	0	1	7.82	118	166	5.34	1.76	94.3182	2.45	2.29	0.98	0.59
0448	0	2	65	23.1	1	0	143	78	0	0	0	1	0	0	0	0	0	1	55.0122	60.336	1	1	0	1	0	1	1	1	1	1	1	75	0	0	2	1	1	0	1	7.38	123	210	5.07	1.72	122.093	1.7	3.65	1.93	1.23
0450	0	1	37	22.4	1	0	99	69	0	0	0	0	0	0	0	1	0	0	82.7101	94.7914	1	1	0	1	0	0	0	1	1	0	1	95	1	0	2	1	1	0	1	6.23	142	196	3.77	1.46	134.247	1.01	3.53	2.09	0.96
0451	0	1	68	23.4	1	0	128	66	1	1	0	0	0	0	0	1	0	1	54.4451	73.3496	1	0	1	1	0	0	0	1	1	0	1	75	1	0	2	1	1	0	1	9.82	133	154	7.22	1.68	91.6667	0.87	4.04	2.37	1.14
0452	0	1	68	25.4	1	0	168	96	1	1	0	1	0	0	0	0	0	0	75.1386	88.0196	1	1	0	1	0	1	1	1	1	0	0	95	1	0	4	1	1	1	1	7.06	134	179	5.16	1.31	136.641	0.62	4.62	2.63	1.48
0453	0	2	76	21.5	0	1	168	86	1	0	0	1	0	0	0	0	0	1	48.0873	46.6518	1	1	0	0	1	0	1	1	0	0	1	75	1	0	3	1	1	0	1	4.7	100	237	2.82	1.59	149.057	6.15	6.95	2.77	0.64
0454	0	1	63	25.6	1	0	150	78	0	1	0	1	0	0	0	0	0	0	73.4689	97.1685	1	0	1	1	0	0	0	1	1	0	1	90	1	0	3	1	1	0	1	3.61	139	107	1.45	1.66	64.4578	3.36	4.21	2.11	1.4
0455	0	1	46	20.9	1	0	105	58	0	0	0	0	0	0	0	1	0	0	120.566	131.331	1	1	0	1	0	1	0	1	1	0	1	100	1	0	1	1	0	0	1	9.26	118	208	8	0.81	256.79	NA	NA	NA	NA
0456	0	2	69	22	1	0	134	66	0	0	0	1	0	0	0	0	0	1	44.7	56.1	1	1	0	0	1	1	0	1	0	0	1	75	1	0	2	0	1	0	1	5.36	107	262	3.4	1.68	155.952	4.95	4.49	1.77	0.98
0457	0	2	51	25.6	1	0	110	70	0	0	0	1	1	0	1	0	0	0	86.7016	97.3491	1	1	0	0	1	1	0	1	1	0	0	95	1	0	3	0	1	0	1	5.51	105	214	3	1.73	123.699	NA	NA	NA	NA
0458	0	1	50	27.6	0	1	126	100	0	1	0	0	1	0	0	1	0	0	80.2047	92.2786	1	1	0	1	0	1	0	1	1	0	0	95	1	0	2	1	1	0	1	5.47	149	194	2.69	2.23	86.9955	1.31	5.88	4.3	0.97
0459	0	1	65	22.5	1	0	138	76	1	0	0	0	0	0	0	1	0	0	66.921	78.6774	1	1	0	1	0	0	0	1	1	0	1	90	1	0	3	1	1	0	1	11.43	144	158	9.16	1.52	103.947	1.28	4.27	2.65	0.97
0460	0	1	70	25.9	1	0	126	70	0	0	0	1	0	0	0	1	0	0	66.2968	92.8155	1	0	1	1	0	1	0	1	1	0	0	90	0	0	2	1	1	0	1	8.65	124	379	5.1	2.26	167.699	2.04	2.63	1.11	0.81
0461	0	1	61	22.8	1	0	130	84	1	1	0	1	0	0	0	0	0	0	86.1363	98.0628	1	1	0	1	0	1	0	1	1	1	1	95	1	0	1	0	0	0	1	9.56	128	336	6.89	1.83	183.607	1.54	3.86	2.17	0.81
0462	0	2	45	28.9	1	0	129	75	0	1	0	1	0	0	0	0	0	0	120.877	103.912	1	1	0	1	0	0	0	1	0	0	1	100	1	0	2	0	1	0	1	9.57	148	213	6.77	2.08	102.404	3.98	4.16	1.97	0.82
0463	0	1	57	24.2	1	0	140	94	1	0	0	1	0	0	0	1	0	0	63.7793	78.7861	1	1	0	1	0	1	1	1	1	1	1	85	1	0	2	1	1	0	1	9	143	248	5.52	2.4	103.333	0.97	4.76	2.94	1.19
0464	0	1	44	23.5	1	0	125	78	1	1	0	0	1	0	0	0	1	0	76.3454	86.343	1	0	1	1	0	1	0	1	1	0	1	95	1	0	3	0	1	0	1	7.65	137	240	4.99	2.08	115.385	1.81	3.29	1.64	1.05
0465	0	1	55	25.5	1	0	138	80	0	0	0	0	0	0	0	0	1	0	77.6768	74.0128	1	0	1	1	0	1	0	1	1	0	1	95	1	0	2	1	1	0	1	7.21	148	209	3.88	2.7	77.4074	1.76	5.89	4.37	0.81
0466	0	1	59	24.5	1	0	128	75	0	0	0	1	0	0	0	1	0	0	73.7398	78.7675	1	1	0	1	0	1	0	1	1	0	1	100	1	0	3	1	1	0	1	13.63	146	281	11.45	1.4	200.714	1.97	4.64	3.16	1.01
0468	0	1	78	23.7	1	0	130	64	1	0	0	0	0	0	0	1	0	1	49.2274	62.0138	1	1	0	0	0	0	0	1	1	1	1	75	0	0	1	0	0	0	1	4.69	128	105	3.03	1.22	86.0656	5.09	4.12	1.6	0.81
0469	0	1	73	23.8	1	0	146	76	0	0	0	1	0	0	0	0	1	0	60.9309	55.5148	1	1	0	1	0	1	0	1	1	0	1	85	0	0	3	1	1	0	1	6.36	147	157	2.74	3.05	51.4754	NA	NA	NA	NA
0470	0	1	61	23.4	1	0	129	72	0	1	0	1	0	0	0	0	0	0	64.3847	73.3496	1	0	1	1	0	1	1	1	1	0	1	85	1	0	3	0	1	0	1	10.77	140	166	92.7	0.55	301.818	1.86	2.96	1.59	0.67
0471	0	1	46	27.1	1	0	120	80	0	0	0	0	0	0	0	1	0	0	92.715	99.4991	1	1	0	1	0	1	0	1	0	0	1	95	1	0	1	0	0	0	1	13.64	157	245	10.23	2.41	101.66	1.2	6.87	4.24	1.42
0472	0	1	59	24.4	1	0	136	76	1	0	0	1	0	0	0	1	0	0	61.5542	72.6864	1	1	0	1	0	1	0	1	1	0	1	85	1	0	3	1	1	0	1	5.99	149	171	4.21	1.45	117.931	4.42	5.16	2.57	0.8
0473	0	1	48	18	1	0	128	89	0	0	0	1	0	0	0	0	0	0	83.5921	89.6496	1	0	1	1	0	1	0	1	1	0	1	95	1	0	2	1	1	0	1	10.35	139	227	9.16	0.8	283.75	0.64	3.99	2.48	1.05
0474	0	1	87	21.3	1	0	146	72	1	0	0	1	0	0	1	0	1	1	40.3899	38.8753	1	1	0	1	0	1	1	1	0	1	1	75	0	0	3	1	1	0	1	6.52	115	188	4.13	1.52	123.684	0.71	3.35	1.5	1.3
0475	0	1	53	22.1	1	0	140	89	1	1	0	1	1	0	0	0	1	1	58.0572	68.0456	1	1	0	0	1	1	0	1	0	1	0	75	1	0	3	0	1	0	1	7.23	152	226	5.81	0.92	245.652	1.14	2.52	1.04	1.06
0476	0	1	64	23.1	1	0	120	80	0	0	0	1	0	0	0	1	0	0	67.1013	78.1533	1	1	0	1	0	1	1	1	0	0	1	90	1	0	1	1	0	0	1	6.67	123	324	4.72	1.23	263.415	0.83	2.66	1.55	0.64
0478	0	1	69	17.6	1	0	171	91	1	0	0	1	0	0	0	0	1	1	39.2474	38.909	1	1	0	0	1	1	1	1	1	1	1	75	1	0	4	1	1	1	1	7.25	116	172	4.67	1.78	96.6292	3.39	4.49	2.8	0.74
0479	0	2	63	23.3	1	0	132	90	0	1	0	1	0	0	0	0	0	1	45.6592	50.0076	1	1	0	0	0	1	0	1	0	1	0	75	1	0	2	0	1	0	1	9.09	148	238	6.66	1.93	123.316	1.18	4.25	2.41	1.17
0481	0	1	64	18.4	1	0	86	56	1	0	0	0	0	0	0	1	0	1	49.1874	44.0098	1	0	1	1	0	1	0	1	1	0	1	75	1	0	2	1	1	0	0	7.28	118	230	6.6	0.45	511.111	0.38	3.21	1.74	0.92
0482	0	2	69	18.8	0	1	105	54	1	1	0	1	1	0	1	0	0	1	35.0257	45.6256	1	0	1	0	0	1	1	1	0	1	0	75	1	0	3	1	1	0	1	4.87	113	185	2.78	1.61	114.907	2.23	4.65	2.5	1.07
0485	0	1	58	25.5	1	0	130	74	0	0	0	0	0	0	0	0	1	0	98.1267	91.671	1	0	1	1	0	1	0	1	0	1	1	95	1	0	3	1	1	0	1	6.02	124	205	3.53	2.08	98.5577	14	5.26	0.84	0.43
0486	0	2	66	22.1	1	0	130	80	0	0	0	1	0	0	0	0	0	0	71.4987	60.8273	1	0	1	1	0	1	0	1	0	0	1	90	1	0	2	1	1	0	1	10.13	119	286	6.12	3.17	90.2208	0.86	3.75	1.91	1.23
0487	0	1	68	25.4	0	1	126	76	1	0	0	1	0	0	0	0	0	0	73.3496	73.3496	1	1	0	1	0	1	1	1	0	1	0	90	1	0	4	0	1	0	0	4.24	130	244	2.92	1	244	2.38	4.51	2.3	1.14
0489	0	1	64	26.2	1	0	155	95	1	0	0	1	0	0	0	0	1	0	68.0723	77.2506	1	1	0	1	0	1	1	1	0	1	0	90	1	0	2	0	1	0	1	6.1	143	218	3.95	1.66	131.325	2.33	4.71	2.53	1.15
0490	0	1	47	22.2	1	0	160	100	0	0	0	1	0	0	1	0	0	0	62.4191	63.0371	1	0	1	1	0	1	1	1	0	0	1	90	1	0	3	1	1	0	1	6.54	133	298	4.34	1.59	187.421	0.57	4.15	2.54	1.06
0491	0	1	82	22.4	1	0	160	70	0	0	0	1	1	0	0	0	1	1	32.5464	37.8158	1	1	0	0	0	1	1	1	0	1	0	70	1	0	2	1	1	0	1	7.3	124	199	5.06	1.35	147.407	4.21	4.14	2.27	0.79
0492	0	1	72	22.1	1	0	140	70	1	0	0	1	0	0	0	0	1	1	44.7316	41.5648	1	1	0	0	1	1	0	1	1	0	1	75	0	0	2	1	1	0	1	7.83	99	440	5.38	1.66	265.06	1.01	2.56	1.53	0.82
0493	0	1	69	22.6	1	0	168	80	1	1	0	1	1	0	0	0	0	0	73.1236	72.1354	1	0	1	0	0	0	1	1	0	0	1	90	0	0	3	0	1	0	1	7.75	133	276	5.5	1.57	175.796	0.75	3.11	2	0.7
0494	0	1	49	25.4	1	0	116	86	0	0	0	0	0	0	0	1	0	0	89.509	94.9669	1	1	0	1	0	1	0	1	0	0	1	95	1	0	2	0	1	0	1	27.26	162	254	26.3	0.61	416.393	2.4	4.82	2.15	1.5
0495	0	1	55	24.2	1	0	120	70	0	1	0	1	0	0	0	1	0	0	113.654	129.89	1	1	0	1	0	1	0	1	1	0	1	100	1	0	1	0	0	0	0	12.49	158	195	9.11	2.41	80.9129	0.86	3.78	2.36	0.75
0496	0	1	39	NA	1	0	122	65	0	0	0	0	0	0	0	1	0	0	NA	NA	1	1	0	1	0	1	0	1	1	0	1	100	1	0	2	0	1	0	1	9.62	131	166	6.29	2.69	61.71	1.76	3.79	2.8	0.79
0498	0	1	75	16.9	1	0	160	90	0	0	0	0	0	0	0	0	0	1	48.7368	53.7538	1	0	1	0	1	1	0	1	1	0	1	75	1	0	4	1	1	1	1	4.67	128	223	2.97	1.26	176.984	1.6	5.57	3.1	1.38
0499	0	1	69	21.3	1	0	132	80	0	0	0	0	0	0	0	1	0	1	40.9287	56.5644	1	1	0	1	0	0	0	1	1	0	1	75	1	0	2	1	1	0	1	8.17	135	133	6.62	1.19	111.765	0.96	4.12	2.18	1.23
0500	0	1	66	22.1	0	1	110	70	0	0	0	1	0	0	0	0	0	1	59.9181	66.8651	1	0	1	1	0	1	1	1	0	0	1	75	1	0	1	0	0	0	1	6.53	123	188	3.63	2.26	83.1858	0.86	3.84	2.06	1.04
0501	0	1	56	20.6	1	0	130	85	1	1	0	1	0	0	0	0	0	0	76.3753	83.699	1	1	0	1	0	1	1	1	1	0	1	95	1	0	1	1	0	0	1	5.9	155	165	3.87	1.56	105.769	2.6	5.4	3.15	1.01
0502	0	2	74	17.7	1	0	132	80	1	0	0	1	0	0	1	0	0	1	46.3744	47.8949	1	1	0	1	0	1	1	1	1	0	1	75	0	0	3	1	1	0	1	5.13	121	199	3.69	1.1	180.909	1.6	4.68	2.69	1.14
0503	0	1	66	NA	1	0	82	57	0	1	0	0	0	0	0	1	0	0	NA	NA	1	1	0	0	0	0	0	1	1	0	1	90	0	1	4	1	1	1	1	8.81	121	109	6.22	1.52	71.7105	0.6	2.77	1	1.2
0504	0	1	68	23.1	1	0	88	52	1	1	0	0	0	0	0	0	0	0	64.9668	75.7946	1	1	0	0	0	1	0	1	0	0	1	90	1	0	3	1	1	0	1	15.7	149	172	13.93	0.74	232.432	1.56	4.26	2.7	0.81
0505	0	1	66	28.2	1	0	149	87	0	1	0	1	0	0	0	0	0	0	82.742	78.8935	1	0	1	1	0	1	0	1	1	0	1	95	1	0	2	0	1	0	1	7.84	163	198	6.69	0.91	217.582	3.11	5.33	1.1	0.92
0506	0	1	52	24.8	1	0	120	80	0	0	0	0	0	0	0	1	0	0	109.852	108.327	1	0	1	1	0	1	0	1	0	0	1	100	1	0	2	1	1	0	1	9.95	137	250	6.79	2.18	114.679	1.04	2.91	1.6	0.84
0508	0	2	77	27.1	1	0	108	77	1	1	0	1	0	0	0	1	0	1	48.9103	50.0611	1	1	0	1	0	1	0	1	1	0	1	75	1	0	3	1	1	0	1	9.52	115	226	7.92	1.14	198.246	2.02	3.58	1.54	1.17
0509	0	1	51	25.1	1	0	170	100	1	0	0	1	0	0	0	0	0	0	129.087	122.841	1	1	0	0	1	1	1	1	0	1	0	100	1	0	3	1	1	0	1	5.36	143	183	3.76	1.1	166.364	0.56	4.3	2.6	1.22
0510	0	1	49	26.1	1	0	150	96	1	1	0	1	0	0	0	0	1	0	114.063	114.063	1	0	1	1	0	1	0	1	0	0	1	100	1	0	3	1	1	0	1	8.23	128	163	5.97	1.49	109.396	4.72	4.44	1.87	0.95
0511	0	1	67	21.1	0	1	120	80	1	1	0	1	0	0	1	0	1	1	51.2667	58.7692	1	1	0	1	0	1	1	1	1	0	0	75	1	0	1	1	0	0	1	3.76	124	127	2.78	0.63	201.587	1.25	4.82	2.94	0.99
0512	0	2	57	26.7	1	0	132	82	1	1	0	1	0	0	1	0	0	0	68.9976	76.1002	1	1	0	1	0	1	0	1	1	1	1	90	1	0	3	1	1	0	1	8.71	124	226	5.79	2.36	95.7627	NA	NA	NA	NA
0513	0	1	71	22.5	1	0	120	80	1	0	0	1	0	0	1	0	0	1	58.8611	51.0129	1	1	0	1	0	1	0	1	0	0	1	75	0	0	2	0	1	0	1	6.24	115	337	4.31	1.31	257.252	1.13	3.19	1.45	0.76
0514	0	1	67	27.7	1	0	118	78	1	0	0	1	0	0	0	1	0	1	56.6616	57.5755	1	0	1	1	0	0	1	1	1	0	1	75	1	0	3	0	1	0	1	5.21	103	135	3.54	1.25	108	2.36	3.36	1.8	0.68
0515	0	1	67	30.8	1	0	155	56	0	1	0	1	0	0	0	1	0	0	92.3551	113.465	1	1	0	1	0	1	1	1	1	0	1	95	1	0	2	0	1	0	1	9.12	152	230	7.72	1.11	207.207	1.1	3.57	2.22	0.8
0516	0	2	62	27.9	1	0	134	84	1	0	0	0	0	0	0	0	0	0	102.065	110.23	1	1	0	0	0	0	0	1	0	0	1	100	1	0	1	0	0	0	1	7.32	132	226	3.95	2.72	83.0882	2.36	6.22	3.95	0.99
0517	0	1	58	22.7	1	0	118	75	1	0	0	0	1	0	0	0	0	0	72.7384	71.862	1	1	0	1	0	1	0	1	1	0	1	90	1	0	3	1	1	0	1	4.42	137	139	2.5	1.52	91.4474	1.42	3.85	0.57	1.08
0518	1	2	73	19.6	1	0	127	58	0	1	1	0	0	0	0	0	0	0	79.3356	22.0092	1	0	1	1	0	1	0	1	0	1	1	100	1	0	4	1	1	1	1	6.86	114	162	4.57	1.73	93.6416	1.3	3.72	2.07	0.79
0519	0	1	56	27.7	1	0	151	84	0	1	0	1	0	0	0	1	0	0	94.7903	101.631	1	1	0	0	0	0	0	1	1	0	1	95	1	0	3	1	1	0	1	7.41	143	167	4.73	1.84	90.7609	NA	NA	NA	NA
0520	0	2	69	23.8	1	0	124	63	1	1	0	1	0	0	0	0	0	1	46.8609	52.6462	1	1	0	1	0	0	0	1	1	0	1	75	1	0	1	1	0	0	1	5.44	97	88	4.16	0.95	92.6316	2.15	3.74	1.73	1.34
0522	0	2	64	19.4	1	0	114	71	1	0	0	0	0	0	0	0	0	0	67.0553	59.4846	1	0	1	1	0	0	0	1	1	0	1	90	1	0	1	0	0	0	1	9.55	116	212	8.5	0.73	290.411	1.21	3.46	1.9	1.06
0523	0	1	58	18.4	1	0	186	58	0	1	1	0	0	0	0	1	0	0	70.3208	73.6171	1	0	1	0	0	0	0	1	1	0	1	90	1	0	4	1	1	1	1	13.61	120	302	10.89	1.8	167.778	1.34	2.77	1.51	0.75
0524	0	1	64	22.7	1	0	109	61	1	1	0	0	0	0	0	1	0	0	88.7494	100.783	1	0	1	0	0	1	0	1	1	1	1	95	1	0	2	1	1	0	1	11.11	149	189	6.04	4.34	43.5484	3.27	4.54	2.25	0.84
0525	0	1	61	29.8	1	0	120	72	1	1	0	1	0	0	0	1	0	0	122.916	108.166	1	1	0	0	1	1	0	1	0	1	1	100	1	0	3	1	1	0	1	5.27	125	185	2.87	1.58	117.089	3.75	4.76	2.42	0.82
0526	0	1	57	25.3	0	1	110	80	0	1	0	0	0	0	0	0	1	0	97.4617	93.7606	1	1	0	1	0	1	0	1	0	1	1	95	1	0	2	0	1	0	1	8.25	145	223	5.43	2.06	108.252	0.62	2.67	1.61	0.59
0527	0	2	72	22.3	1	0	140	80	1	1	0	1	0	0	1	0	0	1	37.0619	32.8723	1	1	0	1	0	1	0	1	0	1	1	75	1	0	3	1	1	0	1	5.21	119	174	3.44	1.37	127.007	11.52	5.66	0.94	0.71
0528	0	2	69	27.7	0	1	170	80	1	1	0	1	0	0	0	0	0	0	65.4161	72.1501	1	1	0	1	0	1	1	1	0	0	1	90	1	0	2	1	1	0	1	7.47	123	294	5.41	16.4	17.9268	1.7	4.47	2.69	0.91
0529	0	1	75	25.2	0	1	120	74	0	1	0	0	1	0	0	0	1	0	75.2241	90.9969	1	0	1	1	0	1	0	1	0	1	0	95	1	0	3	1	1	0	1	5.7	140	190	27.1	3.7	51.3514	2.26	4.66	2.52	1.16
0531	0	1	77	26.7	1	0	188	60	1	0	0	1	0	0	0	1	0	1	52.8549	50.385	1	0	1	0	0	1	1	1	1	1	1	75	1	0	4	1	1	1	1	9.89	133	293	7.9	1.17	250.427	2.05	2.96	1.39	0.86
0532	0	2	80	14.8	1	0	111	73	0	1	0	0	0	0	0	0	0	1	34.0076	28.7756	1	1	0	1	0	0	0	1	0	0	1	70	1	0	3	1	1	0	1	5	106	124	3.71	0.93	133.333	0.76	3.25	1.66	1.15
0533	0	2	67	20.5	1	0	97	53	0	0	0	0	0	0	0	1	0	1	49.4711	56.8918	1	1	0	0	0	1	0	1	0	1	1	75	0	0	1	1	0	0	1	6.65	134	79	4.02	1.88	42.0213	3.58	7.58	4.23	1.15
0534	0	1	60	24.9	1	0	128	80	1	1	0	1	0	0	0	0	1	0	87.7973	97.7995	1	1	0	1	0	0	0	1	1	0	1	95	1	0	3	0	1	0	1	4.89	152	186	2.86	1.62	114.815	1.7	3.59	2.26	0.7
0535	0	1	80	16.8	1	0	130	70	0	0	0	1	0	0	0	1	0	1	41.8524	48.7323	1	1	0	1	0	1	0	1	0	1	0	75	0	0	3	0	1	0	1	7.9	149	259	5.34	1.73	149.711	0.67	3.52	1.71	1.24
0536	0	2	72	25.8	1	0	112	64	0	1	0	1	0	0	0	0	0	1	38.7693	34.4955	1	1	0	1	0	0	0	1	1	1	1	75	0	0	3	1	1	0	1	10.92	122	192	9.62	0.79	243.038	NA	NA	NA	NA
0537	0	2	56	20.8	0	1	180	100	0	1	0	1	0	0	0	0	0	0	67.0013	75.5094	1	1	0	1	0	1	1	1	0	0	0	90	1	0	3	1	1	0	1	6.76	116	310	68.5	25.4	12.2047	0.93	3.24	2.08	0.75
0538	0	1	66	27.4	1	0	142	84	1	1	0	1	0	0	0	0	1	0	79.4323	68.5626	1	1	0	1	0	1	1	1	0	0	1	95	1	0	3	1	1	0	1	14.5	130	249	11.7	1.58	157.595	0.94	4.32	2.86	0.93
0540	0	1	57	18.5	0	1	125	85	1	0	0	1	0	0	0	1	0	0	60.8802	68.9976	1	1	0	0	1	1	1	1	0	0	0	85	0	0	2	0	1	0	1	8.37	156	336	5.72	1.78	188.764	0.79	4.05	2	1.37
0541	0	1	59	27.7	1	0	138	82	1	1	0	1	0	0	0	1	0	0	102.931	120.35	1	1	0	1	0	1	1	1	0	0	0	95	1	0	3	1	1	0	1	8.18	152	243	5.41	2.3	105.652	1.93	6.1	3.79	1
0542	0	1	66	16.2	1	0	140	78	0	0	0	1	0	0	0	0	1	1	58.3642	59.321	1	0	1	0	0	1	1	1	0	0	0	75	1	0	1	1	0	0	1	2.7	120	111	2.09	0.45	246.667	0.62	2.78	1.05	1.46
0543	0	1	52	29	1	0	153	89	0	1	0	1	0	0	0	1	0	0	93.2355	89.2681	1	1	0	0	1	0	0	1	0	0	1	95	1	0	2	0	1	0	0	7.24	141	162	4.92	1.74	93.1034	4.04	4.57	1.77	1.46
0544	0	1	36	24.6	1	0	146	92	0	0	0	1	0	0	0	0	0	0	86.1267	89.9975	1	1	0	0	1	1	1	1	0	0	1	95	1	0	1	1	0	1	0	5.42	116	192	3.79	1.17	164.103	2.46	3.66	1.94	0.91
0545	0	1	78	21.8	1	0	111	56	0	0	0	0	0	0	0	1	0	1	40.988	38.3796	1	0	1	1	0	1	0	1	0	1	1	75	0	0	3	1	1	0	1	5.19	69	212	3.11	1.56	135.897	1.03	2.3	1.28	0.59
0546	0	2	76	19.4	1	0	140	81	1	1	0	1	0	0	1	1	0	1	56.5281	61.667	1	0	1	1	0	1	1	1	1	0	1	75	0	0	2	1	1	0	0	3.25	115	108	2.51	0.54	200	2.83	4.43	2.34	0.81
0547	0	1	58	26.6	1	0	122	70	1	1	0	1	0	0	0	1	0	0	113.217	118.443	1	1	0	1	0	1	1	1	1	0	0	100	1	0	3	1	1	0	1	6.64	124	201	3.14	2.8	71.7857	2.04	3.96	2.56	0.93
0548	0	1	39	22.9	1	0	100	70	0	0	0	0	0	0	0	1	0	0	118.398	104.133	1	1	0	1	0	1	0	1	1	0	1	100	1	0	1	1	0	0	1	12.75	149	230	9.78	2.07	111.111	0.8	5.97	NA	1.03
0549	0	2	48	31.1	1	0	118	73	0	0	0	1	0	0	0	0	0	0	67.5953	66.2567	1	1	0	1	0	1	0	1	1	1	1	90	1	0	3	1	1	0	1	12.18	131	301	11.08	0.8	376.25	2.01	6.17	3.85	1.03
0550	0	1	63	19.4	1	0	152	91	0	0	0	0	0	0	0	1	0	0	78.7139	74.8427	1	1	0	0	0	1	0	1	1	0	1	95	1	0	3	1	1	0	1	7.05	142	119	5.61	1.07	111.215	1.11	3.93	2.3	1.07
0551	0	1	79	24.6	0	1	110	64	0	1	0	0	1	0	0	0	1	1	43.1013	58.7256	1	1	0	1	0	1	0	1	0	1	0	75	1	0	2	1	1	0	0	10.15	145	263	6.4	2.79	94.2652	1.26	4.21	2.68	0.81
0552	0	1	75	22	1	0	148	106	0	0	0	0	0	0	1	0	0	1	58.143	49.1518	1	1	0	1	0	1	0	1	0	0	1	75	1	0	3	1	1	0	1	8.13	125	148	6.24	1.65	89.697	1.48	3.74	2.25	1.03
0553	0	1	75	29.1	1	0	119	82	1	0	0	1	0	0	1	1	0	0	68.671	57.9411	1	0	1	1	0	1	0	1	1	0	1	90	0	0	2	0	1	0	1	8.48	113	126	6.52	1.44	87.5	0.81	3.04	1.87	0.89
0554	0	2	75	17.7	1	0	142	72	1	1	0	0	0	0	0	0	0	1	38.8177	46.9047	1	1	0	1	0	1	0	1	0	0	1	75	0	0	3	1	1	0	1	6.61	99	196	4.57	1.49	131.544	0.99	3.5	1.52	1.39
0555	1	1	48	24.9	1	0	122	92	0	1	0	0	0	0	0	0	0	0	109.622	87.4762	1	1	0	1	0	1	0	1	0	0	1	100	1	0	3	1	1	0	1	13.23	164	169	9.95	2.18	77.5229	1.81	4.99	3.32	0.87
0556	0	1	58	21.8	1	0	115	72	1	1	0	0	0	0	0	1	0	0	72.6773	77.5224	1	1	0	1	0	1	0	1	0	0	1	100	0	0	3	1	1	0	1	7.43	161	237	4.14	2.45	96.7347	1.42	3.28	1.96	0.99
0557	0	1	67	23.2	0	1	90	61	0	0	0	0	1	0	0	0	0	1	51.1709	57.5013	1	1	0	1	0	0	0	1	0	0	0	75	1	0	3	1	1	0	1	7.73	135	132	5.21	1.98	66.6667	1.35	4.29	1.87	1.45
0558	0	1	63	24.2	1	0	126	86	1	0	0	1	0	0	1	1	0	0	85.5746	82.3655	1	1	0	1	0	1	0	1	1	0	1	95	1	0	3	1	1	0	1	9.84	132	245	7.42	1.85	132.432	0.94	3.53	1.98	0.97
0559	0	1	59	24.5	1	0	150	90	1	1	0	1	0	0	0	0	0	0	115.526	100.457	1	0	1	0	1	0	0	1	0	1	0	100	1	0	1	0	0	0	1	6.14	113	239	3.19	2.36	101.271	1.88	3.92	2.16	1.04
0560	0	1	61	24.8	0	1	170	115	0	1	1	1	0	0	0	0	1	0	71.7567	68.3397	1	1	0	0	1	1	1	0	1	1	0	90	1	0	3	1	1	0	1	7.37	133	165	4.99	1.79	92.1788	1.07	3.31	1.63	1.22
0561	0	2	72	24.2	1	0	183	72	1	1	0	1	0	0	0	0	0	1	44.4149	55.5187	1	1	0	1	0	0	1	1	1	1	1	75	1	0	2	1	1	0	0	10.23	107	223	6.7	2.34	95.2991	2.92	4.66	2.64	0.67
0562	0	1	48	20.9	1	0	120	80	1	0	0	1	0	0	0	1	0	0	74.5584	79.9482	1	1	0	1	0	1	0	1	1	0	1	90	1	0	1	1	0	0	0	3.97	152	139	2.79	0.69	201.449	1.33	2.73	1.23	0.91
0563	0	1	78	22.8	0	1	165	78	1	0	0	1	1	0	1	1	0	1	41.687	56.612	1	1	0	1	0	1	1	1	0	0	1	75	1	0	3	0	1	0	1	4.59	131	89	3.78	0.48	185.417	0.8	3.46	1.84	1.09
0564	0	1	81	25.3	1	0	113	62	0	0	0	1	0	0	0	1	0	1	56.5542	69.1218	1	1	0	1	0	0	1	1	0	1	1	75	1	0	3	1	1	0	1	6.71	116	226	4.2	1.85	122.162	1	5.27	3.32	1.12
0565	0	2	65	21.9	1	0	118	72	0	1	0	1	0	0	0	0	0	1	59.5966	59.5966	1	0	1	0	1	1	0	1	1	1	1	75	1	0	4	1	1	1	1	7.26	112	308	4.47	1.8	171.111	1.81	3.38	1.7	1.02
0567	0	2	73	31.6	0	1	199	105	1	1	0	1	0	0	0	0	0	0	68.6802	67.7645	1	1	0	0	1	1	1	1	0	0	1	90	1	0	2	0	1	0	0	7.52	137	273	5.15	1.89	144.444	2.14	6.81	4.2	1.23
0568	1	2	69	27.5	1	0	111	75	0	0	0	1	0	0	0	0	0	0	65.9079	45.7694	1	1	0	1	0	1	0	1	1	1	1	90	1	0	3	0	1	0	1	16.29	117	262	14.99	0.93	281.72	2.11	5.19	2.77	1.49
0569	0	2	53	22.2	1	0	170	100	0	0	0	1	0	0	0	0	0	0	114.658	92.176	1	1	0	1	0	1	1	1	0	0	0	100	1	0	1	0	0	0	1	7.26	141	215	4.82	2.09	102.871	10.2	8.92	2	1.17
0570	0	2	77	22.9	1	0	162	76	1	1	0	1	1	0	0	0	0	1	42.9658	54.971	1	1	0	1	0	1	1	1	0	1	1	75	0	0	3	0	1	0	1	6.68	135	149	3.97	1.78	83.7079	2.37	3.64	1.98	0.87
0571	0	1	59	17.4	1	0	154	74	0	0	0	1	0	0	0	0	1	0	64.5572	68.0946	1	1	0	0	1	0	1	1	1	1	0	90	1	0	1	1	0	0	1	4.49	149	209	2.93	1.13	184.956	0.62	4.24	2.15	1.37
0572	0	1	62	22.3	0	1	120	80	0	0	0	1	0	0	0	0	0	1	44.9191	43.1366	1	1	0	1	0	1	0	1	0	1	0	75	0	0	3	1	1	0	1	9.52	104	361	7.55	1.06	340.566	0.92	5.12	3.65	0.97
0573	0	2	75	22.8	1	0	116	65	0	0	0	0	0	0	0	0	0	1	49.9817	55.1268	1	1	0	1	0	1	0	1	0	0	1	75	1	0	2	1	1	0	1	5.43	120	229	2.77	2.06	111.165	2.03	3.77	2.03	1.02
0574	0	2	64	28.2	1	0	130	66	0	0	0	1	0	0	0	0	0	1	35.5659	34.8249	1	1	0	0	1	1	0	1	1	1	1	75	0	0	3	1	1	0	1	1.98	60	140	1.26	0.39	358.974	2.01	2.94	0.91	1.39
0575	0	2	62	24.4	1	0	110	70	1	0	0	0	0	0	0	0	0	0	87.4083	89.1565	1	1	0	0	0	1	0	1	1	1	1	95	1	0	3	1	1	0	1	8.35	130	263	4.84	2.86	91.958	2.13	6.05	3.63	1.06
0576	0	2	67	25.1	1	0	160	100	1	0	0	1	0	0	0	0	0	1	53.488	57.9454	1	1	0	0	0	0	1	1	0	0	1	75	1	0	1	0	0	0	1	5.23	108	197	3.46	1.45	135.862	1.27	5.68	3.18	1.36
0577	0	1	62	25.7	1	0	120	70	0	1	0	0	0	0	0	1	0	0	79.2706	79.2706	1	1	0	1	0	1	0	1	0	0	1	95	1	0	3	0	1	0	1	5.2	135	224	2.97	1.58	141.772	2.91	3.24	1.61	0.7
0578	0	1	68	31.2	1	0	158	80	1	1	0	1	0	0	1	0	0	0	81.4446	92.6014	1	1	0	1	0	1	1	1	0	1	1	95	1	0	2	0	1	0	1	5.37	123	143	3.74	1.25	114.4	0.84	3.9	2.18	1.14
0579	0	1	87	29.5	1	0	130	70	1	0	0	1	0	0	0	0	0	1	44.2218	53.5908	1	1	0	1	0	1	1	1	0	0	1	75	0	0	2	1	1	0	1	6.31	115	270	4.06	1.8	150	2.1	4.07	2.28	0.74
0580	0	2	74	23.8	0	1	130	60	0	0	0	1	0	0	0	0	0	1	52.2137	47.181	1	1	0	1	0	1	0	1	0	0	1	75	1	0	1	0	0	0	1	6.62	133	149	4.3	1.78	83.7079	1.18	4.74	3.02	0.97
0581	0	2	69	17.7	1	0	154	77	0	1	0	1	0	0	0	0	0	1	41.7425	42.8707	1	1	0	1	0	1	1	1	0	1	1	75	0	0	3	1	1	0	1	9.8	112	238	6.71	2.5	95.2	3.39	4.78	2.32	1.03
0582	0	2	58	28.5	1	0	102	68	1	0	0	1	0	0	0	0	0	0	86.652	91.2941	1	1	0	1	0	1	0	1	0	0	1	95	1	0	2	1	1	0	1	7.42	141	320	3.38	3.45	92.7536	1.08	4.16	2.56	0.93
0583	0	1	58	17.4	1	0	132	69	0	0	0	1	0	0	0	1	0	1	55.9319	63.1026	1	1	0	1	0	1	1	1	1	0	1	75	1	0	3	1	1	0	1	11.24	120	315	9.37	1.23	256.098	1.03	4.61	2.46	1.34
0584	0	1	70	26.3	0	1	136	80	0	0	0	0	0	0	0	0	1	0	64.8795	66.2312	1	1	0	1	0	1	0	1	0	1	1	90	1	0	2	0	1	0	1	6.86	139	205	4.23	2.01	101.99	3.92	4.75	2.34	0.83
0585	0	2	64	23.9	0	1	120	70	0	1	0	1	0	0	0	0	0	0	84.8171	78.5344	1	1	0	1	0	1	1	1	0	1	1	95	1	0	3	1	1	0	1	6.34	119	238	4.35	1.42	167.606	2.54	4.86	2.68	0.98
0586	0	2	66	19.1	1	0	141	85	1	0	0	1	0	0	0	0	0	0	64.4925	102.526	1	1	0	1	0	0	0	1	0	1	1	90	1	0	2	0	1	0	1	4.62	120	107	3.17	1.18	90.678	1.17	4.31	2.36	1.25
0587	0	1	56	22.7	1	0	98	52	0	1	0	1	0	0	0	1	0	0	76.4201	85.3523	1	1	0	1	0	0	0	1	0	0	1	95	1	0	1	0	0	0	0	12.22	138	148	10.28	1.2	123.333	1.56	4.18	2.53	0.81
0588	0	1	81	28.9	1	0	120	70	1	1	0	1	0	0	0	0	0	1	59.4454	55.7684	1	1	0	1	0	0	1	1	0	0	0	85	1	0	3	1	1	0	1	5.82	126	171	4.34	0.72	237.5	1.65	4.28	2.41	0.93
0589	0	2	64	20	1	0	182	90	0	1	0	1	0	0	0	0	0	1	59.8281	59.8281	1	0	1	1	0	1	1	1	0	1	1	75	1	0	3	1	1	0	1	7.22	109	339	4.43	2.2	154.091	1.4	5.34	3.1	1.32
0590	0	2	50	22.9	1	0	128	86	0	1	0	1	0	0	0	0	0	0	77.934	100.856	1	1	0	1	0	1	0	1	0	1	0	95	1	0	2	1	1	0	1	5.76	89	254	4.01	1.13	224.779	4.17	8.08	4.03	1.26
0591	0	2	65	26.8	1	0	100	80	0	0	0	1	0	0	0	0	0	0	67.1098	100.665	1	1	0	0	1	1	1	1	0	1	1	90	1	0	2	0	1	0	1	6.06	129	181	3.09	2.37	76.3713	1.65	6.43	4.26	1.33
0592	0	1	44	26.3	1	0	151	93	1	1	0	1	0	0	1	1	0	0	117.359	146.699	1	0	1	1	0	1	1	1	1	1	1	100	1	0	3	1	1	0	1	13.41	151	271	10.67	1.86	145.699	1.38	5.61	3.78	1.02
0593	0	1	53	25.6	1	0	146	94	0	1	0	1	0	0	0	1	0	0	121.083	114.064	1	0	1	1	0	1	0	1	1	0	1	100	1	0	3	0	1	0	1	8.78	154	147	5.62	2.26	65.0442	1.16	3.41	1.85	0.86
0594	1	2	72	25.4	1	0	120	76	0	1	0	1	0	0	0	0	0	0	82.0162	63.7904	1	0	1	1	0	1	0	1	1	0	1	95	1	0	1	0	0	0	1	13.94	114	267	11.63	1.62	164.815	0.51	4.38	2.17	1.61
0595	0	2	64	21.2	1	0	106	68	0	0	0	1	0	0	0	0	0	1	51.5958	75.8761	1	1	0	0	0	0	0	1	0	0	0	75	1	0	1	1	0	0	1	8.93	116	280	3.75	2.33	120.172	1.66	3.67	2.11	0.9
0596	0	1	50	23.4	1	0	128	80	0	1	0	1	0	0	0	1	0	0	69.4965	78.4317	1	1	0	1	0	1	0	1	1	0	1	90	1	0	2	1	1	0	1	8.35	151	336	5.61	2.05	163.902	1.27	4.56	2.69	0.94
0598	0	1	68	21.8	0	1	120	80	0	1	0	1	1	0	0	1	0	0	62.0538	66.1907	1	1	0	1	0	1	0	1	1	1	1	85	1	0	3	1	1	0	1	6.36	139	214	3.89	1.96	109.184	1.93	4.02	1.93	0.97
0599	0	2	79	16.4	1	0	120	80	1	0	0	0	0	0	0	0	0	1	44.1312	44.1312	1	1	0	1	0	1	0	1	0	0	1	75	1	0	2	0	1	0	1	4.89	133	200	2.83	1.42	140.845	0.92	3.76	1.85	1.24
0600	0	2	68	22.2	0	1	167	62	0	1	0	0	0	0	0	0	0	1	42.9503	52.1194	1	1	0	1	0	1	0	1	1	1	1	75	1	0	3	1	1	0	1	4.2	139	118	2.65	1.06	111.321	1.01	2.91	1.08	1.04
0601	0	1	69	24.8	1	0	142	78	0	1	0	1	0	0	0	1	0	0	68.2931	72.2636	1	1	0	1	0	1	1	1	0	0	1	90	1	0	2	0	1	0	0	5.3	129	207	3.79	1.02	202.941	1	2.78	1.47	0.98
0603	1	2	62	23.8	1	0	140	98	0	0	0	1	0	0	1	0	0	0	87.0551	66.211	1	1	0	1	0	1	0	1	0	0	1	95	1	0	2	1	1	0	1	15.24	134	275	13.97	0.74	371.622	NA	NA	NA	NA
0604	0	1	71	24.7	0	1	137	75	0	1	0	0	1	0	0	0	1	0	71.7527	66.6878	1	1	0	0	1	1	0	1	0	1	1	90	0	0	3	1	1	0	1	6.56	149	125	4.5	1.64	76.2195	1.99	2.95	1.38	0.81
0605	0	1	70	15.8	1	0	141	80	0	0	0	1	0	0	0	1	0	1	36.3044	41.3119	1	1	0	1	0	1	0	1	0	0	1	75	1	0	2	1	1	0	1	9.09	115	182	7.3	0.87	209.195	0.61	3.78	1.36	1.65
0606	0	1	66	20.7	1	0	164	89	0	0	0	1	0	0	0	1	0	0	110.568	95.6837	1	0	1	1	0	1	1	1	1	1	1	95	1	0	2	0	1	0	0	13.31	151	266	12.08	0.74	359.459	1.82	4.28	2.19	1.4
0607	0	1	69	24	1	0	152	78	1	1	0	1	1	0	0	0	1	0	75.3499	81.2366	1	1	0	1	0	1	0	1	0	0	1	95	1	0	2	1	1	0	1	7.73	126	333	5.2	1.84	180.978	2.19	6.6	3.9	1.02
0608	0	1	65	23.7	1	0	138	80	0	0	0	1	0	0	0	1	0	1	58.2537	62.012	1	1	0	1	0	0	0	1	0	0	1	90	1	0	3	1	1	0	1	5.44	151	198	3.9	1.23	160.976	2.02	6.19	3.84	1.09
0609	0	1	51	22.1	1	0	134	70	0	1	0	1	0	0	0	1	0	0	107.375	125.959	1	1	0	0	1	0	1	1	0	0	0	100	1	0	2	0	1	0	1	5.36	127	107	3.19	1.62	66.0494	0.43	3.69	2.12	0.94
0610	0	1	80	24.1	0	1	126	76	1	0	0	1	0	0	0	0	1	1	49.3839	47.9594	1	1	0	1	0	1	1	1	0	0	1	75	1	0	1	0	0	0	1	6.01	131	178	3.89	1.57	113.376	1.65	4.67	2.55	0.97
0611	0	1	78	19.4	1	0	120	80	1	0	0	0	0	0	0	0	0	1	39.8308	40.6607	1	0	1	1	0	1	0	1	0	0	0	75	1	0	3	1	1	0	1	7.65	142	158	5.22	1.69	93.4911	1.39	4.5	2.49	1.1
0612	0	2	81	24.8	1	0	130	78	1	1	0	1	0	0	0	0	0	1	30.8945	32.487	1	1	0	1	0	1	0	1	0	0	1	70	1	0	1	0	0	0	1	7.44	139	210	5.92	0.97	216.495	1.9	6.26	3.47	0.91
0613	0	1	74	27.3	1	0	136	72	1	1	0	1	1	0	0	0	0	1	37.2753	48.6571	1	1	0	1	0	1	1	1	0	0	0	75	1	0	3	0	1	0	1	6.22	116	124	4.25	1.48	83.7838	1.61	3.31	1.58	1.16
0614	0	2	71	20.8	1	0	120	80	0	0	0	0	0	0	0	0	0	0	60.1349	54.0342	1	1	0	0	0	0	0	1	0	0	0	85	1	0	2	1	1	0	1	3.18	114	127	1.46	1.38	92.029	0.54	4.6	2.42	1.42
0615	0	2	52	25.4	0	1	158	100	0	1	0	1	0	0	0	0	0	0	112.147	97.4388	1	1	0	1	0	0	0	1	0	1	0	100	1	0	2	0	1	0	1	7.13	126	243	3.65	2.67	91.0112	1.83	3.59	1.8	0.97
0616	1	1	70	NA	1	0	123	89	0	0	1	1	0	0	1	1	0	0	NA	NA	1	0	1	1	0	1	0	1	1	1	1	100	1	0	1	1	0	0	1	8.32	138	151	5.78	2.06	73.301	2.26	6.13	4.14	1.85
0617	0	1	50	28.2	1	0	115	70	0	1	0	0	0	0	0	0	0	0	130.635	149.598	1	1	0	1	0	1	0	1	0	0	1	95	1	0	1	0	0	0	1	5.67	118	241	3.44	1.61	149.689	0.93	2.5	1.05	0.68
0618	0	1	54	19.5	1	0	95	61	0	0	0	0	0	0	0	1	0	0	88.7406	88.7406	1	1	0	1	0	1	0	1	1	1	1	100	1	0	3	1	1	0	1	8.36	143	234	6.15	1.4	167.143	1.52	6.46	4.4	0.95
0619	0	1	34	22	1	0	122	89	0	1	0	1	0	0	0	1	0	0	122.815	130.613	1	0	1	1	0	1	1	1	0	1	1	95	1	0	3	1	1	0	1	13.73	157	251	10.82	2.29	109.607	1.57	4.24	2.47	0.93
0620	0	2	62	27.2	1	0	136	80	0	1	0	1	0	0	0	0	0	0	79.5316	71.6905	1	1	0	1	0	1	0	0	0	0	1	95	1	0	1	0	0	0	1	7.54	115	146	4.9	1.9	76.8421	5.3	5.21	2.19	0.96
0621	0	1	67	28.6	1	0	120	76	1	0	0	0	0	0	1	0	0	0	91.0269	91.0269	1	1	0	0	0	0	0	1	1	0	0	85	1	0	1	1	0	0	1	5.46	141	170	3.45	1.43	118.881	0.71	5.36	2.71	1.73
0623	0	1	78	27.3	0	1	154	85	0	1	0	1	1	0	0	0	0	1	49.0436	54.5438	1	0	1	0	1	1	1	1	1	1	1	75	1	0	3	1	1	0	1	7.7	114	175	4.98	2.02	86.6337	2.41	4.8	2.66	1.13
0624	0	1	48	21.4	1	0	110	60	0	0	0	0	0	0	0	0	0	0	81.6742	74.5721	1	0	1	0	0	1	0	1	1	0	1	95	1	0	3	1	1	0	1	5.77	142	266	3.38	2.01	132.338	1.11	3.48	2.09	0.93
0625	0	1	60	24.8	1	0	120	80	0	0	0	0	0	0	0	1	0	0	70.824	78.5974	1	1	0	1	0	1	0	1	0	1	1	90	1	0	1	1	0	0	1	7.15	153	205	4.11	2.5	82	3.56	4.95	2.59	0.86
0626	1	1	52	24.3	1	0	106	64	0	0	0	1	0	0	0	1	0	0	61.474	31.7448	1	0	1	0	0	0	0	1	1	1	1	85	1	1	4	0	1	1	1	20.31	138	241	17.68	1.71	140.936	0.23	3.77	2.06	1.1
0627	0	1	70	22.7	1	0	168	80	0	1	0	1	0	0	0	1	0	0	67.8178	66.9806	1	0	1	1	0	1	1	1	0	1	1	90	1	0	3	1	1	0	1	8.03	149	251	5.21	1.87	134.225	6.7	7.51	2.63	1
0628	0	1	53	19.8	0	1	132	92	0	0	0	0	0	0	0	1	0	0	86.8832	102.812	1	0	1	1	0	1	0	1	0	0	1	100	1	0	2	0	1	0	1	9.16	143	271	6.37	2.01	134.826	1.6	6.72	4.4	1.17
0629	0	1	60	23.7	1	0	105	71	0	0	0	1	1	0	0	0	1	0	109.477	103.309	1	0	1	1	0	0	0	1	1	0	1	100	1	0	3	1	1	0	1	5.92	121	160	4.21	1.15	139.13	NA	NA	NA	NA
0630	0	1	69	19.4	1	0	90	59	0	1	0	0	0	0	0	1	0	0	65.6843	78.3973	1	1	0	0	0	1	0	1	1	0	1	90	1	0	3	0	1	0	1	13.39	127	150	11.28	1.19	126.05	0.92	4.08	2.24	0.98
0631	0	1	77	22.1	1	0	120	80	0	0	0	1	0	0	0	0	0	1	43.2377	49.291	1	1	0	0	1	1	1	1	0	1	1	75	1	0	3	1	1	0	1	8.42	113	157	6.07	1.36	115.441	0.85	3.6	2.17	0.86
0632	0	1	58	21.3	1	0	110	70	0	0	0	0	0	0	0	1	0	1	59.3284	78.57	1	1	0	1	0	1	0	1	0	1	1	75	1	0	2	0	1	0	1	7.53	141	195	5.38	1.62	120.37	3.42	4.28	2.3	0.87
0633	0	1	61	24.7	1	0	130	80	0	0	0	0	0	0	0	1	0	0	71.9847	67.1396	1	0	1	1	0	1	0	1	0	1	0	90	1	0	3	1	1	0	1	11.98	146	273	7.92	2.84	96.1268	1.11	4.55	2.54	1.27
0634	0	1	47	25.7	1	0	124	80	1	1	0	1	0	0	0	0	0	0	101.902	103.175	1	1	0	0	0	1	1	1	0	0	1	100	1	0	1	0	0	0	1	4.12	145	180	2.57	1.23	146.341	6.9	4.14	0.98	0.68
0635	0	1	40	26	1	0	142	118	1	1	0	1	1	0	0	0	0	0	94.6722	125.259	1	1	0	0	1	1	1	1	1	0	0	95	1	0	3	1	1	0	1	4.6	141	147	2.66	1.27	115.748	0.88	3.07	1.8	0.68
0636	0	1	71	25.2	1	0	138	72	1	1	0	1	0	0	1	0	1	1	38.6387	47.1575	1	0	1	0	1	1	1	1	0	1	1	75	1	0	1	1	0	0	1	6.7	130	180	3.94	1.94	92.7835	1.66	3.8	1.93	0.94
0637	0	1	69	26.6	1	0	151	86	0	1	0	1	0	0	0	0	1	0	74.8625	73.0366	1	0	1	1	0	1	0	1	1	1	1	90	1	0	3	1	1	0	1	6.52	117	124	5.12	0.56	221.429	0.91	2.41	1.12	0.72
0638	0	1	64	27.8	1	0	124	78	0	1	0	1	1	0	0	0	1	0	89.8568	83.8663	1	1	0	1	0	1	0	1	0	1	0	95	1	0	3	0	1	0	1	11.12	149	276	5.27	4.87	56.6735	2.69	3.6	1.66	0.73
0639	0	1	78	25.7	0	1	160	80	0	1	0	1	0	0	0	1	0	1	55.6828	68.5849	1	1	0	0	1	1	1	1	0	0	0	75	1	0	2	0	1	0	0	5.74	142	231	3.36	1.93	119.689	1.72	4.79	2.83	1
0640	0	1	69	24.6	1	0	180	75	0	0	0	1	1	0	0	0	1	0	67.621	64.6156	1	1	0	1	0	0	1	1	0	0	1	90	1	0	3	1	1	0	1	4.33	134	132	2.22	1.7	77.6471	0.86	2.69	1.35	0.82
0641	1	1	72	17.1	1	0	160	78	0	1	0	1	0	0	0	1	0	1	55.0122	39.7961	1	0	1	1	0	1	0	1	1	1	1	75	1	0	3	1	1	0	1	4.29	105	136	3.62	0.52	261.538	0.63	3.78	1.86	1.31
0642	0	1	53	31.6	1	0	134	87	1	1	0	0	0	0	0	1	0	0	107.453	165.444	1	1	0	0	1	0	0	1	0	1	1	100	1	0	2	1	1	0	1	6.31	138	190	5.3	0.76	250	1.74	5.04	2.85	0.8
0643	0	1	82	26.2	1	0	148	70	1	0	0	0	0	0	0	0	0	1	45.1663	48.5659	1	1	0	1	0	0	0	1	0	1	1	75	1	0	3	1	1	0	1	4.71	123	159	2.78	1.31	121.374	0.78	4.52	2.21	1.54
0644	0	2	74	19.4	1	0	130	80	1	0	0	1	0	0	0	0	0	1	48.2286	52.4591	1	0	1	0	1	1	1	1	0	0	1	75	1	0	3	1	1	0	1	13.54	129	279	9.4	2.86	97.5524	2.18	4.63	2.42	1.02
0645	0	2	60	22.1	1	0	164	91	0	0	0	1	0	0	0	0	0	1	58.9878	69.4534	1	1	0	0	1	1	1	1	0	1	1	75	1	0	3	1	1	0	1	5.42	125	282	3.14	1.68	167.857	5.06	4.73	2	0.83
0646	0	1	66	25.4	1	0	120	80	1	0	0	0	0	0	0	1	0	0	117.604	121.398	1	0	1	0	1	0	0	1	0	1	1	100	1	0	3	1	1	0	1	6.77	153	174	4.23	2.11	82.4645	1.53	3.74	1.88	1.14
0647	0	1	60	26.6	1	0	110	80	1	0	0	0	0	0	0	1	0	0	110.937	94.0856	1	0	1	0	0	1	0	1	0	0	1	100	1	0	3	1	1	0	1	5.86	145	194	2.87	2.33	83.2618	6.85	4.61	1.39	0.74
0648	0	2	69	23	1	0	155	111	0	1	1	1	0	0	0	0	0	0	80.0564	68.4119	1	1	0	0	1	1	1	1	1	1	1	95	1	1	4	1	1	1	1	11.68	139	271	9.3	1.82	148.901	4.59	10.68	5.77	1.2
0649	0	1	62	21.5	1	0	143	90	0	0	0	0	0	0	0	0	1	0	99.9685	116.944	1	0	1	1	0	1	0	1	0	1	1	95	1	0	2	0	1	0	1	6.97	151	234	4.27	1.9	123.158	1.05	4.87	3.22	0.86
0651	0	1	61	23.3	1	0	160	70	0	1	0	1	0	0	0	0	0	0	93.559	93.559	1	1	0	0	1	1	0	1	0	0	0	95	1	0	2	1	1	0	1	8.06	145	291	4.81	2.63	110.646	0.96	6.65	3.74	1.74
0652	0	1	50	23.9	1	0	127	81	0	1	0	0	0	0	0	0	0	0	101.874	95.9516	1	1	0	1	0	0	0	1	1	0	1	100	1	0	2	1	1	1	0	12.89	148	235	93.1	4.9	47.9592	1.07	4.29	2.72	0.94
0653	0	1	50	26.3	0	1	160	91	0	0	0	1	0	0	1	0	1	0	68.3936	75.1652	1	1	0	1	0	1	1	1	0	1	1	90	1	0	3	1	1	0	1	6.32	166	149	5.09	0.85	175.294	NA	NA	NA	NA
0654	0	1	79	29.4	1	0	150	85	0	1	0	1	1	0	0	0	0	1	40.3093	52.7944	1	1	0	0	1	1	1	1	0	0	1	75	1	0	3	1	1	0	1	7.35	117	216	6.22	0.61	354.098	0.63	2.33	0.95	0.91
0655	0	2	64	33.7	1	0	140	90	1	0	0	1	0	0	1	0	0	0	84.1687	120.695	1	1	0	0	1	1	0	1	0	0	1	95	1	0	1	0	0	0	1	8.92	145	281	6.77	1.47	191.156	1.01	4.07	2.34	1.01
0656	0	1	64	24.5	0	1	124	70	0	1	0	0	0	0	0	1	0	0	66.7845	82.2589	1	1	0	1	0	1	0	1	0	0	1	90	1	0	2	0	1	0	1	4.88	152	127	2.59	1.58	80.3797	2.9	5.45	2.86	1.23
0657	0	2	73	24.8	1	0	132	78	1	1	0	1	0	0	0	0	0	0	68.5159	79.9353	1	0	1	1	0	1	1	1	0	1	1	90	1	0	2	1	1	0	1	7.26	121	269	4.07	2.45	109.796	1.89	3.4	1.82	1
0658	0	1	50	28	1	0	113	75	0	0	0	1	0	0	0	1	0	0	97.9339	129.159	1	0	1	1	0	1	0	1	0	1	1	95	1	0	3	1	1	0	1	14.55	178	187	12.37	1.32	141.667	1.2	4.89	2.89	1.09
0659	0	1	44	26	1	0	120	80	1	1	0	1	0	0	0	1	0	0	86.1468	85.24	1	1	0	1	0	1	0	1	0	0	1	95	1	0	3	1	1	0	1	9.83	119	220	8.12	1.26	174.603	2.42	3.04	1.05	1.03
0660	0	1	51	25.7	1	0	150	70	0	1	0	1	0	0	0	1	0	0	89.6016	100.212	1	1	0	1	0	0	1	1	0	1	1	95	1	0	3	1	1	0	1	7.31	145	188	5.31	1.3	144.615	1.32	3.07	1.34	1.02
0661	0	1	69	23.2	0	1	145	80	1	0	0	1	0	0	0	0	1	0	83.7592	94.8217	1	0	1	0	0	1	0	1	0	0	1	95	1	0	1	1	0	0	1	5.69	141	217	3.1	1.91	113.613	0.72	4.05	2.38	1.01
0662	0	2	64	26.7	0	1	113	52	1	1	0	1	1	0	0	0	0	1	57.1697	59.0967	1	1	0	1	0	1	1	1	0	1	1	75	1	0	2	1	1	0	1	8.76	85	312	6.74	1.38	226.087	1.07	3.82	2.37	0.84
0663	0	1	60	29.3	0	1	151	82	0	0	0	1	0	0	0	1	0	0	101.266	111.111	1	1	0	1	0	1	0	1	0	0	0	100	1	0	1	0	0	0	0	7.74	142	231	4.79	2.24	103.125	1.68	3.84	2.18	0.85
0664	0	2	73	23.1	1	0	130	81	1	0	0	1	0	0	0	0	0	1	51.7185	50.2819	1	1	0	1	0	1	0	1	0	1	1	95	1	0	3	1	1	0	1	10.09	114	245	7.57	1.8	136.111	0.87	3.83	1.58	1.66
0665	0	2	63	27	1	0	110	58	1	0	0	0	0	0	1	0	0	1	49.8602	72.8727	1	0	1	1	0	1	0	1	1	1	1	75	1	0	3	1	1	0	1	15	130	208	12.08	2.45	84.898	2.85	4.87	2.45	1.06
0666	0	1	69	24.7	1	0	138	98	0	1	0	1	0	0	0	0	0	0	66.3169	71.9781	1	1	0	0	1	1	0	0	0	0	0	90	1	0	2	1	1	0	1	5.66	144	91	3.08	1.93	47.1503	1.22	4.92	3.11	1.01
0667	0	2	61	20	1	0	150	80	1	1	0	1	0	0	0	0	0	0	69.5682	73.2951	1	1	0	1	0	1	1	1	1	1	1	90	1	0	3	1	1	0	1	6.89	130	196	4.18	2.24	87.5	1.21	4.12	2.12	1.17
0668	0	1	52	22.7	1	0	118	90	0	0	0	0	0	0	0	1	0	0	107.579	112.257	1	1	0	0	0	1	0	1	1	0	1	100	1	0	1	0	0	0	0	10.87	131	242	7.05	2.69	89.9628	0.93	3.58	1.9	1.07
0669	0	2	74	20.8	1	0	134	68	0	0	0	1	0	0	0	0	0	1	59.4377	68.5819	1	0	1	1	0	1	0	1	1	0	1	75	1	0	1	1	0	0	1	4.98	108	92	2.86	1.61	57.1429	1.3	4.64	2.86	1.11
0670	1	2	53	25.4	1	0	134	72	1	1	0	1	0	0	1	0	0	0	139.91	108.819	1	1	0	1	0	0	0	1	1	0	1	100	1	0	4	1	1	1	1	7.26	101	151	4.5	2.17	69.5853	1.1	6.15	3.85	1.03
0671	0	1	49	NA	1	0	169	107	0	1	0	1	0	0	0	1	0	0	NA	NA	1	0	1	0	0	1	0	1	0	0	1	90	1	0	3	1	1	0	1	26.27	200	247	23.57	1.23	200.813	1.4	7.04	4.1	1.26
0672	0	1	48	24.3	1	0	130	80	1	1	0	0	0	0	0	1	0	0	123.541	125.502	1	0	1	1	0	1	0	1	0	1	1	100	1	0	3	1	1	0	1	12.54	151	273	7	4.79	56.9937	6.24	5.98	2.11	0.8
0673	0	2	57	25.1	1	0	170	80	0	0	0	1	0	0	0	0	0	0	77.2115	93.5448	1	1	0	1	0	0	1	1	0	1	1	95	1	0	3	1	1	0	1	7.25	142	304	4.31	1.88	161.702	1.1	4.23	2.21	1.09
0674	0	1	55	22.7	1	0	120	80	0	0	0	0	0	0	0	1	0	0	89.8698	80.1249	1	1	0	0	0	0	0	1	0	0	1	95	1	0	2	1	1	0	1	6.79	145	280	4	2.22	126.126	3.03	6.55	3.71	0.97
0675	0	1	52	23.5	1	0	138	80	1	0	0	1	0	0	0	1	0	0	95.0052	79.5153	1	1	0	1	0	1	1	1	0	0	1	95	1	0	3	1	1	0	1	8.06	161	282	4.81	2.32	121.552	1.36	4.15	2.27	1.22
0676	1	1	70	18.7	1	0	90	56	1	0	0	0	0	0	0	0	0	1	59.2439	45.3042	1	1	0	0	0	1	0	1	0	0	1	100	1	0	2	1	1	0	1	11.04	130	175	7.73	1.07	163.551	0.38	3.4	1.93	1.27
0677	0	2	66	26	1	0	142	80	0	1	0	1	0	0	0	0	0	0	65.9099	59.1499	1	0	1	0	1	1	1	1	1	0	1	90	1	0	2	1	1	1	1	8.01	130	198	5.02	2.48	79.8387	1.64	4.76	2.52	1.32
0678	1	1	65	24.4	1	0	128	76	1	1	0	1	0	0	1	1	0	0	80.3832	62.4252	1	0	1	0	1	1	1	1	0	1	1	95	1	0	1	0	0	0	1	7.55	121	230	4.54	1.66	138.554	0.71	4.38	2.62	1.1
0679	0	2	61	24.5	1	0	109	99	0	0	0	1	0	0	1	1	0	0	70.0743	91.2288	1	0	1	0	0	1	0	1	1	0	1	90	1	0	4	1	1	1	1	12.32	122	237	10.79	1.15	206.087	1.24	5.35	3.25	1.17
0680	0	2	49	22.7	1	0	165	95	0	0	0	1	0	0	0	0	0	0	135.619	125.695	1	1	0	1	0	1	0	1	0	1	0	100	1	0	1	1	0	0	1	6.19	103	307	4.41	1.39	220.863	2.74	6.07	3.34	1.01
0681	0	1	87	23.1	1	0	130	80	1	1	0	1	0	0	1	0	1	1	50.3854	60.3206	1	1	0	0	0	1	1	1	1	1	1	75	1	0	3	1	1	0	1	4.54	139	152	3.11	0.94	161.702	0.47	4.65	2.32	1.43
0682	0	1	61	26.3	1	0	122	77	1	0	0	1	0	0	0	1	0	0	86.2295	116.827	1	1	0	1	0	1	0	1	1	0	1	95	1	0	3	1	1	0	1	6.28	145	232	3.34	2.19	105.936	0.47	4.39	2.71	1.22
0683	0	1	70	26.6	1	0	120	80	1	0	0	1	0	0	0	1	0	0	70.5018	78.5336	1	1	0	1	0	1	0	1	0	1	1	90	1	0	1	1	0	0	1	9.58	132	175	7.35	1.51	115.894	NA	NA	NA	NA
0684	0	1	60	26.6	1	0	140	70	1	1	0	1	0	0	0	1	0	0	109.485	117.088	1	1	0	1	0	1	0	1	1	0	1	100	1	0	3	1	1	0	1	9.11	150	153	6.96	1.53	100	3.21	2.48	0.87	0.77
0685	0	1	63	20	1	0	86	59	0	0	0	1	0	0	1	0	1	1	55.9255	68.7277	1	1	0	0	1	1	0	1	1	0	1	75	0	0	2	1	1	0	1	8.64	127	193	6.89	1.15	167.826	1.12	4.34	2.57	0.93
0686	0	1	68	24.2	1	0	114	80	0	0	0	0	0	0	0	1	0	1	56.3648	67.5139	1	1	0	1	0	1	0	1	1	0	1	75	1	0	3	1	1	0	1	7.17	143	178	4.82	1.76	101.136	1.66	5.24	2.96	1.19
0687	0	1	79	21.7	1	0	116	66	0	0	0	0	0	0	0	0	1	1	41.7471	43.6979	1	1	0	0	1	1	0	1	1	1	1	75	1	0	3	1	1	0	1	7.51	129	157	3.6	2.24	70.0893	1.1	4.76	3.09	0.81
0688	0	1	64	28.2	1	0	210	100	0	0	0	1	0	0	0	0	1	0	107.317	107.317	1	1	0	1	0	1	1	1	0	1	1	100	1	0	2	1	1	0	1	8.96	166	170	6.97	1.38	123.188	1.97	5.71	3.54	1.09
0689	0	1	66	23.9	1	0	144	95	0	0	0	1	0	0	0	1	0	0	76.1226	77.0624	1	0	1	1	0	1	0	1	1	0	1	95	1	0	2	0	1	0	1	12.79	138	228	11.45	0.99	230.303	1.56	4.29	2.41	1.2
0690	0	1	68	21	1	0	92	54	0	0	0	0	0	0	0	1	0	1	45.5784	46.0342	1	0	1	0	1	1	0	1	1	0	1	75	1	0	3	1	1	0	1	12.84	144	180	11.95	0.48	375	0.63	4.33	1.82	1.92
0691	0	1	37	27.7	1	0	124	87	0	0	0	0	0	0	0	1	0	0	114.47	93.2718	1	0	1	1	0	1	0	1	0	0	1	100	1	0	1	0	0	0	1	12.6	153	290	11.55	0.67	432.836	0.65	5.07	2.82	1.28
0692	0	1	75	21.7	0	1	138	91	0	0	0	0	0	0	0	1	0	0	65.2251	71.1547	1	1	0	1	0	1	0	1	0	1	1	90	1	0	3	0	1	0	1	5.32	130	240	3.01	1.24	193.548	0.57	3.62	1.89	1.27
0693	0	2	66	23.9	0	1	127	83	1	0	0	1	0	0	0	0	0	0	73.5307	82.5608	1	1	0	0	1	1	1	1	0	0	1	90	1	0	1	0	0	0	0	5.5	118	238	3.3	1.68	141.667	2.28	7.64	5.04	1.33
0694	0	2	69	20.9	1	0	148	74	1	0	0	0	0	0	0	0	0	1	49.5882	56.0163	1	1	0	0	1	1	0	1	0	1	1	75	1	0	3	1	1	0	1	5.18	109	187	3.38	1.45	128.966	0.8	5.14	2.89	1.55
0695	0	1	70	21.5	1	0	119	64	0	0	0	1	0	0	0	0	1	1	44.5851	51.5109	1	1	0	0	1	1	0	1	1	1	1	75	1	0	3	1	1	0	1	5.7	151	162	3.38	1.72	94.186	1.83	3.76	1.89	0.99
0696	0	1	59	22.7	1	0	108	58	1	1	0	0	0	0	0	1	0	0	91.8465	102.216	1	1	0	0	0	0	0	1	1	0	1	100	1	0	3	1	1	0	1	11.3	148	275	10.2	0.92	298.913	0.57	4.73	2.36	1.47
0697	0	2	75	24	1	0	126	85	0	1	0	1	0	0	0	0	0	0	66.8559	70.4375	1	1	0	0	0	1	0	1	1	0	1	90	0	0	2	1	1	0	1	10.44	116	238	9.82	0.39	610.256	0.61	3.82	1.93	1.43
0698	0	1	42	28.6	0	1	155	86	0	1	0	1	1	0	0	0	1	0	179.707	179.707	1	1	0	1	0	1	1	1	0	1	1	100	1	0	3	0	1	0	1	8.35	151	234	5.84	1.97	118.782	2.27	4.01	1.97	1.19
0699	0	2	64	27.6	1	0	142	72	1	0	0	1	0	0	1	0	0	0	70.9613	84.4195	1	1	0	1	0	1	1	1	1	1	1	90	1	0	3	0	1	0	1	5.01	132	194	2.53	1.73	112.139	1.27	4.17	1.93	1.34
0700	0	1	61	26.1	1	0	122	74	0	0	0	1	0	0	1	0	0	0	63.3292	53.6539	1	0	1	1	0	1	0	1	1	0	1	85	1	0	3	0	1	0	1	11.83	134	259	10.72	0.76	340.789	5.41	3.7	1.21	0.66
0701	0	1	70	22.8	1	0	90	60	1	0	0	1	0	0	1	1	0	0	60.0843	68.0473	1	1	0	0	0	0	0	1	1	0	1	100	1	0	3	0	1	0	1	10.79	111	227	9.36	1.05	216.19	1.37	5.21	3.08	1.33
0702	0	1	54	27.7	0	1	150	90	1	0	0	1	0	0	0	0	0	0	114.947	130.622	1	0	1	1	0	1	1	1	0	1	1	100	1	0	1	0	0	0	1	7	162	224	4.59	1.78	125.843	9.11	5.49	0.79	0.88
0703	0	1	51	26.9	1	0	158	82	0	1	0	1	1	0	0	0	1	0	95.0454	85.2469	1	0	1	1	0	1	1	1	1	0	0	95	1	0	3	1	1	0	1	7.97	146	224	5.29	2.17	103.226	1.75	4.62	2.49	1.23
0704	0	2	71	24.6	1	0	136	82	1	0	0	1	0	0	0	0	0	1	34.4968	38.9007	1	1	0	0	0	1	1	1	0	1	0	70	1	0	3	1	1	0	1	4.94	82	293	3.67	0.84	348.81	0.96	5.37	3.1	1.35
0705	0	1	54	23.9	1	0	110	62	0	0	0	0	0	0	0	0	0	0	62.6949	73.4811	1	0	1	1	0	1	0	1	1	0	1	100	1	0	1	0	0	0	1	6.07	133	159	4.62	0.95	167.368	1.24	3.89	1.8	1.35
0706	0	1	46	25.6	1	0	124	70	1	1	0	0	1	0	0	1	0	0	97.608	98.7984	1	1	0	0	0	1	0	1	1	0	1	95	1	0	2	1	1	0	1	7.41	150	248	4.96	1.84	134.783	1.46	3.61	2.13	0.96
0707	0	2	65	26.7	0	1	148	90	0	1	0	1	0	0	0	0	0	0	69.0951	57.2303	1	0	1	0	1	1	1	1	0	1	1	90	1	0	1	1	0	0	1	8.59	124	185	6.79	1.58	117.089	2.04	3.97	1.92	1.09
0708	1	1	75	14.5	1	0	105	62	0	0	0	0	0	0	0	1	0	1	39.2281	29.7983	1	1	0	0	1	1	0	1	1	1	1	75	1	0	3	1	1	0	1	8.53	122	260	6.93	0.98	265.306	0.99	3.02	1.49	0.95
0710	0	1	46	21.5	1	0	103	67	0	0	0	0	0	0	0	0	0	1	46.362	51.3167	1	1	0	1	0	1	0	1	1	0	1	75	1	1	2	0	1	0	1	13.4	122	315	11.16	1.94	162.371	1.71	6.41	3.52	1.53
0711	0	1	52	29.7	1	0	140	72	0	0	0	1	0	0	0	1	0	0	113.242	145.87	1	0	1	1	0	1	0	1	1	0	1	100	1	0	1	0	0	0	0	8.68	153	183	6.35	1.71	107.018	2.12	4.98	2.77	1.15
0712	0	2	67	27.2	1	0	150	86	1	0	0	1	0	0	0	0	0	0	68.7759	78.1544	1	1	0	0	1	1	1	0	0	1	1	90	1	0	1	0	0	0	1	5.79	119	242	4.66	0.69	350.725	0.5	3.81	2.36	1.09
0713	0	2	71	22	1	0	160	80	0	1	0	1	0	0	0	0	0	1	56.2703	66.3486	1	0	1	0	1	1	1	0	1	0	1	75	1	0	3	1	1	0	1	7.37	133	286	5.58	1.31	218.321	2.35	5.65	3.3	1.1
0715	0	1	66	NA	1	0	146	81	0	1	0	1	0	0	0	0	1	0	NA	NA	1	1	0	1	0	1	1	1	1	1	1	70	1	0	4	1	1	1	1	8.41	122	212	6.56	1.15	184.348	1.22	4.13	2.18	1.03
0716	0	1	54	27.8	1	0	119	76	0	1	0	0	0	0	0	1	0	0	96.0906	87.6121	1	0	1	1	0	1	0	1	0	1	1	95	1	0	3	1	1	0	1	8.5	150	193	4.92	2.89	66.782	2.33	4.3	2.34	0.97
0717	0	1	60	20.1	1	0	106	62	0	0	0	0	0	0	0	1	0	1	48.8998	62.3338	1	1	0	1	0	0	0	1	1	0	1	75	1	0	3	1	1	0	1	14.83	125	152	11.65	1.4	108.571	0.26	2.51	0.82	1.4
0718	1	1	78	25.4	1	0	112	56	0	0	1	1	0	0	0	0	0	0	75.7946	59.2145	1	0	1	1	0	1	0	1	1	1	1	100	1	0	3	0	1	0	1	23.8	165	283	21.37	1.46	193.836	NA	NA	NA	NA
0719	1	2	70	16.9	1	0	98	74	0	1	0	0	0	0	0	1	0	1	48.4923	38.2834	1	0	1	0	0	1	0	1	1	1	1	75	0	1	2	1	1	0	1	12.32	115	144	11.63	0.59	244.068	2.56	5.51	2.73	1.18
0720	0	2	77	19.9	1	0	140	65	0	1	0	1	0	0	0	1	0	1	46.0149	64.7965	1	1	0	1	0	1	0	1	1	1	1	75	0	0	3	0	1	0	1	5.42	109	258	4.15	1.08	238.889	0.93	4.36	2.3	1.12
0721	1	1	51	24.7	1	0	102	63	1	0	0	1	0	0	1	0	0	1	57.5547	45.1281	1	0	1	1	0	0	0	1	1	0	1	75	1	0	3	1	1	1	1	32.8	151	281	30.9	0.7	401.429	1.06	4.76	2.71	1.12
0722	0	2	69	25	1	0	180	80	1	1	0	1	0	0	0	0	0	1	48.6445	53.3331	1	1	0	0	1	1	1	1	0	0	0	75	0	0	2	0	1	0	1	7.53	121	332	5.14	1.52	218.421	1.15	4.5	2.22	1.33
0723	0	1	41	26.2	1	0	118	73	0	1	0	0	0	0	0	1	0	0	126.214	133.863	1	0	1	1	0	1	0	1	0	0	1	100	0	0	3	0	1	0	1	9.15	166	156	6.01	1.99	78.392	1.11	5.26	3.14	1.07
0724	0	1	75	25.3	1	0	137	79	0	1	0	1	0	0	0	0	0	1	56.8699	62.3735	1	1	0	1	0	0	1	1	1	0	0	75	0	0	3	0	1	0	1	10.5	133	257	6.09	3.23	79.5666	1.46	4.04	2.34	1.1
0725	1	2	65	19.6	1	0	172	94	0	0	0	1	0	0	0	0	0	1	38.967	22.4124	1	0	1	1	0	1	1	1	1	0	1	75	1	0	3	0	1	0	1	5.72	123	127	4.02	1.21	104.959	1.23	4.05	2.17	1.16
0726	0	2	60	23.8	0	1	106	64	0	1	0	0	0	0	0	0	0	0	82.9933	140.628	1	1	0	1	0	1	0	1	0	0	0	95	0	0	3	1	1	0	1	7.63	133	241	4.74	2.29	105.24	1.69	5.96	3.12	1.15
0728	0	2	72	19.4	1	0	124	60	1	1	0	1	0	0	0	0	0	1	45.6936	59.0865	1	1	0	0	0	0	1	1	0	1	1	75	0	0	2	1	1	0	1	3.52	103	199	2.74	0.56	355.357	1.07	5.44	2.57	1.77
0730	0	1	67	24.8	1	0	136	84	0	1	0	1	1	0	0	0	1	0	86.7631	85.5746	1	1	0	1	0	1	0	1	1	1	1	100	1	0	3	1	1	1	1	5.46	127	105	4.15	0.94	111.702	0.76	4.64	2.44	1.41
0731	0	1	64	21.1	1	0	120	80	1	0	0	0	0	0	1	0	0	1	58.4276	60.9407	1	0	1	0	0	0	0	1	0	0	0	75	0	0	2	0	1	1	0	5.66	131	162	3.68	1.31	123.664	0.99	5.83	3.21	1.38
0732	0	2	59	22.3	1	0	120	80	1	1	0	1	0	0	0	0	0	0	75.6092	76.9128	1	0	1	0	0	1	1	1	0	1	1	95	1	0	1	0	0	0	1	6.17	119	224	3.53	2.07	108.213	6.83	5.92	1.22	1.05
0733	0	1	53	24.2	1	0	189	110	0	1	0	1	0	0	0	0	0	0	72.2814	72.9901	1	1	0	1	0	1	0	1	1	1	1	90	1	0	3	1	1	0	1	22.4	136	179	20.38	0.42	426.19	1.14	5.28	2.67	1.34
0734	1	1	52	24.2	1	0	96	53	0	1	0	0	0	0	0	0	0	1	54.5693	29.3018	1	1	0	0	0	0	0	1	1	0	1	75	0	0	3	1	1	0	1	9.96	151	192	8.46	0.87	220.69	2.52	4.68	1.8	1.62
0735	0	1	69	25.5	1	0	170	75	1	0	0	1	0	0	0	0	1	1	58.9306	60.8523	1	1	0	0	1	1	1	1	0	1	1	75	1	0	4	1	1	1	1	4.35	122	175	2.46	1.36	128.676	1.71	4.81	2.41	1.24
0736	0	2	59	28.1	1	0	120	80	1	1	0	1	0	0	0	1	0	0	84.1687	121.577	1	1	0	1	0	1	0	1	0	1	1	95	1	0	2	0	1	0	1	6.26	137	189	3.44	2.36	80.0847	1.34	5.22	2.82	1.64
0737	0	1	81	24.7	1	0	190	90	0	0	0	1	0	0	0	0	1	1	38.9876	49.7429	1	0	1	1	0	1	1	1	0	1	1	75	0	0	3	0	1	0	1	6.35	116	206	4.36	1.47	140.136	NA	NA	NA	NA
0738	0	1	81	NA	1	0	156	76	0	0	0	1	0	0	0	0	0	0	NA	NA	1	1	0	1	0	1	0	1	1	1	1	90	0	0	2	1	1	0	1	5.75	125	228	4.12	0.99	230.303	0.55	3.07	1.2	1.11
0739	0	1	76	21.1	1	0	118	72	0	1	0	0	0	0	0	0	1	1	54.9435	66.986	1	1	0	0	1	0	0	1	0	1	1	75	0	0	2	0	1	0	1	5.79	123	159	4.26	0.7	227.143	1.13	4.69	2.58	1.23
0740	0	1	54	22.5	1	0	110	68	0	0	0	0	0	0	0	0	1	0	86.503	99.0397	1	1	0	1	0	1	0	0	1	0	1	95	1	0	3	0	1	0	1	14.96	141	175	14.47	0.39	448.718	1.72	6.6	4.08	1.49
0741	0	2	70	22	1	0	120	80	0	0	0	1	0	0	0	0	0	1	57.425	47.4381	1	1	0	1	0	0	0	1	1	0	1	75	0	0	3	1	1	0	1	13.35	132	129	12.01	0.92	140.217	1.87	3.43	1.41	1.22
0742	0	1	45	24.5	1	0	98	65	0	0	0	0	0	0	0	0	0	0	73.7023	74.4178	1	0	1	0	0	0	0	1	1	0	1	90	1	0	3	1	1	0	1	12.42	140	203	7.72	3.67	55.3134	1.11	4.27	2.22	1.16
0743	0	1	42	26.1	1	0	118	90	0	1	0	0	0	0	0	1	0	0	110.087	103.206	1	1	0	0	0	1	0	1	0	1	0	100	0	0	3	0	1	0	1	7.78	161	345	4.94	2.12	162.736	3.64	5.74	2.83	0.99
0744	0	2	79	21.8	1	0	110	83	1	1	0	1	1	0	1	0	0	1	43.6067	47.6231	1	1	0	0	0	1	1	1	0	0	1	75	0	0	3	1	1	0	1	5.61	141	144	3.8	1.51	95.3642	8.99	4.58	0.56	0.91
0745	0	2	76	21.6	1	0	106	68	0	0	0	1	0	0	0	0	0	1	58.8721	60.8678	1	0	1	0	0	0	0	1	0	0	1	75	0	0	3	1	1	0	1	14.22	119	228	12.18	0.97	235.052	1.4	5.38	4.03	1.27
0746	0	1	38	29.1	1	0	120	80	0	0	0	0	0	0	0	1	0	0	92.9739	123.244	1	0	1	1	0	1	0	1	1	0	1	95	0	0	1	0	0	0	0	8.86	144	233	6.72	1.27	183.465	2.6	4.79	2.09	1.38
0747	0	1	68	28.7	1	0	128	78	0	1	0	1	0	0	0	0	1	0	100.077	94.8782	1	1	0	1	0	1	0	1	0	1	1	95	0	0	2	0	1	0	1	8.62	134	287	5.63	2.04	140.686	0.82	4.11	2.11	1.31
0748	0	1	61	23.3	1	0	130	80	1	0	0	1	0	0	0	0	1	1	57.8551	78.6236	1	1	0	1	0	1	1	1	0	0	1	85	0	0	4	1	1	1	1	4.9	136	151	2.56	1.69	89.3491	1.21	3.53	1.76	1.18
0749	0	1	71	25.4	0	1	164	102	0	0	0	1	0	0	0	0	1	1	44.5763	57.1134	1	1	0	0	1	0	1	1	0	1	1	75	0	0	1	0	0	0	1	6.15	150	136	4.08	1.25	108.8	1.37	4.64	2.31	1.22
0750	0	1	79	26.1	1	0	149	72	1	1	0	1	0	0	0	0	0	0	64.7212	58.2491	1	1	0	1	0	1	1	1	0	0	0	90	0	0	3	0	1	0	1	7.01	150	206	3.64	2.8	73.5714	1.66	4.61	2.35	1.13
0751	0	1	82	19.2	1	0	110	70	0	0	0	1	0	0	1	0	0	1	46.2966	45.2323	1	1	0	0	0	0	0	1	1	0	1	75	0	0	3	0	1	0	1	9.44	117	190	8.52	0.79	240.506	0.75	4.5	2.24	1.72
0752	0	1	75	18.6	1	0	129	70	0	0	0	1	0	0	0	1	0	0	65.1329	55.182	1	1	0	0	0	0	0	1	1	0	1	90	0	0	2	1	1	0	1	6.88	133	165	5.46	0.91	181.319	0.45	3.88	1.9	1.62
0753	0	1	66	24.2	1	0	142	75	1	1	0	1	0	0	1	0	0	0	64.3061	63.5406	1	1	0	0	1	1	0	1	1	1	1	90	1	0	3	1	1	0	1	8.76	122	198	6.31	1.76	112.5	0.53	3.54	1.41	1.52
0754	0	1	63	23.6	1	0	120	90	0	1	0	1	0	0	0	1	0	0	62.3385	73.6044	1	1	0	1	0	1	0	1	0	0	1	85	0	0	2	1	1	0	1	5.71	107	213	3.87	1.24	171.774	1.35	5.13	3.04	1.14
0755	0	1	75	24.2	1	0	180	98	1	1	0	1	1	0	1	0	1	1	59.5063	58.8377	1	1	0	0	1	1	1	1	0	1	1	75	0	0	3	1	1	0	1	5.5	160	243	4.27	0.79	307.595	0.62	3.2	1.22	1.56
0756	0	1	69	21.5	1	0	114	68	0	1	0	0	0	0	0	1	0	1	48.2206	66.3033	1	1	0	1	0	0	0	1	1	1	1	75	0	0	3	1	1	0	1	8.43	127	243	6.2	1.65	147.273	1.26	7.41	4.4	1.61
0757	0	2	72	19.8	1	0	176	92	1	1	0	1	0	0	1	0	0	0	86.7193	69.3754	1	0	1	0	1	1	0	1	1	0	1	95	0	0	1	0	0	0	1	6.81	110	180	4.77	1.59	113.208	1.6	3.88	1.71	1.33
0758	0	1	50	21.1	1	0	138	90	0	0	0	1	0	0	0	0	1	0	67.8874	71.7013	1	1	0	1	0	1	1	1	0	1	1	90	0	0	3	1	1	0	1	9.28	171	150	7.56	0.99	151.515	0.68	3.8	1.86	1.36
0759	0	1	58	22.8	1	0	150	98	1	0	0	1	0	0	0	0	0	0	65.1589	60.8962	1	1	0	1	0	1	1	1	0	0	1	90	1	0	1	0	0	0	1	9.23	146	176	6.74	1.78	98.8764	0.81	4.47	2.14	1.56
0760	0	1	76	23	0	1	170	80	1	0	0	1	0	0	1	0	0	1	47.0887	47.9771	1	1	0	1	0	0	1	1	0	1	0	75	0	0	3	1	1	0	1	7.12	119	180	5.85	0.96	187.5	0.52	2.61	0.99	1.25
0761	0	1	58	27.4	1	0	91	61	0	1	0	1	0	0	0	1	0	0	67.4542	96.2347	1	0	1	1	0	1	0	1	1	0	0	90	1	0	2	0	1	0	0	10.31	135	229	8.15	1.47	155.782	0.87	4.97	2.38	1.83
0762	0	2	70	25.1	1	0	110	70	0	0	0	1	0	0	0	0	0	1	38.2504	49.3005	1	1	0	1	0	1	0	1	0	0	1	75	1	0	3	1	1	0	1	6.76	120	292	4.73	1.53	190.85	2.24	4.31	2.18	1.23
0763	0	2	42	24.4	1	0	130	70	0	0	0	0	0	0	0	0	0	0	79.48	122.969	1	1	0	1	0	1	0	1	0	0	0	95	1	0	2	0	1	0	1	4.76	129	145	2.29	1.73	83.815	0.46	4.73	2.26	1.8
0764	0	2	64	24.2	0	1	110	50	1	1	0	1	1	0	0	0	0	0	68.9698	84.4529	1	0	1	0	1	1	1	0	1	0	1	100	0	0	3	1	1	0	1	4.54	117	228	1.65	2.12	107.547	3.03	4.58	2.07	1.22
0766	0	1	77	20.8	1	0	146	74	0	1	0	1	0	0	0	1	0	1	36.435	43.857	1	0	1	0	1	0	0	1	1	1	1	100	0	0	3	1	1	0	1	5.31	147	160	3.9	0.98	163.265	1.59	5.21	2.77	1.44
0767	0	1	56	26.4	1	0	140	100	0	0	0	1	0	0	0	0	0	0	101.283	110.353	1	1	0	1	0	1	0	1	0	0	1	100	1	0	2	1	1	0	1	5.48	120	177	3.88	0.83	213.253	0.56	3.17	1.45	1.27
0768	0	2	74	18.4	1	0	140	72	1	1	0	1	0	0	1	0	0	1	36.4797	39.8732	1	1	0	1	0	0	0	1	0	0	1	75	0	0	1	0	0	0	1	5.29	122	181	3.23	1.72	105.233	0.67	3.7	1.44	1.84
0769	0	1	51	27	1	0	158	98	0	0	0	1	0	0	0	1	0	0	93.5931	101.211	1	1	0	1	0	1	1	1	0	1	0	95	1	0	3	0	1	0	1	5.26	139	196	3.55	1.32	148.485	0.71	3.24	1.38	1.31
0770	0	1	62	25.4	1	0	128	87	1	0	0	0	1	0	0	0	0	0	97.2086	88.5952	1	0	1	1	0	1	0	1	1	0	0	95	0	0	2	0	1	1	0	5.15	158	116	3.33	1.33	87.218	0.61	3.32	1.29	1.59
0771	0	2	51	25.3	1	0	106	70	0	0	0	0	0	0	0	0	0	0	118.819	105.109	1	1	0	1	0	1	0	1	0	0	1	100	0	0	1	0	0	0	1	6.52	122	186	3.96	2.05	90.7317	0.86	5.74	2.75	1.91
0772	0	1	50	26.5	1	0	176	96	1	0	1	1	0	0	0	1	0	0	78.5422	75.5501	1	1	0	1	0	1	1	1	1	1	0	95	0	0	2	0	1	0	0	6.78	160	248	3.69	2.53	98.0237	2.25	6.09	3.16	1.36
0773	0	1	65	23.3	1	0	150	80	1	0	0	1	1	0	0	0	1	0	89.3949	94.455	1	0	1	1	0	1	1	1	0	1	1	95	0	0	3	0	1	0	1	3.33	141	179	1.85	1.03	173.786	0.5	2.63	0.91	1.39
0774	0	1	63	25.2	1	0	122	88	0	0	0	1	0	0	0	1	0	0	96.2239	92.3749	1	1	0	1	0	1	1	1	1	0	1	95	0	0	3	1	1	0	1	7.83	140	278	5.71	1.56	178.205	3.31	5.43	2.33	1.4
0775	0	1	65	27.2	0	1	135	78	1	0	0	1	0	0	0	1	0	0	104.382	173.97	1	1	0	0	0	1	1	1	0	1	0	95	1	0	2	1	1	0	1	8	139	209	5.79	1.55	134.839	0.55	3.51	1.07	1.73
0776	0	1	62	19.6	1	0	128	72	0	1	0	0	0	0	0	1	0	1	55.3671	47.6773	1	0	1	0	0	1	0	1	1	1	1	75	0	0	3	1	1	0	1	18.87	133	285	17.83	0.79	360.759	1.38	10.09	5.73	2.01
0777	0	1	51	26.6	1	0	110	74	0	0	0	0	0	0	0	1	0	0	113.213	106.047	1	1	0	1	0	1	0	1	0	0	1	100	0	0	2	1	1	0	1	10.05	140	165	7.24	1.65	100	1.94	4.78	2.18	1.35
0778	0	1	74	24.3	1	0	120	80	1	0	0	1	0	0	0	0	0	0	64.4442	67.9277	1	1	0	1	0	0	1	1	0	1	1	90	0	0	1	0	0	0	1	4.72	133	214	3.27	0.89	240.449	0.72	2.99	1.29	1.27
0779	0	2	63	25.7	1	0	130	80	0	1	0	0	0	0	0	0	0	0	74.7993	112.199	1	1	0	0	0	1	0	1	0	0	1	90	0	0	3	1	1	0	1	6.89	145	241	5.32	1.29	186.822	1.97	5.81	2.88	1.67
0780	0	2	73	21.3	1	0	137	76	0	1	0	1	0	0	0	0	0	0	64.2656	57.6174	1	0	1	1	0	1	0	1	1	1	1	100	0	0	3	1	1	0	1	8.67	127	185	6.18	1.83	101.093	1.83	4.18	2.17	1.2
0781	0	1	53	23	1	0	145	95	1	1	0	1	0	0	1	1	0	1	50.5753	50.5753	1	0	1	1	0	0	1	1	0	1	1	75	0	0	3	1	1	0	1	10.41	123	332	8.22	1.21	274.38	0.9	2.74	1.25	1.04
0782	0	1	53	23.6	1	0	138	75	0	0	0	1	0	0	0	1	0	0	76.4441	83.3935	1	0	1	1	0	1	0	1	1	1	1	95	1	0	3	1	1	0	1	7.99	144	195	6.6	1.06	183.962	3.68	5.76	NA	1.42
0783	0	1	66	21.5	1	0	95	60	0	0	0	1	0	0	0	1	0	1	58.425	83.7135	1	0	1	0	0	0	0	1	1	0	1	75	1	0	3	0	1	0	1	14.46	140	183	13.61	0.57	321.053	1.12	4.48	2.71	1.27
0784	0	1	53	21.8	1	0	127	72	0	0	0	1	0	0	0	1	0	0	72.5161	82.8756	1	0	1	0	0	1	0	1	1	1	1	90	0	0	1	0	0	0	0	16.5	118	216	12.7	1.95	110.769	0.83	2.88	1.39	0.98
0785	0	1	49	25.9	1	0	91	51	0	1	0	0	0	0	0	1	0	0	66.3578	82.226	1	1	0	1	0	0	0	1	0	0	1	90	0	0	3	0	1	0	1	10.47	147	126	7.78	1.53	82.3529	1.15	3.45	1.34	1.48
0786	0	2	72	22.4	1	0	150	70	0	0	0	1	0	0	0	0	0	1	52.8041	67.3708	1	1	0	1	0	1	0	1	0	1	1	75	0	0	2	1	1	0	1	8.36	141	205	6.34	1.43	143.357	0.81	2.54	0.79	1.49
0787	0	1	66	26	1	0	137	80	0	1	1	1	0	0	0	1	0	0	71.6178	72.3716	1	0	1	1	0	1	1	1	1	1	1	90	1	0	3	1	1	0	1	8.45	96	306	6.68	0.97	315.464	1.72	2.87	1.31	0.78
0789	0	2	74	20.5	1	0	154	88	1	1	0	1	0	0	0	0	0	1	41.8182	60.1596	1	1	0	1	0	1	1	1	0	1	0	75	1	0	2	1	1	0	1	6.46	128	224	4.21	1.9	117.895	3.48	6.37	3.01	1.63
0790	0	1	54	19.9	1	0	93	54	0	0	0	0	0	0	0	1	0	0	80.7433	82.9554	1	1	0	0	0	1	0	1	1	1	1	95	0	0	2	1	1	0	0	9.37	146	207	7.44	1.17	176.923	0.72	5.21	2.84	1.56
0791	0	1	85	17.1	1	0	98	53	1	0	0	0	0	0	0	0	0	1	46.6925	51.7209	1	1	0	0	0	0	0	1	1	1	1	75	0	0	3	1	1	0	1	9.03	124	217	7.94	0.53	409.434	1.14	4.31	1.94	1.3
0792	0	1	52	23.2	1	0	112	60	0	0	0	0	0	0	0	1	0	0	86.8413	87.9003	1	1	0	0	0	0	0	1	1	0	1	95	1	0	2	0	1	0	1	10.55	121	218	8.92	0.81	269.136	1.14	4.9	3.13	1.46
0793	0	1	61	25.5	1	0	120	70	0	1	0	0	0	0	0	1	0	1	57.401	55.6072	1	1	0	1	0	1	0	1	1	0	1	75	0	0	2	0	1	0	1	7.7	150	265	4.41	2.42	109.504	1.8	3.95	2.06	1
0794	0	2	66	22.2	1	0	154	90	0	0	0	1	0	0	0	0	0	0	73.9374	91.5415	1	1	0	1	0	1	1	1	1	0	1	90	1	0	2	1	1	0	1	7.69	109	296	4.74	2.5	118.4	1.22	4.57	2.01	1.93
0795	0	1	77	14.9	1	0	105	50	0	0	0	0	0	0	0	1	0	1	38.9725	47.5694	1	0	1	0	0	0	0	1	0	0	1	75	0	0	2	1	1	0	1	5.29	105	102	4.02	0.74	137.838	0.46	3.08	1.21	1.36
0796	0	1	55	21.9	1	0	210	109	0	1	0	1	0	0	0	1	0	0	74.0227	70.0853	1	1	0	1	0	1	1	1	0	1	1	90	0	0	2	1	1	0	1	6.81	149	138	4.37	1.93	71.5026	9.42	6.06	0.72	1.41
0798	0	1	66	22.2	1	0	128	88	1	0	0	0	0	0	0	1	0	0	75.1748	70.2291	1	0	1	1	0	1	0	1	1	0	1	95	1	0	1	0	0	0	1	10.09	134	175	7.41	1.69	103.55	1.72	4.43	2.33	1.28
0799	0	1	55	28.7	1	0	134	92	1	0	0	0	0	0	0	1	0	0	96.9067	99.1344	1	1	0	1	0	1	0	1	0	1	1	95	0	0	2	1	1	0	1	5.98	145	240	3.34	1.8	133.333	NA	NA	NA	NA
0800	0	1	69	19.1	1	0	140	62	0	0	0	1	0	0	0	0	0	1	37.8552	52.381	1	1	0	1	0	1	1	1	1	1	1	75	0	0	3	1	1	0	1	10.2	132	196	7.17	1.99	98.4925	2.34	5.68	2.68	1.33
0801	0	1	66	30.5	1	0	160	80	0	1	0	1	0	0	0	0	0	0	100.114	112.068	1	1	0	0	1	1	1	1	0	0	1	100	0	0	3	0	1	0	1	8.04	165	193	5.89	1.65	116.97	0.84	2.99	1.53	1.05
0802	0	2	60	28.2	1	0	118	78	1	1	0	1	1	0	0	0	0	0	99.5987	101.514	1	1	0	1	0	1	1	1	0	0	0	100	0	0	3	1	1	0	1	9.16	127	199	5.76	2.43	81.893	2.45	4.19	1.9	1.23
0803	0	2	66	23.4	1	0	143	94	1	1	0	1	1	0	0	0	0	1	53.4513	63.5218	1	1	0	0	1	1	0	1	0	1	1	85	0	0	1	1	0	0	1	10.22	129	227	7.7	1.88	120.745	0.88	4.42	1.5	2.15
0804	0	1	48	19.7	1	0	96	70	0	0	0	0	0	0	0	0	0	0	69.6822	98.627	1	0	1	1	0	1	0	1	1	0	1	90	1	0	2	0	1	0	1	11.4	130	182	9.03	1.19	152.941	1.94	4.26	2.68	1.01
0805	0	2	49	20.7	1	0	132	76	0	0	0	0	0	0	0	0	0	0	96.311	82.5523	1	0	1	1	0	1	0	1	0	1	1	95	1	0	1	0	0	0	1	7.51	137	202	4.94	1.98	102.02	1.23	5.44	2.92	1.51
0806	0	1	48	24.4	1	0	96	64	1	0	0	0	0	0	0	1	0	0	101.972	99.3237	1	1	0	0	0	1	0	1	1	0	1	100	1	0	4	1	1	1	1	8.53	121	213	6.43	1.54	138.312	1.26	9.03	6.55	1.24
0807	0	1	70	29.8	1	0	149	102	0	1	0	1	0	0	0	0	0	0	67.9798	101.026	1	1	0	0	0	1	0	0	1	1	1	95	1	0	3	1	1	0	1	12.12	148	161	9.6	1.11	145.045	1.24	4.47	2.53	0.98
0808	0	1	53	23.2	1	0	118	74	0	0	0	0	0	0	0	1	0	0	101.799	111.342	1	1	0	1	0	1	0	1	1	0	1	100	0	0	2	1	1	0	1	7.59	164	222	5.05	1.72	129.07	1.28	4.25	2.28	1.25
0809	0	2	66	22.9	1	0	120	80	1	1	0	1	0	0	0	0	0	1	44.9917	69.3314	1	1	0	1	0	1	0	1	1	1	1	75	0	0	3	0	1	0	1	7.38	126	151	5.67	1.15	131.304	2.55	6.03	NA	0.2
0810	0	1	83	20.4	1	0	120	80	1	1	0	0	0	0	0	0	1	1	57.6218	59.1381	1	1	0	0	0	1	0	1	1	0	1	75	0	1	3	1	1	1	1	6.39	130	200	4.49	1.04	192.308	0.61	3.08	1.46	1.22
0811	0	1	46	23.4	1	0	116	80	0	0	0	0	0	0	0	1	0	0	85.1218	101.395	1	1	0	0	0	1	0	1	0	0	1	95	1	0	1	1	0	0	1	6.73	124	530	4.11	2.04	259.804	0.9	4.05	2.27	1.29
0812	0	1	63	26.6	1	0	141	72	0	1	0	1	0	0	0	0	1	1	54.0908	51.0434	1	1	0	1	0	1	0	1	0	0	1	75	0	0	1	0	0	0	1	10.22	163	237	7.5	1.79	132.402	2.38	6.16	2.96	1.23
0813	0	1	69	30.1	1	0	174	104	0	0	0	1	0	0	0	0	0	0	107.291	104.391	1	1	0	0	1	1	1	1	0	0	1	95	0	0	3	1	1	0	1	7.68	142	190	5.1	1.97	96.4467	2.53	5.61	3	1.09
0814	0	1	66	23	0	1	138	80	0	0	0	0	0	0	0	0	0	0	80.4129	86.4139	1	1	0	1	0	1	0	1	0	0	1	95	0	0	2	1	1	0	1	5.73	143	234	3.09	1.87	125.134	0.77	3.67	2.03	0.97
0815	0	1	80	19.4	0	1	120	80	0	0	0	1	0	0	0	1	0	1	31.6998	33.7544	1	1	0	0	1	1	0	1	0	1	1	60	0	0	2	0	1	0	1	6.84	124	161	4.72	1.41	114.184	1.04	4.07	2.41	0.83
0817	0	1	61	26.1	1	0	149	72	1	0	0	1	0	0	0	1	0	0	108.054	114.704	1	1	0	1	0	1	0	1	0	0	0	100	0	0	1	0	0	0	1	8.63	149	225	6.12	1.86	120.968	1.31	5.11	3.04	1
0819	0	1	53	25.4	1	0	114	68	1	0	0	1	0	0	0	1	0	0	99.7097	100.972	1	0	1	0	0	1	0	1	1	1	1	95	1	0	3	0	1	0	1	12.08	153	236	9.73	1.64	143.902	1.93	5.79	3.16	1.26
0820	0	1	61	26.1	1	0	130	90	1	0	0	1	0	0	0	1	0	0	83.6216	107.14	1	1	0	1	0	1	0	1	0	1	0	95	1	0	1	0	0	0	1	4.95	164	169	2.94	1.37	123.358	1.09	3.66	1.65	1.02
0821	0	1	64	27	1	0	160	80	0	1	0	0	1	0	0	1	0	0	97.757	93.6838	1	1	0	1	0	1	0	1	1	0	0	75	0	0	3	0	1	0	1	7.94	133	229	4.22	2.81	81.4947	1.2	2.64	1.19	0.67
0822	0	1	53	24.6	1	0	122	76	1	0	0	0	0	0	0	1	0	0	98.5366	81.7133	1	0	1	1	0	1	0	1	1	0	1	95	1	0	4	1	1	1	1	9.58	138	277	6.29	2.68	103.358	5.43	6.74	2.55	1.16
0823	0	1	74	24.2	1	0	167	80	1	1	0	1	0	0	1	0	0	0	62.6492	73.9609	1	0	0	0	0	0	0	1	0	1	1	85	1	0	3	1	1	0	1	7.58	139	150	5.03	1.61	93.1677	1.03	4.91	2.84	1.16
0824	0	2	69	20	1	0	168	64	1	1	0	1	0	0	0	0	0	1	36.8888	47.2933	1	1	0	0	0	0	1	1	0	0	0	75	1	0	1	1	0	0	1	5.18	95	214	3.64	0.82	260.976	1.19	5.33	2.37	1.83
0825	0	1	57	24.8	1	0	165	84	0	1	0	0	0	0	0	1	0	0	89.9075	112.741	1	1	0	1	0	1	0	1	0	1	1	95	1	0	3	1	1	0	1	13.36	156	223	10.59	2.01	110.945	4.7	6.36	2.65	1.12
0826	0	2	59	23.6	1	0	178	100	0	0	0	1	0	0	0	0	0	1	49.7613	75.4713	1	0	1	1	0	0	1	1	0	1	1	75	1	0	2	0	1	0	1	6.94	143	231	3.59	2.75	84	1.17	5.51	3.01	1.06
0827	0	1	73	27.9	0	1	165	94	1	1	0	1	0	0	0	0	0	1	58.177	62.2494	1	1	0	1	0	1	1	1	0	1	0	75	0	0	3	1	1	0	1	6.23	143	139	4.28	1.41	98.5816	1.66	3.93	2.08	0.89
0828	0	2	74	21.8	1	0	151	64	0	1	0	1	1	0	0	0	0	1	50.4341	57.5125	1	1	0	1	0	1	1	1	1	1	1	75	0	0	3	0	1	0	1	7.72	126	146	5.63	1.52	96.0526	0.68	2.13	0.64	0.97
0829	0	1	74	20.5	1	0	148	62	0	0	0	1	0	0	0	0	0	1	42.8414	56.9538	1	0	1	1	0	0	0	1	1	1	1	75	0	0	3	1	1	0	1	11.97	131	227	9.19	1.27	178.74	0.87	6.05	3.35	1.34
0830	0	1	66	24.8	1	0	118	68	0	1	0	1	1	0	0	0	1	0	66.5352	76.3923	1	1	0	1	0	1	0	1	0	0	1	90	0	0	3	0	1	0	1	5.23	146	205	3.28	1.43	143.357	1.22	3.13	1.51	0.9
0831	0	1	75	22.3	1	0	108	72	1	0	0	0	1	0	1	0	1	1	41.4585	59.5966	1	1	0	0	0	0	0	1	0	1	1	75	0	0	3	1	1	0	1	4.46	134	184	2.19	1.84	100	1.32	3.94	2.01	1.2
0832	0	1	64	21.6	1	0	140	79	1	0	0	1	0	0	0	0	0	1	43.0885	55.0575	1	1	0	1	0	0	0	1	0	0	1	75	0	0	3	1	1	0	1	5	131	262	3.56	1.02	256.863	0.75	4.29	NA	1.59
0833	0	1	61	NA	1	0	147	86	0	0	0	1	0	0	0	0	0	0	NA	NA	1	1	0	1	0	0	0	1	1	0	1	90	1	0	3	0	1	0	1	7.63	151	156	6.81	0.56	278.571	3.48	4.97	2.02	1.09
0834	0	1	68	20.2	1	0	136	74	0	0	0	0	0	0	0	1	0	1	45.2437	56.9538	1	0	1	0	0	0	0	1	1	0	1	90	1	0	2	0	1	0	1	8.01	117	196	7.05	0.75	261.333	0.79	3.5	1.8	0.94
0835	0	1	71	25.7	1	0	140	84	1	0	0	1	0	0	1	1	0	0	74.7423	76.6837	1	0	1	1	0	1	1	1	1	1	1	90	1	0	4	1	1	1	1	5.44	91	161	3.25	1.61	100	1.6	4.31	2.37	1.1
0836	0	1	52	27.8	1	0	152	81	1	1	0	1	0	0	0	0	0	0	142.336	118.613	1	1	0	1	0	0	1	1	1	0	1	100	1	0	1	0	0	0	1	12.58	138	191	11.48	0.6	318.333	1.72	6.37	3.57	1.39
0837	1	1	53	24.8	1	0	100	69	0	0	0	1	0	0	0	1	0	0	101.986	80.9238	1	0	1	0	0	1	0	1	1	0	1	95	1	0	1	0	0	0	0	11.61	137	215	10.18	1	215	3.59	4.32	2.09	1
0839	0	1	57	24.7	1	0	121	80	0	0	0	0	0	0	0	0	0	0	63.5562	81.4594	1	1	0	1	0	1	0	1	0	0	1	85	0	0	3	1	1	0	1	6.58	152	115	4.85	1.26	91.2698	3.01	4.14	1.83	0.97
0840	0	2	65	25.1	0	1	135	75	0	1	0	1	0	0	0	0	0	1	58.7103	61.1565	1	1	0	1	0	0	0	1	0	1	1	80	0	0	2	1	1	0	1	5.74	121	262	3.41	1.84	142.391	3.23	3.04	NA	0.94
0841	0	2	66	20.8	0	1	108	63	0	0	0	0	1	0	0	0	1	0	71.4024	67.283	1	0	1	0	0	1	0	1	0	0	1	95	0	0	2	1	1	0	1	5.11	111	239	2.67	1.79	133.52	1.72	3.37	1.36	1.15
0842	0	1	63	24.9	1	0	131	83	1	1	0	0	0	0	1	1	0	0	114.873	95.4578	1	0	1	1	0	1	0	1	0	1	1	100	0	0	3	1	1	0	1	9.5	179	192	7.48	1.29	148.837	1.79	4.87	2.27	1.29
0843	0	1	69	27.9	1	0	140	90	0	0	0	1	0	0	0	1	0	0	79.4193	73.8784	1	1	0	1	0	0	0	1	0	1	1	95	0	0	3	1	1	0	1	7.3	144	195	5.82	0.91	214.286	1.06	3.61	1.9	0.71
0844	0	1	47	23.6	1	0	100	68	0	1	0	0	0	0	1	1	0	0	97.8279	91.4479	1	0	1	0	0	0	0	1	0	0	1	95	1	0	3	1	1	0	1	9.86	129	318	6.79	2.19	145.205	1.62	3.59	1.9	0.72
0845	0	1	71	24.1	1	0	148	73	1	0	0	0	0	0	0	0	1	0	60.4003	59.6637	1	1	0	1	0	1	0	1	0	1	0	85	0	0	1	0	0	0	1	4.7	119	191	2.85	1.39	137.41	4.39	4.53	2.04	0.64
0846	0	2	70	20.4	1	0	113	49	0	1	0	0	0	0	1	0	0	1	57.4868	72.7384	1	0	1	1	0	1	0	1	0	0	1	75	1	0	3	1	1	0	1	5.73	108	162	3.38	1.58	102.532	1.69	5.13	2.89	1.02
0847	0	1	75	23.3	0	1	140	70	0	0	0	1	0	0	0	1	0	1	42.5466	45.0285	1	1	0	1	0	1	0	1	0	0	0	75	1	0	2	0	1	0	1	5.58	125	135	2.32	2.7	50	1.23	3.73	1.68	1.24
0848	0	1	75	29.6	1	0	168	86	0	0	0	1	0	0	1	0	0	1	54.2212	69.8303	1	1	0	1	0	1	1	1	0	1	1	75	0	0	3	1	1	0	1	8.25	151	195	5.91	1.39	140.288	0.51	3.88	1.89	1.13
0849	0	2	73	21.2	1	0	97	60	0	1	0	1	0	0	0	0	0	1	49.3149	86.6018	1	0	1	1	0	1	0	1	1	1	1	75	1	0	2	0	1	0	1	10.61	108	243	10.98	0.43	565.116	1.17	4.72	2.14	1.46
0850	0	1	67	26.6	1	0	116	60	1	0	0	0	0	0	0	1	0	0	77.9524	122.076	1	0	1	1	0	1	0	1	1	0	1	95	0	0	3	0	1	0	1	8.59	137	207	5.16	2.52	82.1429	1.63	4.68	2.7	1.05
0851	0	1	70	25.2	1	0	120	63	1	0	0	1	0	0	0	0	1	1	47.8409	56.2574	1	1	0	1	0	1	0	1	0	0	0	75	0	0	1	0	0	0	1	7.57	162	220	5.57	1.13	194.69	1.35	5.19	2.7	1.35
0852	0	2	72	26	1	0	156	80	0	0	0	1	0	0	0	0	0	1	58.8835	71.3396	1	0	1	1	0	1	1	1	0	1	1	75	0	0	3	0	1	0	1	10.49	128	182	7.46	2.19	83.105	2.65	6.8	3.41	1.33
0853	0	1	71	25.2	1	0	146	80	1	0	0	0	0	0	0	0	0	0	NA	79.8864	1	1	0	1	0	0	0	1	0	0	0	90	0	0	3	1	1	0	1	2.95	117	150	1.65	0.94	159.574	NA	NA	NA	NA
0854	0	1	84	21.6	1	0	140	53	0	0	0	1	0	0	0	0	1	0	74.2613	68.4597	1	0	1	1	0	1	0	1	0	0	1	90	1	0	2	0	1	0	1	8.22	112	201	6.94	0.68	295.588	1.24	4.36	2.39	0.96
0855	0	1	58	23	1	0	130	70	1	0	0	0	0	0	0	1	0	0	67.1741	90.4985	1	1	0	1	0	1	0	1	0	0	0	90	1	0	3	1	1	0	1	7.09	146	308	4.41	1.37	224.818	0.87	5.51	3.66	1.13
0856	0	1	64	24.8	1	0	116	92	0	1	0	0	1	0	0	0	1	0	78.2946	67.6526	1	0	1	1	0	1	0	1	1	1	1	100	1	0	3	0	1	0	1	8.43	134	179	7.09	0.91	196.703	1.68	3.96	2.26	1.16
0857	0	2	68	25.2	1	0	160	78	1	0	0	1	0	0	0	0	0	0	61.1676	52.0277	1	0	1	1	0	1	1	1	0	1	1	85	0	0	4	1	1	1	1	7.39	121	284	5.01	1.99	142.714	1.67	4.98	3.32	1.16
0858	0	1	60	26	1	0	112	69	0	1	0	1	0	0	0	0	1	0	70.577	75.2304	1	0	1	0	0	1	0	1	1	1	1	90	1	0	3	1	1	1	1	10.02	133	257	8.88	0.7	367.143	0.62	2.55	1.27	0.73
0859	0	2	78	NA	1	0	129	64	0	1	0	1	0	0	0	0	0	0	NA	NA	1	1	0	1	0	0	1	1	0	1	1	90	1	0	2	0	1	0	1	3.2	119	109	1.81	1.01	107.921	2.98	4.39	2.51	0.9
0860	0	1	53	26.6	1	0	153	90	0	0	0	1	0	0	0	1	0	0	96.4303	82.1849	1	0	1	1	0	1	0	1	0	1	1	95	0	0	3	1	1	0	1	8.25	130	216	6.26	1.68	128.571	1.24	4.52	2.09	1.29
0861	0	2	67	25.8	0	1	122	78	0	0	0	1	0	0	0	0	0	1	59.5745	76.3298	1	1	0	1	0	1	1	1	0	0	1	90	0	0	3	1	1	0	1	9.12	148	270	5.41	3.13	86.262	5.47	11.85	4.95	1.38
0862	0	2	75	22.2	1	0	122	62	1	0	0	1	0	0	0	0	0	1	51.1688	50.4051	1	1	0	1	0	1	1	1	0	1	0	75	0	0	2	1	1	0	1	5.83	115	198	3.3	1.72	115.116	0.78	5.54	2.85	1.35
0863	0	2	62	19.8	1	0	164	98	0	0	0	1	0	0	0	0	0	1	48.1242	45.2934	1	0	1	1	0	1	1	1	0	1	1	75	0	0	1	1	0	0	1	7.95	134	269	6.14	1.33	202.256	1.19	4.49	2.62	1.21
0864	0	1	66	25.2	1	0	110	70	0	1	0	1	0	0	0	0	1	0	65.7924	63.8573	1	0	1	1	0	1	0	1	0	0	0	90	0	0	1	0	0	0	1	9.07	144	250	5.89	2.53	98.8142	2.7	3.54	2.01	0.87
0865	0	1	50	26.9	0	1	105	65	0	0	0	0	1	0	0	0	1	0	101.974	122.969	1	1	0	1	0	1	0	1	1	0	1	100	0	0	3	1	1	0	1	9.07	150	218	7.16	1.15	189.565	2.69	2.83	1.17	0.73
0866	0	1	55	21.6	1	0	116	80	1	0	0	1	0	0	0	0	0	0	65.1997	70.0039	1	0	1	1	0	1	0	1	1	0	1	90	1	0	1	1	0	0	1	6.53	122	209	5.29	0.77	271.429	1.24	4.63	2.41	1.11
0868	0	1	69	23	1	0	90	60	1	1	0	0	0	1	1	0	1	0	68.8026	108.496	1	1	0	1	0	1	0	1	1	1	1	100	0	0	3	1	1	0	1	5.4	116	356	3.92	1.06	335.849	1.06	2.51	1.19	0.72
0869	0	1	56	28.7	1	0	107	84	0	0	0	0	0	0	0	1	0	0	98.3197	105.023	1	0	1	1	0	0	0	1	0	0	1	95	0	0	2	1	1	0	1	12.52	167	185	10.45	1.29	143.411	0.33	4.08	NA	1.26
0871	0	1	52	26	0	1	128	72	0	1	0	0	1	0	0	0	1	0	120.425	120.425	1	1	0	1	0	1	0	1	0	1	1	100	0	0	2	1	1	0	1	5.37	111	175	3.86	0.96	182.292	0.43	3.27	1.84	0.93
0872	0	1	57	21.9	1	0	108	60	0	0	0	0	1	0	0	0	0	1	56.8446	60.2689	1	1	0	1	0	1	0	1	0	1	1	75	0	0	3	1	1	0	1	7.03	128	150	4.07	2.28	65.7895	1.46	2.54	1.08	0.78
0873	0	1	36	35	1	0	130	100	0	0	0	1	0	0	0	1	0	0	163.919	178.821	1	1	0	1	0	0	0	1	1	0	0	100	0	0	2	0	1	0	0	8.46	154	231	5.79	1.85	124.865	2.14	3.93	2.12	0.9
0874	0	1	78	24	1	0	120	80	0	0	0	1	0	0	0	1	0	1	44.977	57.6466	1	1	0	1	0	1	0	1	0	0	0	75	0	0	3	1	1	0	1	5.61	114	160	4.66	0.35	457.143	0.93	2.98	1.38	0.81
0875	0	1	73	27.4	1	0	138	86	0	0	0	1	0	0	0	1	0	0	60.1153	75.3169	1	1	0	1	0	1	1	1	0	1	1	85	0	0	1	0	0	0	0	4.64	104	89	2.71	1.18	75.4237	0.92	2.3	1.02	0.79
0876	0	1	64	25.7	1	0	124	58	0	1	0	1	0	0	0	1	0	0	64.7687	85.2651	1	0	1	1	0	1	1	1	0	0	1	90	0	0	3	1	1	0	1	13.98	144	300	10.59	2.41	124.481	3.26	5.85	2.72	1.26
0877	0	1	67	28.9	1	0	129	69	0	1	0	1	0	0	0	0	0	0	76.0586	91.687	1	0	1	0	0	1	1	1	1	1	1	95	1	0	1	0	0	0	1	9.37	144	141	7.48	1.16	121.552	2.16	4.25	1.56	1.56
0879	0	2	68	31.4	1	0	110	70	0	0	0	0	0	0	0	0	0	0	90.9867	98.968	1	0	1	1	0	1	0	1	0	1	0	95	0	0	3	1	1	0	1	6.77	129	226	3.78	2.38	94.958	1.4	3.91	1.93	0.95
0880	0	2	69	24.4	1	0	84	62	1	1	0	0	0	0	1	0	0	0	64.4089	88.2122	1	1	0	0	0	1	0	1	1	1	1	75	0	0	1	0	0	0	1	6.12	100	207	4.67	1.14	181.579	1.04	4.77	2.43	1.35
0881	0	1	50	25.1	1	0	133	78	0	1	0	1	0	0	1	0	0	0	88.9559	87.1027	1	0	1	1	0	1	0	1	0	0	1	95	0	0	2	0	1	0	1	11.27	147	186	9.05	1.57	118.471	3.63	4.33	1.52	1.18
0882	0	1	77	23.1	1	0	122	72	1	0	0	1	0	0	0	1	0	1	48.9431	66.9369	1	1	0	0	1	1	0	1	0	1	1	75	0	0	2	0	1	0	0	5.98	143	108	4.01	1.11	97.2973	1.08	3.79	1.88	1.06
0883	0	2	69	23.9	1	0	143	78	0	0	0	1	0	0	0	0	0	0	77.5289	70.3724	1	1	0	1	0	1	1	1	0	1	1	95	0	0	1	0	0	0	0	8.38	130	135	7.17	0.78	173.077	0.82	9.28	2.91	1.72
0884	0	2	54	29.2	1	0	148	67	1	1	0	1	0	0	1	0	0	0	104.684	137.398	1	1	0	1	0	0	1	1	0	0	0	95	0	0	2	0	1	0	1	7.42	134	177	3.83	3.16	56.0127	1.61	4.54	2.1	1.36
0885	0	2	66	32.3	1	0	130	70	1	1	0	1	0	0	1	0	0	1	56.2242	74.6979	1	1	0	0	1	1	1	1	0	1	0	75	0	0	3	1	1	0	1	7.38	134	212	4.3	2.52	84.127	1.38	4.95	2.38	1.48
0886	0	2	78	22.8	1	0	136	69	0	0	0	0	0	0	0	0	0	0	71.9168	60.6357	1	1	0	1	0	0	0	1	0	0	1	90	0	0	3	0	1	0	1	10.42	104	226	8.23	1.5	150.667	1.27	4.68	2.05	1.54
0887	0	1	62	26	0	1	140	90	0	1	0	1	0	0	1	0	0	0	78.5889	75.2799	1	1	0	0	1	1	0	1	0	0	1	95	1	0	2	0	1	0	1	7.29	150	152	5.07	1.61	94.4099	2.47	0.39	1.7	0.94
0889	0	1	56	25.1	1	0	150	70	1	1	0	1	0	0	1	0	0	0	78.3683	87.5881	1	1	0	0	1	1	0	1	1	0	1	95	0	0	4	1	1	1	1	7.1	147	233	5.32	1.29	180.62	3.02	4.08	1.51	0.9
0890	0	1	76	22	1	0	116	62	1	1	0	1	1	0	0	0	0	1	38.2374	37.121	1	1	0	0	1	1	0	1	0	1	1	75	1	0	3	0	1	0	0	5	104	141	2.87	1.56	90.3846	0.48	2.9	0.93	1.19
0891	0	1	50	21.6	0	1	154	74	0	1	0	1	0	0	0	0	0	0	95.289	95.289	1	1	0	1	0	1	0	1	0	0	1	95	0	0	1	1	0	0	1	7.43	89	369	4.82	1.88	196.277	1.47	3.44	1.52	0.98
0892	0	1	73	23.9	1	0	103	68	0	1	0	1	0	0	0	0	1	1	34.2521	65.7162	1	1	0	0	1	1	0	1	1	1	1	70	0	0	3	1	1	0	1	11.87	164	289	10.04	0.96	301.042	1.14	4.12	2.79	0.71
0894	0	2	76	20.4	0	1	118	82	1	0	0	1	0	0	0	0	0	1	48.4527	54.7046	1	0	1	0	0	0	0	1	0	1	0	75	1	0	3	0	1	0	1	7.03	144	183	4.1	2.31	79.2208	1.9	3.36	1.18	0.98
0895	1	1	61	26.7	1	0	121	74	0	0	0	1	1	0	0	1	0	0	102.43	68.2868	1	1	0	1	0	1	0	0	0	1	1	100	0	0	3	0	1	0	1	7.34	152	199	4.56	1.52	130.921	NA	NA	NA	NA
0896	0	1	57	21.4	1	0	107	63	1	0	0	1	0	0	1	1	0	1	52.8474	68.5588	1	1	0	1	0	0	1	1	0	1	0	75	0	0	2	1	1	0	1	8.76	146	220	6.14	1.95	112.821	1.92	4.43	2.24	1.25
0897	0	1	59	28	1	0	113	79	0	0	0	1	1	1	0	0	1	0	71.4592	74.5327	1	0	1	1	0	1	0	1	0	0	1	90	1	0	3	0	1	0	1	11.88	165	137	8.34	2.52	54.3651	1.12	3.3	1.78	0.89
0898	0	1	66	20.6	0	1	190	98	1	0	0	1	0	0	0	0	1	1	55.7408	68.1276	1	1	0	0	0	1	1	1	0	0	0	75	1	0	3	0	1	0	1	8.74	137	324	4.69	3.04	106.579	2.19	3.22	1.16	0.96
0899	0	1	60	28.9	1	0	142	88	1	1	0	1	0	0	0	0	1	0	96.4955	118.642	1	1	0	1	0	1	0	1	0	0	0	95	0	0	1	0	0	0	1	6.45	158	254	3.68	2.15	118.14	1.77	4.53	2.32	1.08
0900	0	1	53	32.6	1	0	158	96	1	1	0	1	0	0	0	1	0	0	126.461	109.156	1	0	1	1	0	1	1	1	0	0	1	100	0	0	2	0	1	0	1	7.26	162	250	4.17	2.34	106.838	2.78	3.73	1.84	0.79
0902	0	1	61	27.7	1	0	140	110	0	1	0	1	0	0	0	1	0	0	66.3284	62.7751	1	1	0	1	0	1	1	1	1	0	1	100	0	0	3	1	1	0	1	3.73	108	178	2.25	0.96	185.417	1.92	3.73	2.01	0.88
0903	0	1	58	28.9	1	0	166	84	1	1	0	1	1	0	0	1	0	0	90.4645	88.3106	1	1	0	1	0	1	1	1	0	1	1	95	0	0	3	1	1	0	1	10.45	154	255	7.9	1.94	131.443	1.33	4.47	3.07	1.09
0904	0	2	67	26.5	1	0	124	68	1	1	0	1	0	0	1	0	0	0	70.004	70.004	1	1	0	1	0	1	0	1	0	1	1	90	0	0	2	0	1	0	1	7.61	122	234	5.56	1.69	138.462	1.16	4.61	2.1	1.73
0905	0	2	65	19.5	1	0	172	94	0	1	0	1	0	0	0	0	0	1	48.1074	49.9577	1	0	1	1	0	1	0	1	1	0	1	75	1	0	2	0	1	0	1	8.61	140	178	7.04	1.17	152.137	1.47	5.59	3.2	1.3
0907	0	2	63	20	1	0	122	72	0	1	0	0	0	0	0	1	0	0	63.5018	60.6153	1	0	1	1	0	0	0	1	0	0	1	85	1	0	2	0	1	0	1	10.44	115	204	8.66	1.02	200	2.01	4.86	2.46	1.2
0908	0	1	67	26.4	1	0	154	92	0	1	0	1	0	0	0	1	0	0	110.158	135.579	1	1	0	1	0	1	1	1	1	1	1	100	1	0	4	1	1	1	1	7.83	145	222	5.44	1.99	111.558	0.76	4.62	3.5	1.34
0909	0	1	63	24.8	1	0	150	90	1	0	0	1	0	0	0	1	0	0	89.0438	99.837	1	1	0	0	1	1	1	1	0	1	1	95	1	0	2	0	1	0	0	9.16	136	190	6.73	1.74	109.195	2.22	5.32	2.63	1.38
0910	0	2	59	23.6	1	0	138	88	1	0	0	1	0	0	1	0	0	0	74.4569	87.9946	1	1	0	0	0	0	1	1	0	1	1	90	1	0	1	1	0	0	1	6.13	125	140	3.84	1.82	76.9231	2.21	6.62	3.18	1.83
0911	0	1	54	28.7	1	0	135	87	0	1	0	0	0	0	0	1	0	0	125.577	141.274	1	0	1	1	0	1	0	1	1	1	1	100	1	0	3	1	1	0	1	10.62	127	158	8.9	1.21	130.579	1.51	4.13	NA	0.96
0912	0	1	74	30.8	1	0	130	90	1	0	0	1	0	0	1	0	0	0	92.9405	91.7787	1	1	0	1	0	1	0	1	1	0	1	95	0	0	3	1	1	0	1	5.91	147	142	3.86	1.47	96.5986	2.1	3.38	1.32	1.14
0913	0	2	59	27.2	1	0	152	83	0	0	0	1	0	0	0	0	0	0	63.5474	59.8093	1	1	0	1	0	1	0	1	0	1	1	85	0	0	3	1	1	0	1	7.21	125	204	4.32	2.24	91.0714	1.86	4.73	2.76	1.2
0914	0	2	82	24	1	0	135	65	1	1	0	1	1	0	1	0	0	1	31.1736	38.4695	1	1	0	0	1	1	0	1	0	1	1	70	1	0	4	1	1	1	1	5.43	102	160	3.47	1.26	126.984	2.71	5.01	2.44	1.16
0915	0	2	66	24	1	0	138	78	0	0	0	1	0	0	0	0	0	0	75.5691	82.6983	1	1	0	1	0	1	1	1	0	1	1	95	0	0	2	1	1	0	1	5.44	150	144	NA	NA	#VALUE!	3.23	4.01	1.76	1.07
0916	0	1	59	24.4	1	0	144	96	0	0	0	1	0	0	0	0	0	0	107.95	98.283	1	1	0	0	1	1	0	1	1	0	0	100	0	0	3	1	1	0	1	5.47	140	238	3.4	1.82	130.769	1.13	4.7	2.64	1.34
0917	0	1	61	19.8	0	1	107	87	0	0	0	0	1	0	0	0	1	0	70.2378	71.162	1	1	0	1	0	1	0	1	0	0	0	90	0	0	3	1	1	0	1	6.89	149	154	3.8	2.32	66.3793	0.74	3.63	1.64	1.46
0918	0	1	55	26.6	0	1	200	118	1	0	0	1	0	0	1	0	0	0	91.687	96.2148	1	0	1	1	0	1	1	1	1	0	0	95	1	0	3	1	1	0	1	8.42	161	186	4.93	2.66	69.9248	1.64	5.01	3.67	1.06
0919	0	1	69	27	1	0	158	90	1	1	0	1	0	0	0	1	0	0	74.6641	90.1788	1	1	0	1	0	0	1	1	0	1	1	90	1	0	3	1	1	0	1	7.97	144	185	4.98	2.24	82.5893	2.03	4.95	2.35	1.11
0920	0	1	64	27.8	0	1	142	80	1	0	0	1	0	0	0	0	1	0	86.9538	88.0831	1	1	0	0	1	1	1	1	0	0	1	95	0	0	3	1	1	0	1	7.89	144	304	6	1.31	232.061	0.61	5.06	3.29	1.59
0921	0	1	76	21.3	1	0	118	88	1	0	0	1	0	0	0	0	0	1	42.2917	43.0677	1	0	1	1	0	1	0	1	0	1	1	75	0	0	3	1	1	0	1	6.74	139	205	5.21	0.94	218.085	1.07	4.71	2.38	1.26
0922	0	1	45	25.6	1	0	115	71	0	0	0	1	0	0	0	1	0	0	89.2421	86.5102	1	1	0	1	0	1	0	1	0	0	1	95	1	0	3	1	1	0	1	6.76	124	235	4.97	1.08	217.593	1.43	4.77	2.83	1.29
0923	0	1	54	23.4	1	0	112	68	0	0	0	1	0	0	0	1	0	0	80.8727	70.8772	1	0	1	1	0	1	0	1	0	0	1	95	0	0	3	1	1	0	1	10.23	140	288	8.14	1.24	232.258	2.02	4.52	2.25	1.25
0924	0	2	68	22.2	1	0	200	90	1	1	0	1	0	0	0	0	0	0	85.0189	79.5922	1	0	1	1	0	0	1	1	0	1	1	95	0	0	3	1	1	0	1	6.52	108	252	4.91	1.03	244.66	0.82	5.13	3.03	1.39
0925	0	1	57	24.9	1	0	165	106	0	1	0	1	0	0	0	1	0	1	47.8734	42.2079	1	1	0	1	0	1	1	1	0	0	1	75	0	0	2	1	1	0	1	6.11	144	137	4.01	1.63	84.0491	3.71	3.76	1.89	0.83
0926	0	1	66	26.4	0	1	138	90	1	0	0	0	0	0	0	1	0	0	82.146	90.4645	1	0	1	1	0	1	0	1	1	0	1	95	1	0	3	1	1	0	1	7.32	147	120	3.54	3.1	38.7097	2.77	4.38	2.26	1.14
0927	0	1	70	23.2	0	1	113	70	0	0	0	0	1	0	0	0	1	1	53.5967	48.9585	1	1	0	1	0	1	0	1	0	1	1	75	1	0	3	1	1	0	1	5.55	126	181	3.28	1.58	114.557	0.82	4.25	2.07	1.54
0928	0	2	65	23.3	0	1	120	70	0	0	0	1	0	0	1	0	0	1	56.9965	58.7502	1	1	0	1	0	1	1	1	0	1	1	75	0	0	3	1	1	0	1	5.34	131	177	3.61	1.3	136.154	1.73	5.48	3.5	1.38
0929	0	1	77	NA	1	0	107	61	0	0	0	1	0	0	0	1	0	0	NA	NA	1	1	0	0	0	1	0	1	0	0	1	90	0	0	3	0	1	0	1	7.64	105	236	6.4	1.02	231.373	0.4	4.26	2.21	1.68
0930	0	1	62	26	1	0	140	90	0	0	0	0	1	0	0	1	0	0	60.482	75.6025	1	1	0	0	0	0	0	1	1	1	1	75	0	0	2	0	1	0	1	7.4	128	198	4.06	2.58	76.7442	1.33	3.71	1.45	1.5
0931	0	1	68	25.7	1	0	160	80	1	1	0	1	0	0	0	1	0	1	55.0122	51.8814	1	1	0	1	0	0	0	1	0	0	1	75	1	0	2	1	1	0	0	8.05	142	246	5.19	1.9	129.474	1.1	3.21	1.71	1.21
0932	0	1	55	26	1	0	130	78	0	1	0	1	0	0	0	0	1	0	88.828	118.014	1	1	0	1	0	0	1	1	0	0	0	95	0	0	3	0	1	0	1	4.66	126	145	3.64	0.77	188.312	1.42	5.68	3.44	1.31
0933	1	2	63	28.1	0	1	139	86	0	0	0	1	1	0	0	0	0	1	59.009	38.3798	1	0	1	1	0	0	0	1	0	1	1	80	1	0	3	1	1	0	1	5.91	114	208	3.48	1.7	122.353	1.35	4.06	2.01	1.12
0935	0	2	68	30.2	1	0	130	55	0	1	0	0	0	0	0	0	0	0	80.7545	69.6922	1	1	0	1	0	1	0	1	1	0	1	95	0	0	2	1	1	0	1	6.94	125	223	4.45	1.72	129.651	1.82	5.26	2.91	1.25
0936	0	2	59	26.8	1	0	148	70	0	1	0	1	1	0	0	0	0	1	49.1605	67.7455	1	1	0	0	1	1	1	1	0	0	0	75	0	0	2	1	1	0	1	4.94	125	190	3.01	1.22	155.738	0.87	4.11	1.62	1.48
0937	0	1	75	24.9	1	0	150	90	1	0	0	1	0	0	0	1	0	0	67.3091	76.2836	1	0	1	0	1	0	1	1	1	0	1	90	1	0	2	0	1	0	1	5.42	133	214	3.39	1.63	131.288	2.38	3.69	1.77	1.2
0938	0	1	68	25.4	1	0	149	89	1	0	0	0	1	0	0	0	0	0	80.5813	84.1363	1	1	0	1	0	1	0	1	1	0	0	95	0	0	1	0	0	0	1	9.62	138	296	6.16	2.41	122.822	1.77	5.37	3.04	1.17
0939	0	2	71	26.7	1	0	160	80	1	0	0	1	0	0	0	0	0	0	60.4693	74.9097	1	1	0	0	1	1	0	1	0	1	0	85	0	0	2	0	1	0	1	8.1	111	187	4.96	2.45	76.3265	0.89	3.81	2.2	1.41
0940	0	1	71	23.6	1	0	120	66	0	0	0	1	0	0	0	0	0	0	63.0271	57.2389	1	1	0	1	0	0	0	1	0	0	1	85	0	0	1	0	0	0	1	5.07	145	243	3.06	1.14	213.158	1.46	3.13	1.59	0.97
0943	0	1	49	27.7	1	0	112	69	0	0	0	0	0	0	0	1	0	0	105.949	103.486	1	1	0	1	0	1	0	1	0	0	1	100	0	0	1	1	0	0	1	10.34	150	202	7.52	2.24	90.1786	3.2	3.7	1.73	0.82
0944	0	1	63	23.8	1	0	145	89	0	0	0	1	1	0	0	0	0	0	79.2691	102.109	1	1	0	1	0	1	1	1	1	1	1	95	0	0	3	1	1	0	1	6.42	157	165	4.82	1.01	163.366	2.25	3.52	1.57	0.94
0945	0	2	69	27.7	1	0	145	70	0	1	0	1	0	0	0	0	0	0	108.654	111.181	1	1	0	1	0	1	1	1	1	1	1	100	0	0	2	1	1	0	1	6.66	110	218	4.37	1.83	119.126	1.2	4.45	2.68	1.14
0946	0	1	55	25.4	1	0	160	100	1	0	0	1	0	0	0	1	0	0	96.3087	136.161	1	1	0	0	1	1	0	1	0	0	1	95	0	0	1	0	0	0	1	9.79	160	279	5.7	3.2	87.1875	0.41	3.09	1.16	1.34
0947	0	1	60	24.3	1	0	126	70	0	1	0	1	0	0	0	1	0	0	103.552	110.024	1	0	1	1	0	0	0	1	1	0	1	95	0	0	3	1	1	0	1	7.85	140	183	6.16	1.28	142.969	1.26	4.62	2.55	1.46
0948	0	1	63	22.9	1	0	138	64	0	0	0	1	0	0	0	1	0	0	68.0473	75.3056	1	1	0	0	0	0	1	1	0	0	0	90	0	0	2	0	1	0	0	7.5	140	208	4.79	2.24	92.8571	1.1	4.52	2.91	1.19
0949	0	1	54	29.4	1	0	125	75	0	1	0	1	0	0	0	1	0	0	105.134	110.668	1	1	0	1	0	1	0	1	1	0	1	95	0	0	1	1	0	0	1	7.01	153	200	4.02	2.37	84.3882	2.27	5.46	3.15	1.18
0950	0	1	53	21.3	1	0	110	80	1	1	0	1	0	0	0	0	0	0	77.8222	82.8756	1	0	1	1	0	1	0	1	1	0	1	95	0	0	3	1	1	0	1	7.93	151	164	6.69	0.93	176.344	1.24	3.04	1.65	1.1
0951	0	2	63	24.4	0	1	167	100	1	0	0	1	0	0	1	0	0	0	78.7217	84.1508	1	1	0	1	0	1	1	1	1	0	0	95	1	0	2	0	1	0	1	4.99	125	153	3.06	1.58	96.8354	0.78	2.91	1.21	1.31
0952	0	2	66	20.1	1	0	125	80	1	1	0	1	0	0	0	0	0	1	43.9399	65.4424	1	1	0	1	0	1	0	1	0	0	0	75	1	0	2	0	1	0	1	7.3	124	232	5.06	1.55	149.677	4.78	3.26	1.03	1
0953	0	1	72	22.7	1	0	150	100	1	1	0	1	0	0	0	0	0	0	64.0999	57.8293	1	1	0	0	1	1	0	1	0	1	1	90	0	0	4	1	1	1	1	7.03	109	260	5.08	1.48	175.676	0.81	2.01	0.64	0.93
0954	0	1	60	24.2	1	0	120	80	0	0	0	0	0	0	0	1	0	0	64.5477	64.5477	1	1	0	1	0	1	0	1	0	1	0	90	0	0	1	0	0	0	0	6.1	129	314	3.69	1.71	183.626	1.04	5.83	3.33	1.74
0955	0	1	55	23.8	1	0	108	67	0	0	0	0	0	0	0	1	0	0	92.3662	82.1033	1	0	1	1	0	1	0	1	0	0	1	95	0	0	3	0	1	0	1	9.92	159	207	7.94	1.05	197.143	0.93	3.32	1.88	1.06
0956	0	1	59	22.6	1	0	132	81	0	0	0	1	1	0	0	1	0	1	58.2786	77.7048	1	0	1	1	0	0	0	1	0	1	1	75	1	0	3	0	1	0	1	7.53	129	235	4.49	2.29	102.62	0.65	2.84	1.36	0.93
0957	0	1	50	NA	1	0	104	65	0	1	0	0	0	0	0	1	0	0	NA	NA	1	1	0	1	0	1	0	1	1	1	1	70	1	0	2	0	1	0	1	9.28	124	314	7.42	1.2	261.667	1.12	2.76	1.46	0.86
0959	0	1	68	24.1	1	0	124	67	0	0	0	0	1	0	0	0	1	1	58.413	65.7146	1	1	0	1	0	1	0	1	0	1	1	75	1	0	3	1	1	0	1	6.14	142	126	4.61	0.9	140	1.52	3.7	2.1	1.12
0960	0	1	73	21.8	1	0	125	66	1	0	0	1	0	0	0	0	1	1	33.7264	37.5089	1	1	0	1	0	1	0	1	1	1	1	70	0	0	3	1	1	0	1	5.11	123	110	3.66	0.73	150.685	1.02	3.29	1.42	1.22
0961	0	1	47	17.6	0	1	90	65	0	0	0	0	0	0	0	0	1	0	69.8589	90.5983	1	0	1	1	0	1	0	1	0	1	1	90	0	0	1	1	0	0	1	8.32	132	153	5.72	1.63	93.865	0.67	2.31	1.24	0.63
0962	0	1	70	22.9	1	0	147	80	0	0	0	1	0	0	0	0	0	1	35.9054	36.6748	1	0	1	1	0	1	0	1	0	0	1	75	0	0	3	1	1	0	1	4.86	116	294	3.01	1.33	221.053	2.25	4.85	2.68	1.45
0963	0	2	66	18.5	1	0	124	76	1	1	0	1	0	0	0	1	0	1	39.4086	42.6039	1	0	1	1	0	1	0	1	1	1	1	75	1	0	3	1	1	0	1	7.01	89	257	5.38	1.03	249.515	0.8	3.28	1.87	0.73
0964	0	2	52	23.1	0	1	130	80	0	1	0	0	0	0	0	0	0	0	83.8223	97.3421	1	1	0	1	0	1	0	1	0	0	1	95	1	0	2	1	1	0	1	4.5	112	172	2.6	1.51	113.907	1.85	5.52	3.05	1.28
0965	0	1	60	26.5	1	0	124	80	0	0	0	1	0	0	0	0	0	1	55.003	54.1882	1	1	0	1	0	1	0	1	1	1	1	75	1	0	3	1	1	0	1	8.06	156	163	5.11	2.06	79.1262	0.93	2.92	NA	0.91
0966	0	1	54	25.6	1	0	107	71	0	1	0	1	1	0	0	0	0	0	66.617	75.5451	1	1	0	1	0	1	0	1	0	0	0	90	0	0	3	0	1	0	1	6.75	137	203	5.09	0.99	205.051	4.05	4.8	2.15	1.12
0967	0	1	71	24.4	1	0	124	77	0	0	0	1	0	0	0	0	1	1	57.2389	60.9719	1	1	0	1	0	1	0	1	0	1	1	70	0	0	2	1	1	0	1	10.76	121	225	9.21	0.88	255.682	3.8	3.98	1.84	1.03
0968	0	2	64	20.9	1	0	130	70	0	0	0	1	0	0	0	0	0	1	40.4851	40.025	1	0	1	1	0	1	0	1	0	1	1	75	0	0	2	1	1	0	1	7.09	103	238	5.06	1.36	175	0.89	4.36	NA	1.36
0969	0	1	53	22.9	1	0	126	70	0	1	0	1	0	0	0	1	0	0	76.9822	91.0775	1	1	0	1	0	1	0	1	0	1	1	95	0	0	2	1	1	0	0	7.43	128	263	4.3	2.45	107.347	0.95	3.18	1.92	0.96
0970	0	2	80	25.3	1	0	137	81	0	1	0	1	0	0	0	0	0	0	64.4971	55.0122	1	1	0	1	0	1	0	1	1	0	1	100	0	0	2	1	1	0	1	10.77	121	180	10.11	0.46	391.304	1.13	4.94	2.94	1.34
0972	0	1	67	16.4	1	0	170	100	1	0	0	1	0	0	0	1	0	1	54.0861	60.5031	1	1	0	1	0	1	0	1	0	0	1	75	1	0	2	0	1	0	1	8.03	126	211	6.44	1.02	206.863	0.52	3.91	2.09	1.46
0973	0	1	75	NA	1	0	96	62	0	0	0	1	0	0	0	1	0	0	NA	NA	1	0	1	0	0	0	0	1	1	1	1	90	0	0	3	1	1	1	1	8.91	110	157	7.9	0.7	224.286	0.96	5.54	3.49	1.27
0974	0	1	69	33	1	0	140	80	0	1	0	1	0	0	0	0	1	0	96.2088	89.7228	1	1	0	1	0	1	1	1	1	0	1	100	1	0	1	0	0	0	1	9.85	160	262	8.19	1.26	207.937	12.47	6.56	0.82	1.12
0975	0	1	47	31.8	1	0	140	80	0	1	0	1	1	0	0	0	1	0	183.503	177.282	1	0	1	0	1	1	1	1	0	0	0	100	1	0	2	1	1	0	1	9.64	147	271	5.59	3.12	86.859	4.28	3.49	1.33	0.89
0976	0	1	54	28.2	0	1	110	75	1	0	0	0	0	0	0	1	0	0	73.9663	83.5819	1	1	0	0	0	0	0	1	0	1	0	90	0	0	2	0	1	0	1	4.82	148	145	2.4	1.83	79.235	1.15	3.2	1.77	1.1
0977	0	1	73	26.5	1	0	145	85	1	1	0	1	0	0	0	1	0	1	59.1122	71.2033	1	1	0	1	0	0	0	1	0	1	1	75	1	0	3	1	1	0	1	7.89	126	269	4.05	2.95	91.1864	3.03	NA	NA	0.2
0978	0	1	54	26.5	1	0	132	75	0	0	0	1	0	0	0	1	0	0	71.2812	74.2512	1	1	0	0	0	1	0	1	0	1	0	90	0	0	3	0	1	0	1	10.83	142	298	6.06	4.17	71.4628	3.06	5.19	2.79	1.19
0979	0	1	67	26.7	1	0	130	80	0	0	0	1	0	0	0	0	1	0	68.3611	73.3458	1	1	0	1	0	1	0	1	0	1	1	90	0	0	2	0	1	0	1	3.74	125	130	2.53	0.9	144.444	0.74	2.8	0.89	1.39
0980	0	1	39	28.3	1	0	98	62	0	0	0	0	0	0	0	0	0	0	114.652	116.034	1	1	0	0	0	1	0	1	0	1	1	100	0	0	1	0	0	0	0	8.91	143	207	5.3	2.55	81.1765	1.73	4.88	2.65	1.43
0981	0	1	49	26.2	1	0	133	90	0	0	0	1	0	0	0	1	0	0	88.5191	99.184	1	1	0	1	0	1	1	1	0	1	1	95	0	0	1	1	0	0	1	6.21	152	189	3.63	2	94.5	1.99	4.94	3.15	1.1
0982	0	1	47	20.2	1	0	112	75	1	0	0	0	0	0	0	1	0	0	65.4964	57.3874	1	1	0	0	0	0	0	1	0	1	0	90	0	0	3	1	1	0	1	10.51	123	255	6.03	3.65	69.863	1.98	6.27	4.41	1.15
0983	0	1	62	21.6	1	0	147	65	0	0	0	1	0	0	0	1	0	1	59.7402	77.4756	1	1	0	1	0	0	0	1	0	1	0	75	0	0	1	0	0	0	1	4.65	129	164	3.15	1.19	137.815	1.33	5.38	2.69	1.54
0984	0	1	61	23.9	1	0	167	90	1	1	0	1	0	0	0	1	0	0	72.4328	84.3521	1	1	0	1	0	1	1	1	0	0	1	90	0	0	3	0	1	0	1	4.18	145	137	3.03	0.8	171.25	1.74	2.88	1.49	1.03
0985	0	1	59	23	1	0	122	72	0	1	0	0	0	0	0	1	0	0	76.6242	88.1703	1	1	0	1	0	1	0	1	0	0	0	95	0	0	2	1	1	0	0	8.14	142	221	5.3	1.71	129.24	0.79	3.19	1.79	0.83
0986	0	1	51	23.2	1	0	103	61	0	0	0	0	0	0	0	0	0	0	65.5078	68.356	1	1	0	1	0	1	0	1	0	0	1	100	0	0	3	1	1	0	1	8.02	150	238	6.67	0.94	253.191	1.57	10.28	7.02	1.11
0987	0	1	61	24	1	0	120	70	0	0	0	0	0	0	0	1	0	0	68.9255	76.1386	1	1	0	1	0	1	0	1	0	0	1	90	0	0	3	1	1	0	1	7.61	143	170	5.26	1.87	90.9091	0.79	2.94	1.51	1.17
0988	0	2	77	33.3	0	1	150	62	1	0	0	1	0	0	0	0	0	1	46.3193	51.6825	1	1	0	1	0	1	0	1	0	1	1	75	0	0	3	1	1	0	1	6.43	114	163	4.24	1.66	98.1928	1.57	4.45	2.42	1.49
0989	1	1	67	21.5	1	0	120	80	0	0	0	0	0	0	0	1	0	0	93.7798	71.8572	1	0	1	1	0	1	0	1	0	1	1	95	1	0	3	1	1	0	1	5.87	141	190	3.85	1.58	120.253	1.74	5	3.05	1.28
0990	0	1	67	23.2	0	1	146	86	0	1	0	1	1	0	0	0	0	0	77.6522	77.6522	1	1	0	1	0	1	0	1	0	0	1	95	1	0	3	0	1	0	1	6.75	148	99	4.11	2.12	46.6981	1.63	4.87	2.19	1.76
0991	0	1	78	26.8	1	0	143	73	1	0	0	1	0	0	1	0	0	0	70.6268	91.3994	1	0	1	0	1	0	1	1	1	1	1	90	0	0	3	1	1	0	1	8.88	144	164	6.54	1.56	105.128	1.51	4.03	2.29	0.97
0992	0	1	77	17.1	1	0	157	118	1	0	0	0	0	0	0	0	0	1	32.8698	50.4304	1	1	0	0	0	1	0	1	0	1	1	70	1	0	2	0	1	0	1	7.68	106	251	5.86	1.02	246.078	0.82	3.08	0.84	1.54
0993	0	1	36	24.7	0	1	138	87	0	0	0	1	0	0	0	0	1	0	112.872	139.157	1	0	1	1	0	1	1	1	0	1	1	100	0	0	3	1	1	0	1	6.33	158	198	3.74	2.16	91.6667	2.32	4.52	2.66	1.05
0994	0	2	65	21.9	1	0	112	80	0	0	0	1	0	0	0	0	0	0	65.364	69.8718	1	0	1	1	0	1	0	1	0	1	1	90	1	0	3	1	1	0	1	8.39	117	165	5.82	1.87	88.2353	1.56	5.35	2.96	1.34
0995	0	1	61	23.3	0	1	160	80	0	0	0	1	0	0	0	0	0	0	76.4568	94.4466	1	1	0	1	0	1	1	1	0	1	1	95	0	0	3	0	1	0	1	5.76	144	226	3.35	1.76	128.409	2.2	3.76	2.11	0.95
0996	0	1	54	23.6	1	0	110	70	0	0	0	0	0	0	0	0	0	1	55.3833	72.9757	1	1	0	1	0	1	0	1	0	1	0	75	0	0	2	1	1	0	1	5.74	159	254	3.66	1.57	161.783	6.54	5.3	1.64	0.81
0997	0	1	47	29.6	1	0	157	100	1	0	0	1	0	0	0	1	0	1	45.5971	44.4219	1	1	0	0	1	1	1	1	0	1	1	75	1	0	3	1	1	0	1	7.62	141	214	5.29	1.94	110.309	2.27	5.75	3.03	1.46
0998	0	1	45	24.5	1	0	183	108	0	1	0	1	0	0	0	1	0	0	106.223	107.534	1	0	1	1	0	1	1	1	1	0	1	100	0	0	1	0	0	0	1	11.07	170	154	8.99	1.73	89.0173	4.93	6.58	2.99	1.1
0999	0	1	79	24.2	1	0	125	70	1	0	0	0	0	0	0	1	0	1	57.1113	72.0481	1	1	0	1	0	1	0	1	0	1	1	75	0	0	3	0	1	0	1	6.6	162	176	4.04	2.13	82.6291	1.25	7.85	2.21	1.37
1000	0	1	50	27.2	1	0	130	78	0	1	0	0	0	0	0	0	0	0	107.579	113.908	1	1	0	0	0	1	0	1	0	1	1	100	0	0	3	1	1	0	1	10.84	141	193	7.82	2.19	88.1279	4.5	3.81	1.44	0.89
1001	0	1	81	25.7	1	0	144	82	1	1	0	1	0	0	1	0	0	1	32.1253	37.1378	1	1	0	1	0	1	1	1	0	1	1	70	0	0	3	1	1	0	1	8.71	124	204	6.54	1.15	177.391	4.25	4.95	2.25	0.98
1003	0	2	71	22.3	1	0	110	82	0	1	0	0	0	0	0	0	0	0	77.8449	94.7677	1	1	0	0	0	1	0	1	1	0	1	95	0	0	4	1	1	1	1	5.57	110	185	3.22	1.87	98.9305	0.9	3.63	1.87	1.28
1004	0	1	72	20.4	1	0	132	80	0	0	0	1	0	0	0	0	0	1	55.7576	58.617	1	1	0	0	1	1	0	1	0	0	1	75	1	0	1	0	0	0	1	4.8	135	117	2.82	1.3	90	0.48	3.54	1.95	1.37
1005	0	1	41	27.2	0	1	142	90	0	0	0	1	0	0	0	0	1	0	90.4377	132.739	1	1	0	1	0	1	0	1	0	0	0	95	1	0	1	0	0	0	1	6.96	142	196	4.39	2.13	92.0188	4.14	4.36	1.99	1
1006	0	1	53	24.8	1	0	139	72	0	1	0	1	0	0	0	1	0	0	104.859	114.538	1	0	1	1	0	0	0	1	0	0	1	95	1	0	1	1	0	0	1	6.16	150	178	3.12	2.62	67.9389	2.29	4.56	2.47	1.18
1007	0	1	70	18.4	1	0	155	78	0	1	0	1	1	0	0	0	1	1	49.7527	61.1247	1	0	1	0	1	1	1	1	0	1	1	75	0	0	3	1	1	0	1	10.42	99	304	8.02	1.37	221.898	NA	NA	NA	NA
1008	0	1	61	25.4	1	0	118	74	0	1	0	0	0	0	0	1	0	0	65.3907	63.4092	1	0	1	1	0	1	0	1	1	0	1	90	1	0	1	0	0	0	1	13.99	154	153	12.98	0.71	215.493	1.51	5.37	3.46	1.09
1009	0	2	58	26.6	0	1	125	72	0	1	0	1	1	0	0	0	0	0	87.5185	99.2999	1	1	0	1	0	1	1	1	1	0	1	95	0	0	3	1	1	0	1	6.86	118	161	3.94	2.25	71.5556	1.37	3.04	1.43	1.02
1010	0	1	31	32.4	1	0	146	90	0	1	0	0	0	0	0	1	0	0	172.734	150.446	1	0	1	1	0	1	0	1	1	1	1	100	1	0	3	0	1	0	1	14.31	159	281	9.19	4.04	69.5545	3.03	5.04	2.77	0.93
1011	0	1	52	23.9	1	0	114	73	0	1	0	1	0	0	0	0	0	0	112.785	92.0088	1	0	1	1	0	1	0	1	1	0	1	100	1	0	3	1	1	0	1	11.3	132	257	8.58	1.88	136.702	1.62	4.31	2.4	1.15
1012	0	1	65	24.5	1	0	148	82	0	1	0	1	0	0	0	1	0	0	67.9503	68.7138	1	1	0	1	0	0	0	1	0	0	0	90	0	0	1	0	0	0	1	6.85	132	167	4.86	1.6	104.375	1.1	5.32	3.24	1.33
1013	0	1	48	30.1	1	0	130	80	0	1	0	1	1	0	0	0	1	0	100.699	105.612	1	0	1	1	0	1	0	1	0	1	0	100	0	0	3	1	1	0	1	6.63	138	182	4.41	1.78	102.247	2.49	3.88	1.89	1.12
1014	0	1	75	28	1	0	150	90	0	0	0	1	0	0	0	0	1	1	44.5406	43.7727	1	1	0	1	0	1	1	1	0	1	1	75	0	0	4	1	1	1	1	5.79	130	132	4.1	1.09	121.101	1.05	5.1	2.92	1.19
1015	0	2	55	20.8	1	0	140	84	1	1	0	0	0	0	0	0	0	0	80.2956	86.5933	1	0	1	0	0	1	0	1	0	1	1	95	1	0	1	1	0	0	1	6.08	139	208	3.51	2.03	102.463	3.67	3.94	1.68	1.27
1016	0	1	62	25.8	1	0	148	82	0	0	0	1	0	0	0	1	0	0	84.7596	86.9054	1	0	1	1	0	1	0	1	1	0	1	90	1	0	2	0	1	0	1	11.17	135	200	9.9	0.91	219.78	1.07	4.12	2.54	0.93
1017	0	1	69	25.7	1	0	122	78	0	1	0	1	0	0	0	0	1	0	85.6843	91.5531	1	1	0	1	0	0	0	1	0	0	0	95	0	0	3	1	1	0	1	4.53	140	148	2.74	1.42	104.225	1.2	2.83	1.55	1
1018	0	2	59	20.9	0	1	122	84	1	0	0	1	1	0	0	0	0	0	61.7237	64.9723	1	1	0	0	1	1	0	1	1	1	1	85	0	0	3	1	1	0	1	5.97	124	320	2.99	2.52	126.984	1.55	5.05	3.11	1.06
1019	0	2	52	22.8	0	1	120	84	0	1	0	1	0	0	0	0	0	0	82.1658	89.9911	1	1	0	1	0	1	1	1	0	1	1	95	1	0	3	1	1	0	1	5.69	113	174	3.1	2.2	79.0909	2.05	3.94	2.18	0.99
1020	0	1	75	25	1	0	152	74	1	1	0	1	0	0	0	0	0	0	61.0604	77.3431	1	1	0	1	0	1	1	1	1	0	1	85	0	0	3	1	1	0	1	7.63	141	138	6.03	1.07	128.972	1.38	4.96	3.09	1.23
1021	0	1	61	27	1	0	162	100	0	1	0	1	0	0	0	0	0	1	41.2219	45.0693	1	1	0	1	0	1	0	1	0	1	1	75	0	0	2	0	1	0	0	6.95	124	252	3.97	2.34	107.692	6.87	5.76	1.49	1.11
1022	0	2	74	20.8	1	0	110	69	0	1	0	1	0	0	0	0	0	1	35.3515	40.8226	1	0	1	1	0	1	0	1	1	0	1	75	1	0	3	1	1	0	1	14.36	136	273	13.44	0.56	487.5	1.9	4.61	2	1.59
1024	0	1	59	29.8	1	0	142	90	0	0	0	1	1	0	0	0	1	0	87.7927	85.1589	1	1	0	1	0	1	0	1	1	0	0	95	0	0	2	0	1	0	1	7.6	144	243	4.37	2.3	105.652	1.27	3.54	1.92	0.94
1025	0	2	67	22	1	0	124	78	0	0	0	1	0	0	0	0	0	1	48.4186	62.3472	1	1	0	1	0	0	0	1	0	1	1	75	0	0	2	1	1	0	0	6.03	104	226	4.62	1.23	183.74	4.03	10.79	5.5	1.55
1026	0	1	62	23.4	0	1	110	68	0	1	0	1	1	0	0	1	0	0	88.6394	93.9313	1	1	0	1	0	1	0	1	0	1	1	95	0	0	3	0	1	0	1	6.31	128	227	3.85	1.82	124.725	0.58	2.69	1.1	1.03
1027	0	1	75	19.6	1	0	75	49	0	0	0	0	0	0	0	0	0	1	47.6773	45.4069	1	0	1	0	0	1	0	1	0	1	1	75	0	0	3	1	1	0	1	7.02	118	111	4.6	1.68	66.0714	0.97	5.99	3.76	1.54
1028	0	1	53	25.8	1	0	90	60	1	1	0	1	0	0	0	1	0	0	65.6034	92.3626	1	0	1	1	0	1	1	1	1	0	1	90	1	0	3	0	1	0	1	14.03	146	290	10.7	2	145	2.32	4.59	2.59	1.18
1029	0	1	59	26	1	0	110	70	1	1	0	0	0	0	0	0	1	0	101.934	94.9526	1	0	1	1	0	1	0	1	1	0	1	100	1	0	3	0	1	0	1	13.13	147	196	11.5	1.26	155.556	0.81	5.55	2.64	1.97
1030	0	2	70	20.8	1	0	90	62	0	0	0	1	0	0	0	0	0	1	58.1907	47.8784	1	0	1	1	0	1	0	1	1	0	1	75	1	0	2	1	1	0	1	10.48	114	321	9.54	0.59	544.068	0.62	4.83	2.76	1.46
1031	0	1	77	25.2	1	0	128	81	1	0	0	0	0	0	0	0	0	1	37.4535	38.2393	1	1	0	1	0	0	0	1	0	1	1	75	0	0	2	0	1	0	1	4.98	121	166	4.11	0.6	276.667	1.95	2.4	1.14	0.83
1032	0	1	51	22	1	0	120	90	1	1	0	0	0	0	0	0	0	1	47.3052	45.0215	1	0	1	1	0	1	0	1	0	1	0	75	0	0	1	1	0	0	1	6.34	145	149	4.78	1.05	141.905	3.32	4.4	2.4	0.99
1033	0	1	50	21.1	0	1	110	60	0	0	0	0	0	0	0	1	0	0	96.2714	104.43	1	1	0	1	0	0	0	1	0	0	1	95	0	0	1	0	0	0	1	8.39	154	188	4.47	3.32	56.6265	0.93	6.86	4.6	1.41
1034	0	1	65	29.4	1	0	140	92	0	1	0	1	0	0	0	0	1	0	78.8706	83.3519	1	0	1	0	1	1	0	1	1	1	1	95	1	0	2	0	1	0	1	9.92	117	228	7.8	1.33	171.429	1.56	5.42	3.78	0.94
1035	0	2	73	29.4	1	0	91	50	0	1	1	0	0	0	0	0	0	0	66.3057	66.3057	1	0	1	1	0	1	0	1	1	1	1	90	0	0	3	0	1	0	1	14.8	124	169	12.36	1.41	119.858	0.76	5	2.95	1.23
1036	0	1	73	28.3	1	0	120	80	1	0	0	0	1	0	0	0	1	1	30.4679	43.4955	1	1	0	0	1	1	0	1	0	1	0	70	0	0	3	1	1	0	1	9.97	92	166	7.77	1.39	119.424	1.91	3.23	1.64	1.1
1037	0	1	81	23.1	1	0	152	84	0	1	0	1	0	0	0	0	1	1	34.8092	41.6985	1	1	0	1	0	1	1	1	1	0	1	75	0	0	3	1	1	0	1	8.76	127	131	6.67	1.74	75.2874	4.81	4.16	1.4	0.82
1038	0	1	50	26.2	1	0	120	80	1	1	1	1	0	0	0	1	0	0	126.834	152.2	1	1	0	1	0	1	0	1	0	1	1	100	1	0	3	1	1	0	1	6.25	126	239	3.16	2.48	96.371	0.97	3.33	1.65	0.99
1039	0	2	79	18.7	1	0	105	51	1	0	0	1	0	0	1	0	0	1	38.0318	35.6548	1	0	1	1	0	0	0	1	1	0	1	75	1	0	3	1	1	0	1	14.61	92	338	12.8	1.09	310.092	1.26	4.27	2.22	1.18
1040	0	1	60	28.7	1	0	106	56	0	0	0	0	0	0	0	1	0	0	81.4996	92.0466	1	1	0	1	0	1	0	1	1	0	1	95	0	0	2	0	1	0	1	11.47	165	256	9.19	1.66	154.217	2.44	7.14	4.47	1.37
1041	0	1	67	21.7	1	0	122	66	0	0	0	1	0	0	0	0	0	1	34.31	41.9659	1	1	0	0	1	1	0	1	0	1	1	70	0	0	3	0	1	0	1	6.16	125	205	3.6	1.73	118.497	1.16	3.01	1.43	0.86
1042	0	1	66	24.4	1	0	116	95	1	0	0	0	1	0	0	0	0	0	59.9819	61.3149	1	1	0	1	0	1	0	1	0	1	1	85	0	0	3	1	1	0	1	5.53	136	128	3.66	1.58	81.0127	1.24	3.42	1.72	1.15
1043	0	2	53	25.8	1	0	150	80	1	0	0	0	0	0	0	0	0	0	93.4169	90.4034	1	1	0	1	0	1	0	1	0	1	1	95	1	0	2	1	1	0	1	8.65	147	248	5.88	2.03	122.167	2.03	5.53	3.19	1.05
1044	0	1	51	25	1	0	130	82	0	1	0	0	0	0	0	1	0	0	102.053	120.332	1	1	0	1	0	1	0	1	1	0	1	100	1	0	1	1	0	0	1	5.55	80	184	3.79	1.17	157.265	2.42	2.69	1.24	0.8
1045	0	2	50	17.5	1	0	110	80	1	0	0	1	0	0	0	0	0	0	61.0902	63.1265	1	1	0	1	0	1	0	1	1	0	1	85	1	0	1	0	0	0	1	14.54	128	219	12.33	1.41	155.319	1.05	3.67	2.05	1.06
1046	0	1	63	21.5	1	0	105	64	1	0	0	0	0	0	1	1	0	0	64.8465	67.0826	1	0	1	0	0	1	0	1	1	0	1	90	1	0	3	0	1	0	1	11.11	158	143	8.68	1.6	89.375	0.87	4.76	1.99	1.86
1047	0	1	72	16.8	1	0	120	70	0	1	0	0	0	0	0	1	0	1	49.5878	64.6144	1	1	0	1	0	1	0	1	0	1	1	75	0	0	4	1	1	1	1	10.64	124	296	7.38	2.11	140.284	0.57	3.59	2.04	1.12
1048	0	1	55	26.3	1	0	120	78	0	1	0	0	0	0	0	0	1	0	88.4489	101.777	1	1	0	0	0	0	0	1	0	1	1	95	0	0	3	1	1	0	1	6.98	132	92	4.62	1.7	54.1176	2.03	3.09	1.48	1
1049	0	2	62	21.2	1	0	108	64	0	0	0	1	0	0	0	0	0	1	45.3888	65.3906	1	1	0	1	0	1	0	1	0	1	0	75	0	0	1	1	0	0	0	7.08	125	255	4.67	1.9	134.211	1.19	3.88	2.33	1.19
1050	0	1	50	NA	1	0	168	97	0	1	0	1	0	0	0	0	0	0	NA	NA	1	1	0	1	0	1	1	1	0	0	1	90	0	0	1	0	0	0	1	15.63	150	142	12.3	1.91	74.3455	1.16	4.21	2.74	0.87
1051	0	2	58	21.2	1	0	160	90	0	1	0	1	0	0	0	0	0	0	73.2488	85.2078	1	1	0	1	0	1	1	1	1	1	1	90	1	0	3	1	1	0	1	7.74	150	240	5.4	1.78	134.831	7.94	6.11	1.5	1.25
1052	0	2	53	25.2	1	0	150	85	1	1	0	1	0	0	0	0	0	0	104.16	101.944	1	1	0	1	0	1	0	1	0	1	1	95	1	0	3	1	1	0	1	7.15	138	234	4.02	2.48	94.3548	3.79	4.06	1.8	1.18
1053	0	1	67	28.4	1	0	180	120	1	0	0	1	0	0	1	0	1	1	56.5494	52.8842	1	0	1	1	0	1	1	1	1	1	1	75	1	0	1	0	0	0	1	11.84	145	222	10.07	1.01	219.802	1.2	5.09	2.8	1.42
1054	0	1	53	27.6	1	0	142	90	1	0	0	1	0	0	1	1	0	0	100.529	96.5609	1	0	1	1	0	1	0	1	1	0	1	95	1	0	4	0	1	1	1	18.67	139	319	15.23	2.45	130.204	2.16	5.55	3.5	1.01
1055	0	1	59	25.3	1	0	132	76	1	1	0	1	0	0	0	0	1	0	130.607	105.211	1	1	0	0	0	1	0	1	0	0	0	100	0	0	3	0	1	0	1	9.19	132	224	6.75	1.51	148.344	1.49	2.57	1.22	0.93
1056	0	2	73	24.4	1	0	150	98	0	1	0	1	0	0	1	0	0	1	37.3226	40.2255	1	1	0	1	0	1	1	1	1	1	1	75	0	0	3	1	1	0	1	4.75	95	131	3.26	1.1	119.091	9.06	5.95	1.13	0.84
1057	0	1	50	22.5	1	0	128	70	0	0	0	0	0	0	0	1	0	0	87.2145	111.744	1	1	0	0	0	0	0	1	0	1	1	95	1	0	1	0	0	0	0	7.83	164	171	5.41	1.61	106.211	2.03	3.09	1.56	0.89
1058	0	2	73	24.1	1	0	150	88	1	1	0	0	0	0	0	0	0	1	56.8735	57.686	1	0	1	1	0	1	0	1	1	0	1	75	0	0	3	1	1	0	1	10.14	115	265	7.49	1.93	137.306	1.1	4.77	2.94	1.08
1059	0	1	73	21.3	1	0	121	74	1	0	0	0	0	0	0	0	1	0	68.8494	69.8619	1	0	1	1	0	1	0	1	0	0	1	90	1	0	1	0	0	0	1	6.22	118	235	4.31	1.08	217.593	0.79	4.33	2.37	1.21
1060	0	1	41	24.8	1	0	107	70	1	1	0	0	0	0	0	0	0	0	94.7801	103.51	1	0	1	1	0	1	0	1	1	0	1	95	1	0	1	1	0	0	0	13.66	136	224	11.64	1.41	158.865	3	3.44	1.9	0.8
1061	0	1	65	22.3	1	0	144	78	1	1	0	1	1	0	1	0	1	0	60.1696	69.5938	1	0	1	1	0	1	0	1	0	1	1	85	1	0	3	1	1	0	1	4.42	129	247	2.99	0.93	265.591	1.19	3.17	1.73	1
1062	0	1	76	25.4	0	1	118	63	0	1	0	0	1	0	0	0	0	1	52.6213	71.6411	1	1	0	1	0	1	0	1	0	1	1	75	0	0	2	0	1	0	1	5.84	112	208	4.39	1.02	203.922	1.24	2.54	1.03	1.04
1063	0	1	75	22.8	1	0	106	70	0	1	0	0	0	0	1	0	1	1	51.4167	56.3925	1	1	0	1	0	1	0	1	0	1	1	75	0	0	3	1	1	0	1	5.91	160	175	3.51	1.63	107.362	1.65	3.57	1.82	0.89
1064	0	1	63	24.6	1	0	118	73	0	0	0	0	0	0	0	1	0	0	75.0673	88.5122	1	0	1	0	0	0	0	1	1	1	1	95	1	0	1	0	0	0	1	4.65	150	114	3.74	0.58	196.552	0.66	6.02	3.51	1.35
1065	0	1	66	24.9	1	0	138	69	1	1	0	0	0	0	0	1	0	0	93.0867	93.0867	1	0	1	0	0	0	0	1	1	0	1	95	0	0	3	1	1	0	1	7.32	128	124	5.95	0.92	134.783	1.04	4.44	2.6	1.04
1066	0	1	68	26.3	1	0	158	82	1	1	0	1	1	0	0	0	1	0	75.8241	85.0459	1	1	0	1	0	1	0	1	1	1	1	95	0	0	3	1	1	0	1	7.02	126	179	4.59	1.89	94.709	1.71	3.02	1.2	1.22
1067	0	1	76	26.4	0	1	152	79	1	1	0	1	0	0	1	0	1	0	90.3985	86.8764	1	1	0	0	1	1	1	1	0	1	1	95	0	0	3	1	1	0	1	3.98	116	144	2.86	0.74	194.595	2.08	5.43	3.19	1.24
1068	0	1	62	22.3	1	0	142	74	0	1	0	0	0	0	0	1	0	0	81.1802	82.2923	1	0	1	0	0	1	0	1	0	0	1	95	1	0	4	1	1	1	1	10.5	153	263	8.87	1.23	213.821	0.93	4.35	2.63	0.98
1069	0	1	75	NA	1	0	120	62	0	0	0	0	0	0	0	0	0	0	NA	NA	1	0	1	1	0	0	0	1	1	1	1	90	1	0	1	1	0	0	0	7.78	105	156	5.5	1.72	90.6977	2.57	3.38	1.7	1.24
1070	0	2	71	24.9	1	0	150	90	0	1	0	1	1	0	0	0	0	1	58.7536	72.9355	1	0	1	1	0	1	0	1	1	1	1	75	1	0	3	1	1	0	1	4.53	118	133	2.31	1.77	75.1412	1.89	4.19	2.3	1.37
1071	0	1	39	25.6	1	0	120	58	0	1	0	0	0	0	0	1	0	0	92.2647	147.3	1	1	0	1	0	1	0	1	1	0	1	95	1	0	4	1	1	1	1	14.66	121	262	10.32	3.25	80.6154	3.67	3.56	1.49	0.91
1072	0	2	77	24.8	1	0	150	80	1	0	0	1	0	0	0	0	0	1	44.2328	55.4784	1	0	1	1	0	0	1	1	1	1	1	75	0	0	2	0	1	0	1	3.39	113	184	1.81	1.23	149.593	1.42	3.79	2.02	1.23
1073	0	1	69	26.9	1	0	127	61	0	1	0	0	0	0	0	1	0	0	77.6185	92.5043	1	1	0	0	0	0	0	1	0	0	0	95	0	0	2	0	1	0	1	7.05	174	206	4.4	0.5	412	1.15	4.71	3.04	1.17
1074	0	1	54	25.9	1	0	110	74	0	1	0	0	0	0	0	1	0	1	55.6501	69.1726	1	1	0	0	0	0	0	1	1	1	1	75	1	0	3	1	1	0	1	7.71	132	189	5.31	1.95	96.9231	1.6	4.85	2.89	1.05
1075	0	1	54	26	1	0	140	90	1	0	0	1	0	0	0	1	0	0	102.581	125.977	1	1	0	1	0	1	0	1	0	1	0	95	0	0	3	0	1	0	1	5.37	155	285	3.24	1.61	177.019	2.16	4.13	2.24	1.09
1076	0	1	70	28.9	0	1	158	90	0	1	1	1	0	0	1	0	0	0	86.7468	94.5152	1	1	0	1	0	1	1	1	1	1	1	95	0	0	3	1	1	0	1	7.96	124	162	6.09	1.37	118.248	1.33	3.7	1.72	1.3
1077	0	1	78	24.9	1	0	161	99	0	0	0	0	0	0	1	0	1	1	41.0317	49.611	1	0	1	1	0	1	0	1	0	1	1	75	0	0	3	1	1	0	1	16.07	142	313	13.83	0.72	434.722	1.11	4.68	2.8	1.34
1078	0	1	51	23.8	0	1	124	88	1	0	0	1	0	0	0	1	0	0	68.4218	92.1794	1	1	0	1	0	1	0	1	0	1	1	90	1	0	3	1	1	0	1	5.95	123	239	4.16	1.22	195.902	1.86	3.57	2.09	0.97
1079	0	1	59	21.5	1	0	128	78	1	1	0	1	0	0	0	0	0	0	71.7056	90.4114	1	1	0	1	0	0	1	1	0	1	1	90	1	0	3	1	1	0	1	9.77	146	261	6.5	2.45	106.531	1.38	4.41	2.58	1.21
1080	0	1	65	24.5	1	0	118	70	0	0	0	0	1	0	0	0	1	0	65.4034	71.7842	1	1	0	0	0	1	0	1	0	0	0	90	0	0	3	1	1	0	1	6.07	127	205	3.19	2.12	96.6981	0.87	3.42	1.77	1.01
1081	0	2	73	25	1	0	130	70	1	1	0	1	0	0	0	0	0	0	79.8671	78.3881	1	1	0	1	0	1	1	1	0	1	1	95	1	0	3	1	1	0	1	5.7	128	181	2.86	2.46	73.5772	1.77	3.17	1.33	1.08
1083	0	1	34	29.3	1	0	125	84	0	0	0	0	0	0	0	1	0	0	89.0892	120.217	1	0	1	1	0	1	0	1	1	0	1	95	1	0	3	1	1	0	1	12.42	139	155	10.16	1.6	96.875	4.24	4.68	1.87	1.08
1084	0	2	63	21.1	1	0	115	75	0	1	0	0	0	0	0	0	0	1	41.2434	47.066	1	0	1	1	0	1	0	1	1	0	1	75	1	0	3	1	1	0	1	6.19	120	189	5.09	0.84	225	1.04	3.11	1.58	1.17
1085	0	1	51	29.1	0	1	128	80	1	1	0	1	0	0	0	0	0	0	115.602	132.117	1	1	0	0	1	1	0	1	0	1	0	100	1	0	3	1	1	0	1	6.59	142	198	4.24	1.85	107.027	3.42	5.76	2.81	1.26
1086	0	1	66	23.9	0	1	137	70	1	0	0	1	0	0	1	0	1	1	56.6757	77.1052	1	1	0	1	0	1	1	1	1	1	1	75	1	0	2	1	1	0	1	7.14	140	115	4.43	2.12	54.2453	3.34	3.26	1.42	0.91
1087	0	1	77	22.4	1	0	181	84	0	1	0	1	0	0	0	0	1	0	65.2506	64.3568	1	1	0	0	1	1	1	1	0	0	1	90	0	0	3	1	1	0	1	3.23	130	93	1.8	1	93	0.86	3.13	1.56	0.98
1088	0	1	54	23.2	1	0	134	78	0	0	0	1	0	0	0	0	0	1	56.9888	54.9351	1	0	1	1	0	1	0	1	1	0	1	75	1	0	3	1	1	0	1	8.91	129	175	7.37	1.07	163.551	0.97	3.9	2.22	1.28
1089	0	1	75	22.3	1	0	106	64	1	0	0	1	0	0	1	0	1	1	48.1589	52.3926	1	1	0	1	0	1	0	1	1	1	1	75	0	0	3	1	1	0	1	11.3	154	187	8.31	1.34	139.552	1.24	4.35	2.25	1.41
1090	0	1	51	28.3	1	0	107	68	1	1	0	0	0	0	0	0	0	0	108.802	135.125	1	1	0	0	1	1	0	1	1	0	1	100	1	0	3	1	1	0	1	5.39	126	246	2.79	2.04	120.588	2.54	5.06	3.28	0.63
1091	0	1	75	25.4	1	0	120	70	0	1	0	1	1	0	1	0	1	1	33.7584	38.545	1	1	0	1	0	1	0	1	0	0	1	70	0	0	2	1	1	0	1	8.4	119	282	6.16	1.25	225.6	1.34	3.74	1.66	1.3
1092	0	1	44	27	1	0	140	71	0	0	0	0	0	0	0	1	0	0	81.6457	87.6936	1	1	0	1	0	0	0	1	1	1	1	95	0	0	2	1	1	0	1	10.83	154	196	8.24	2.19	89.4977	2.55	4.27	2.09	1.16
1093	0	1	53	20.8	1	0	122	75	1	0	0	0	0	0	0	1	0	0	82.8756	75.9693	1	0	1	1	0	1	0	1	1	0	1	95	1	0	2	0	1	0	1	5.99	147	166	3.73	1.69	98.2249	0.97	3.68	2.14	1.01
1094	0	1	53	27	1	0	130	90	0	1	0	1	0	0	0	0	0	0	96.6882	105.044	1	1	0	1	0	1	1	1	0	1	1	95	1	0	3	1	1	0	1	6.32	148	256	3.49	2.05	124.878	2.45	4.56	2.64	0.94
1095	0	2	49	25.6	1	0	123	72	0	0	0	1	0	0	0	0	0	0	105.735	123.733	1	1	0	1	0	1	0	1	0	0	1	95	1	0	1	0	0	0	1	8.7	144	266	6.72	1.36	195.588	4.68	4.43	1.58	0.97
1096	0	1	60	25.8	1	0	132	88	1	0	0	0	0	0	0	0	0	0	88.1677	78.6361	1	1	0	1	0	1	0	1	0	1	1	95	0	0	3	1	1	0	1	6.38	77	296	3.06	2.79	106.093	0.77	3.87	2.11	1.22
1097	0	1	70	25.1	1	0	125	79	0	1	0	1	0	0	1	0	1	1	54.4565	56.5115	1	0	1	1	0	1	0	1	0	1	1	75	0	0	2	1	1	0	1	7.47	131	100	6.13	0.85	117.647	1.08	3.76	2.3	0.97
[truncated: 5 more columns]
